# Supplementary material for: Uncovering the Worldwide Diversity and Evolution of the Virome of the Mosquitoes Aedes aegypti and Aedes albopictus
Source: Microorganisms. 2021 Aug 3;9(8):1653. doi: 10.3390/microorganisms9081653 (PMC8398489; doi:10.3390/microorganisms9081653)
Supplement: Supplementary file 1 [file microorganisms-09-01653-s001.zip › Supplementary Files_proof.pdf]

# Supplementary File 1: Annotations and mapping coverage of novel and updated *Aedes* viruses

## Formosus virus

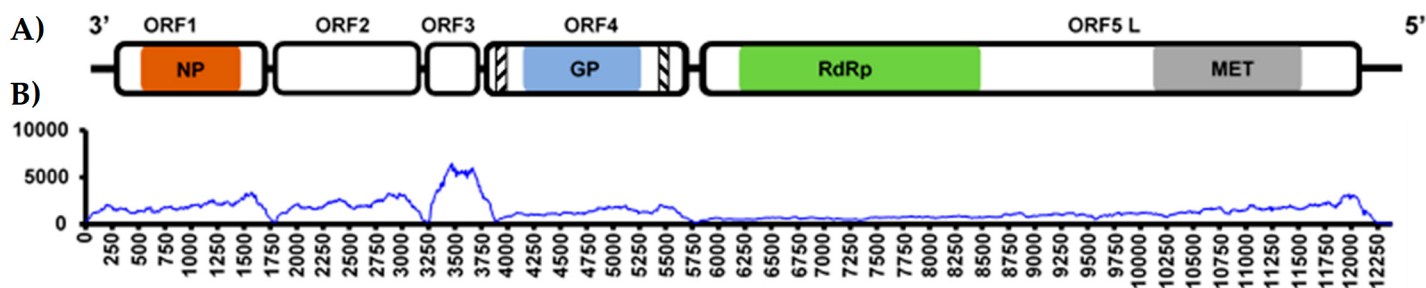

**Figure S1. Genome organization and mapping coverage of Formosus virus.** A) Coloured boxes correspond to predicted protein domains, and boxes with dashed lines represent predicted TM domains. NP, nucleoprotein; GP, glycoprotein; RdRp, RNA-dependent RNA polymerase; MET, methyltransferase. B) Sub-genomic transcription profile shown through mapped RNA-Seq data from *Ae. aegypti* samples originating from Bundibugyo, Uganda (BioProject Accession: PRJNA233429) (1).

**Table S1. Genome features and annotation of Formosus virus**

| Open Reading frame | Genomic location | Size of protein (aa) | Gene name | Closest virus protein by BLASTp; <u>Accession number</u>      | Coverage (%); Identity (%) | E-value  | Predicted protein domain; location                                                                                                                                                                                             | Score; E-value                                                                                            | Notes                                  |
|--------------------|------------------|----------------------|-----------|---------------------------------------------------------------|----------------------------|----------|--------------------------------------------------------------------------------------------------------------------------------------------------------------------------------------------------------------------------------|-----------------------------------------------------------------------------------------------------------|----------------------------------------|
| ORF1               | 35- 1657         | 540                  | NP        | nucleoprotein [New Kent County virus]; <u>AUW34396</u>        | 85%; 26.12%                | 6.00e-38 | <b>pfam00945</b><br>Rhabdovirus nucleocapsid protein; 72..417                                                                                                                                                                  | 190; 4e-54                                                                                                |                                        |
| ORF2               | 1794 - 3110      | 438                  | ORF2      | -                                                             | -                          | -        | -                                                                                                                                                                                                                              | -                                                                                                         |                                        |
| ORF3               | 3177 - 3686      | 169                  | ORF3      | -                                                             | -                          | -        | -                                                                                                                                                                                                                              | -                                                                                                         |                                        |
| ORF4               | 3714 - 5516      | 600                  | GP        | glycoprotein [Merida-like virus Turkey] ; <u>ATW01053</u>     | 62%; 29%                   | 2.00e-42 | <b>pfam00974</b><br>Rhabdovirus spike glycoprotein.                                                                                                                                                                            | 141; 5e-36                                                                                                | <u>TM domains:</u><br>41-63<br>508-530 |
| ORF5               | 5650 - 12051     | 2133                 | L / RdRP  | large polymerase protein [Isfahan virus]; <u>YP_007641386</u> | 99%; 39%                   | 0        | <b>pfam00946</b><br>Mononegavirales RNA dependent RNA polymerase; 52..1066<br><br><b>pfam14314</b><br>Virus-capping methyltransferase; 1363..2023<br><br><b>pfam14318</b><br>Mononegavirales mRNA-capping region V; 1092..1323 | <b>pfam00946</b><br>701; 0.0<br><br><b>pfam14314</b><br>375; 7e-112<br><br><b>pfam14318</b><br>156, 2e-41 |                                        |

## San Gabriel virus

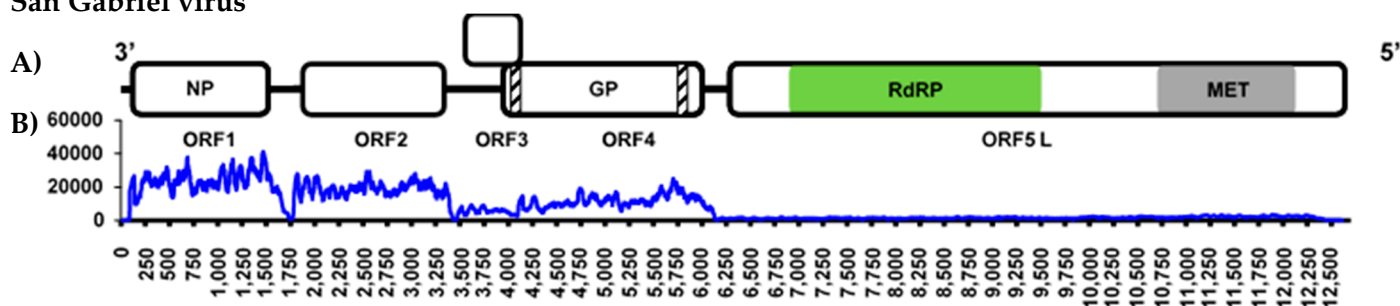

**Figure S2. Genome organization and mapping coverage of San Gabriel virus.** A) Coloured boxes correspond to predicted protein domains, and boxes with dashed lines represent predicted TM domains NP, nucleoprotein; GP, glycoprotein; RdRp, RNA-dependent RNA polymerase; MET, methyltransferase. B) Sub-genomic transcription profile shown through mapped RNA-Seq data from *Ae. albopictus* samples originating from San Gabriel, USA (BioProject Accession: PRJNA563095) (4).

**Table S2. Genome features and annotation of San Gabriel virus.**

| Open Reading frame | Genomic location | Size of protein (aa) | Gene name | Closest virus protein by BLASTp; Accession number                               | Coverage (%); Identity (%) | E-value | Predicted protein domain(s); location                                                                                                                                                                                   | Score; E-value                                                                                                     | Notes                        |
|--------------------|------------------|----------------------|-----------|---------------------------------------------------------------------------------|----------------------------|---------|-------------------------------------------------------------------------------------------------------------------------------------------------------------------------------------------------------------------------|--------------------------------------------------------------------------------------------------------------------|------------------------------|
| ORF1               | 129-1619         | 496                  | NP        | hypothetical protein 1 [Hubei rabdo-like virus 1]; <a href="#">YP_009336980</a> | 78% ; 27.27%               | 2e-37   | <b>PF03216</b><br>Rhabdovirus nucleoprotein; 181..383                                                                                                                                                                   | <b>PF03216;</b><br>1e-13                                                                                           | -                            |
| ORF2               | 1851 - 3311      | 486                  | ORF2      | -                                                                               | -                          | -       | -                                                                                                                                                                                                                       | -                                                                                                                  | -                            |
| ORF3               | 3841 - 3927      | 148                  | ORF3      | -                                                                               | -                          | -       | -                                                                                                                                                                                                                       | -                                                                                                                  | -                            |
| ORF4               | 3878 - 5941      | 687                  | GP        | envelope glycoprotein [Lasius neglectus virus 2]; <a href="#">AYW51542</a>      | 47%, 22.75%                | 6e-14   | -                                                                                                                                                                                                                       | -                                                                                                                  | <u>TM domain:</u><br>556-578 |
| ORF5               | 6194 - 12438     | 2081                 | L / RdRP  | RNA-dependent RNA polymerase [Wuhan Ant Virus]; <a href="#">YP_009304559</a>    | 97%, 39.34%                | 0       | <b>pfam00946</b><br>Mononegavirales RNA dependent RNA polymerase; 194..1041<br><b>pfam14314</b><br>Virus-capping methyltransferase; 1062..1299<br><b>pfam14318</b><br>Mononegavirales mRNA-capping region V; 1660..1840 | <b>pfam00946;</b><br>411; 1.4e-138<br><br><b>pfam14314</b><br>146; 5.6e-39<br><br><b>pfam14318</b><br>131; 9.5e-10 | -                            |

## Longgang mosquito virus

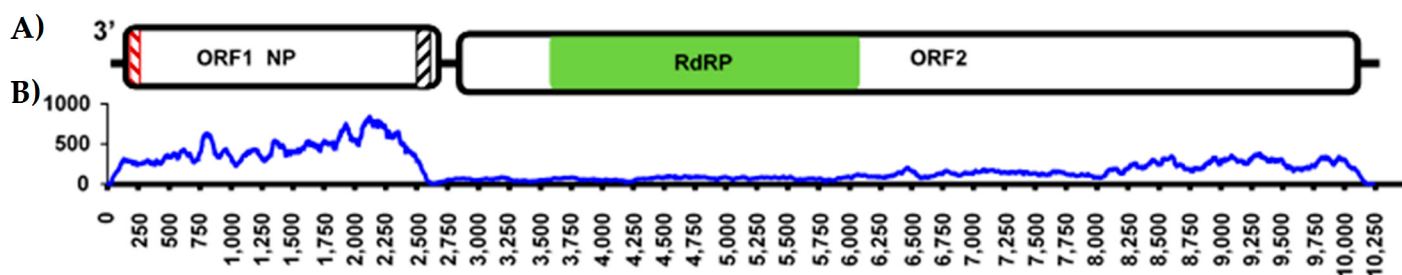

**Figure S3. Genome organization and mapping coverage of Longgang mosquito virus.** A) Coloured boxes correspond to predicted protein domains, black boxes with dashed lines represent predicted TM domains and red boxes with dashed lines indicate predicted signal peptides. NP, nucleoprotein; RdRp, RNA-dependent RNA polymerase. B) Sub-genomic transcription profile shown through mapped RNA-Seq data from *Ae. albopictus* mosquitoes originating from Longgang District, Shenzhen, China (BioProject: PRJNA475859) (5)

**Table S3. Genome features and annotation of Longgang mosquito virus**

| Open Reading frame | Genomic location | Size of protein (aa) | Gene name | Closest virus protein by BLASTp; <a href="#">Accession number</a>          | Coverage (%); Identity (%) | E-value | Predicted protein domain(s); location                                                                                                              | Score; E-value                                                        | Notes                                                                                                                 |
|--------------------|------------------|----------------------|-----------|----------------------------------------------------------------------------|----------------------------|---------|----------------------------------------------------------------------------------------------------------------------------------------------------|-----------------------------------------------------------------------|-----------------------------------------------------------------------------------------------------------------------|
| ORF1               | 71-2605          | 844                  | NP        | putative nucleoprotein [Scaldis River bee virus]; <a href="#">APT68158</a> | 32%, 23.24%                | 8e-07   | <b>pfam05505</b><br>Ebola_NP, Ebola nucleoprotein; 537..718                                                                                        | <b>pfam05505</b><br>37.1; 0.058                                       | <a href="#">Signal peptide cleavage site</a> ; position: 38; (LG-DV) Score: 0.477 <a href="#">TM domain</a> : 824-843 |
| ORF2               | 2640 - 9980      | 2446                 | L / RdRP  | polymerase [Shayang Fly Virus 1]; <a href="#">YP_009300663</a>             | 59%; 35.55%                | 0       | <b>pfam00946</b> : Mononegavirales RNA dependent RNA polymerase; 303..1084<br><b>pfam14318</b> : Mononegavirales mRNA-capping region V; 1106..1275 | <b>pfam00946</b><br>207; 5e-54<br><br><b>pfam14318</b><br>38.5; 0.033 | -                                                                                                                     |

## Rabai virus

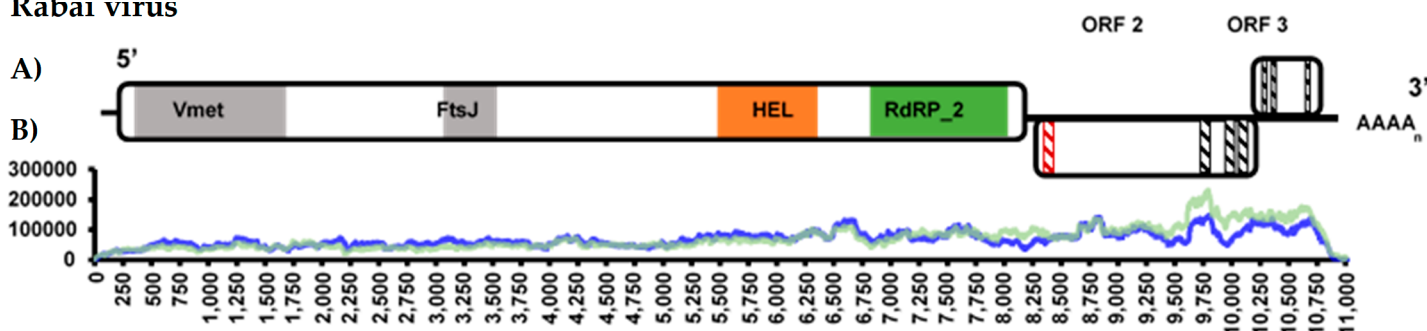

**Figure S4. Genome organization and mapping coverage of Rabai virus.** A) Coloured boxes correspond to predicted protein domains, black boxes with dashed lines represent predicted TM domains and red boxes with dashed lines indicate predicted signal peptides. Vmet, viral methyltransferase; FtsJ, methyltransferase; HEL, helicase; RdRp\_2, RNA-

dependent RNA polymerase. **B)** Mapping coverage of RNA-Seq from *Ae. aegypti* samples from colonies established from Rabai, Kenya (K2; Green, K10, Blue) (BioProject Accession: PRJNA233429) (1).

**Table S4. Genome features and annotation of Rabai virus**

| Open Reading frame | Genomic location | Size of protein (aa) | Gene name | Closest virus protein by BLASTp; <a href="#">Accession number</a>                   | Coverage (%); Identity (%) | E-value | Predicted protein domain(s); location                                                                                                                                                                                                   | Score; E-value                                                                                                                                      | Notes                                                                                                                                                     |
|--------------------|------------------|----------------------|-----------|-------------------------------------------------------------------------------------|----------------------------|---------|-----------------------------------------------------------------------------------------------------------------------------------------------------------------------------------------------------------------------------------------|-----------------------------------------------------------------------------------------------------------------------------------------------------|-----------------------------------------------------------------------------------------------------------------------------------------------------------|
| ORF1               | 94 - 8328        | 2744                 | RdRp      | RNA-dependent RNA polymerase [Yongsan negev-like virus 1]; <a href="#">AXV43886</a> | 98%; 41.26%                | 0.0     | <b>pfam01660</b><br>Viral methyltransferase; 60..320<br><b>pfam01728</b><br>FtsJ-like methyltransferase; 982..1130<br><b>pfam01443</b><br>Viral_helicase1; 1814..2101<br><b>pfam00978</b><br>RNA dependent RNA polymerase 2; 2262..2676 | <b>pfam01660</b><br>88.5; 4e-18<br><br><b>pfam01728</b><br>44.5; 2e-04<br><br><b>pfam01443</b><br>78.2; 4e-15<br><br><b>pfam00978</b><br>214; 4e-59 | -                                                                                                                                                         |
| ORF2               | 8277 - 10199     | 640                  | ORF2      | hypothetical protein [Culex negev-like virus 1]; <a href="#">ASA47387</a>           | 50%; 26.22%                | 4e-30   | -                                                                                                                                                                                                                                       | -                                                                                                                                                   | <a href="#">Signal peptide cleavage site:</a><br>position 16-17 (IDA-QY)<br>Score : 0.923<br><a href="#">TM domains:</a><br>490-512<br>575-597<br>607-629 |
| ORF3               | 10150 - 10818    | 222                  | ORF3      | hypothetical protein [Culex negev-like virus 1]; <a href="#">YP_009388587</a>       | 96%; 52.07%                | 2e-75   | -                                                                                                                                                                                                                                       | -                                                                                                                                                   | <a href="#">TM domains:</a><br>47-66<br>92-111<br>139-161<br>174-196                                                                                      |

### **Aedes binegev-like virus 1 (AeBNV-1)**

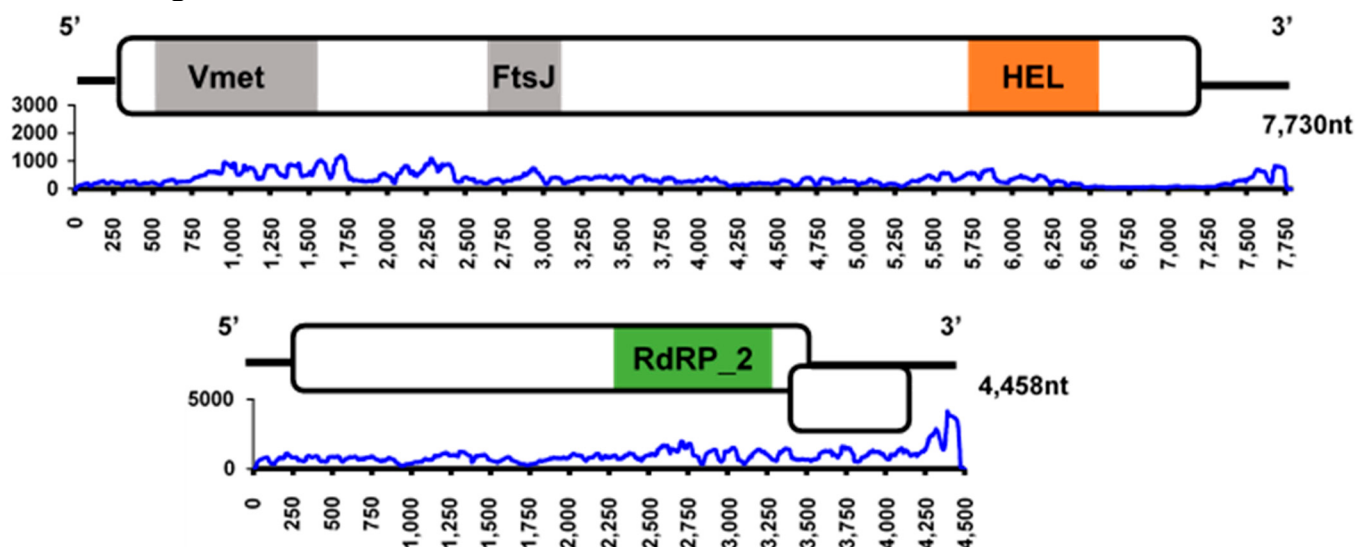

**Figure S5. Genome organization and mapping coverage of Aedes binegev-like virus 1.** Coloured boxes correspond to predicted protein domains. Vmet, viral methyltransferase; FtsJ, methyltransferase; HEL, helicase; RdRp\_2, RNA-dependent RNA polymerase. Sequencing data taken from the Miami, USA *Ae. aegypti* colony originating from pooled soma and ovary libraries (BioProject Accession: PRJNA386859) (5).

**Table S5. Genome features and annotation of Aedes binegev-like virus 1**

| Open Reading frame       | Genomic location | Size of protein (aa) | Gene name | Closest virus protein by BLASTp; <a href="#">Accession number</a>              | Coverage (%); Identity (%) | E-value | Predicted protein domain(s); location                                                                                                                                       | Score; E-value                                                                              | Notes                                                                                                                                                |
|--------------------------|------------------|----------------------|-----------|--------------------------------------------------------------------------------|----------------------------|---------|-----------------------------------------------------------------------------------------------------------------------------------------------------------------------------|---------------------------------------------------------------------------------------------|------------------------------------------------------------------------------------------------------------------------------------------------------|
| <b>Segment 1 7,730nt</b> |                  |                      |           |                                                                                |                            |         |                                                                                                                                                                             |                                                                                             |                                                                                                                                                      |
| ORF1                     | 68-6775          | 2236                 | ORF1      | RdRp [Hubei virga-like virus 2]; <a href="#">YP_009337412</a>                  | 30%; 35.73%                | 1e-50   | <b>pfam01660</b> Viral methyltransferase; 323..509<br><b>pfam01728</b> FtsJ-like methyltransferase; 1031..1178<br><b>pfam01443</b> Viral_helicase1 RNA helicase; 1796..2051 | <b>pfam01660</b> 40.3; 0.010<br><b>pfam01728</b> 50.3; 2e-06<br><b>pfam01443</b> 102; 3e-23 | <a href="#">tblastn top hit</a> : SsRNA virus-like 6 genomic sequence <a href="#">KX148585</a><br>Query length: 69% Identity: 39.85% E-value: 1e-132 |
| <b>Segment 2 4,458nt</b> |                  |                      |           |                                                                                |                            |         |                                                                                                                                                                             |                                                                                             |                                                                                                                                                      |
| ORF1                     | 107-3739         | 1211                 | RdRp      | putative polypeptide [Blackford virus]; <a href="#">AMO03220</a>               | 42.96%; 44%                | 1e-126  | <b>pfam00978</b> RNA dependent RNA polymerase 2; 746..1191                                                                                                                  | <b>pfam00978</b> 277; 4e-82                                                                 | <a href="#">tblastn top hit</a> : SsRNA virus-like 5 genomic sequence <a href="#">KX148584</a><br>Query length: 51.55% Identity: 39% E-value: 4e-155 |
| ORF2                     | 3663 - 4193      | 177                  | ORF2      | hypothetical protein [Hubei virga-like virus 12]; <a href="#">YP_009337823</a> | 100%; 43.26%               | 2e-42   | -                                                                                                                                                                           | -                                                                                           | -                                                                                                                                                    |

## Aedes binegev-like virus 2 (AeBNV-2)

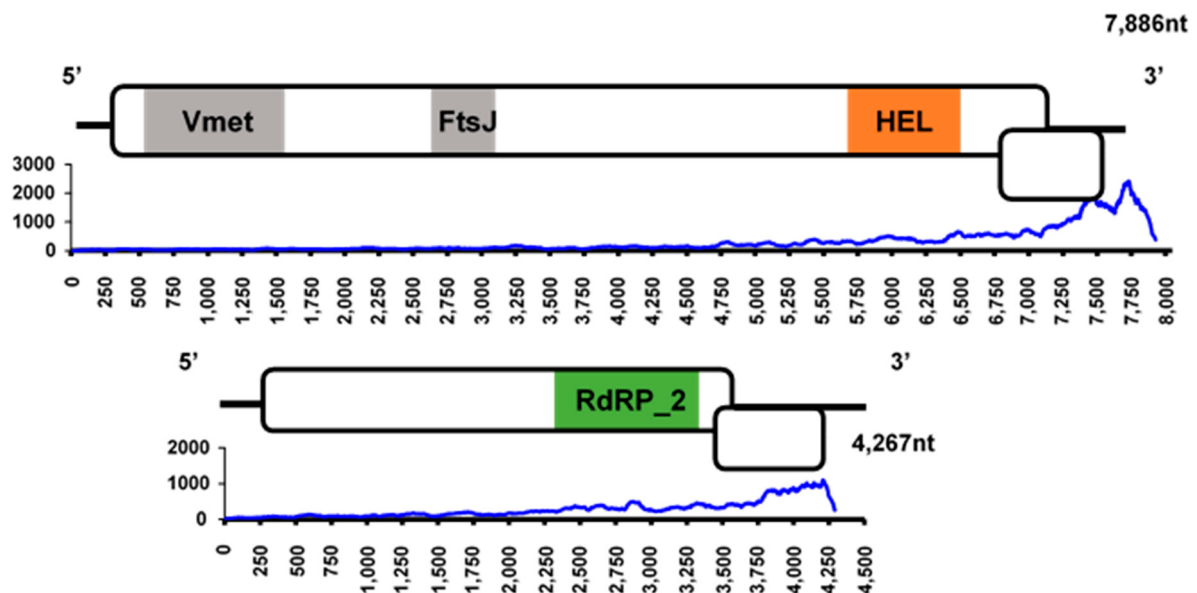

**Figure S6. Genome organization and mapping coverage of Aedes binegev-like virus 2.** Coloured boxes correspond to predicted protein domains. Vmet, viral methyltransferase; FtsJ, methyltransferase; HEL, helicase; RdRp\_2, RNA-dependent RNA polymerase. Mapping coverage of virus segments from RNA-Seq of *Ae. albopictus* samples originating from Longgang district, Shenzhen, China (BioProject: PRJNA475859) (6).

Table S6. Genome features and annotation of *Aedes binegevi*-like virus 2

| Open Reading frame       | Genomic location | Size of protein (aa) | Gene name | Closest virus protein by BLASTp; <a href="#">Accession number</a>              | Coverage (%); Identity (%) | E-value | Predicted protein domain(s); location                                                                                                                          | Score; E-value                                                                               | Notes                                                                                                                                                         |
|--------------------------|------------------|----------------------|-----------|--------------------------------------------------------------------------------|----------------------------|---------|----------------------------------------------------------------------------------------------------------------------------------------------------------------|----------------------------------------------------------------------------------------------|---------------------------------------------------------------------------------------------------------------------------------------------------------------|
| <b>Segment 1 7,866nt</b> |                  |                      |           |                                                                                |                            |         |                                                                                                                                                                |                                                                                              |                                                                                                                                                               |
| ORF1                     | 96-7112          | 2338                 | ORF1      | RdRp [Hubei virga-like virus 2]; <a href="#">YP_009337412</a>                  | 29%; 34.49%                | 1e-51   | <b>pfam01660</b> Viral methyltransferase; 340..643<br><b>pfam01728</b> FtsJ-like methyltransferase; 1048..1196<br><b>pfam01443</b> Viral_helicase1; 1830..2085 | <b>pfam01660</b> 45.4; 3e-04<br><b>pfam01728</b> 48.7; 5e-06<br><b>pfam01443</b> 95.5; 9e-21 | <a href="#">tblastn top hit</a> :<br>SsRNA virus-like 6 genomic sequence <a href="#">KX148585</a><br>Query length: 80% Identity: 40.70%<br>E-value: 2e-137    |
| ORF2                     | 7623-6829        | 264                  | ORF2      | -                                                                              | -                          | -       | -                                                                                                                                                              | -                                                                                            | -                                                                                                                                                             |
| <b>Segment 2 4,267nt</b> |                  |                      |           |                                                                                |                            |         |                                                                                                                                                                |                                                                                              |                                                                                                                                                               |
| ORF1                     | 99-3725          | 1208                 | RdRp      | putative polyprotein [Blackford virus]; <a href="#">AMO03220</a>               | 47%; 42.91%                | 4e-132  | <b>pfam00978</b> RNA dependent RNA polymerase; 742..1188                                                                                                       | <b>pfam00978</b> 268; 6e-79                                                                  | <a href="#">tblastn top hit</a> :<br>SsRNA virus-like 5 genomic sequence <a href="#">KX148584</a><br>Query length: 39%<br>Identity: 52.08%<br>E-value: 1e-154 |
| ORF2                     | 3646 - 4179      | 177                  | ORF2      | hypothetical protein [Hubei virga-like virus 12]; <a href="#">YP_009337823</a> | 94%; 43.79%                | 2e-45   | -                                                                                                                                                              | -                                                                                            | -                                                                                                                                                             |

*Aedes orthomyxo*-like virus 2 (AOLV-2)

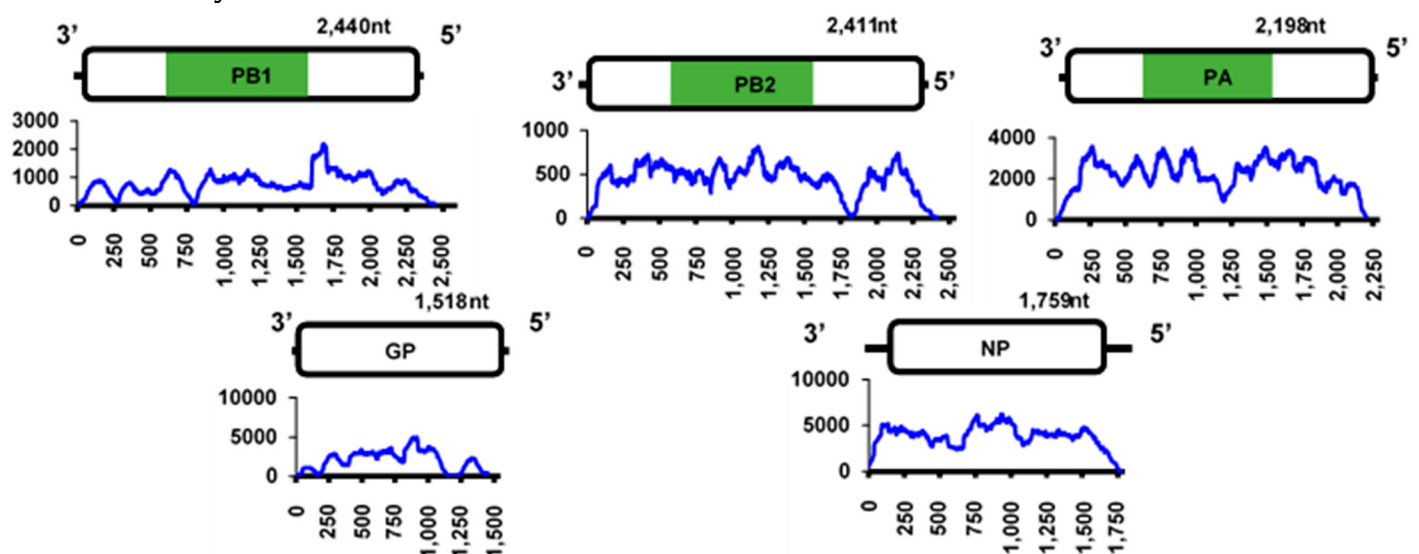

Figure S7. Genome organization and mapping coverage of *Aedes orthomyxo*-like virus 2 Coloured boxes correspond to predicted protein domains. PB1, RNA-dependent RNA polymerase basic subunit 1; PB2, RNA-dependent RNA polymerase basic subunit 2; PA, RNA-dependent RNA polymerase acidic subunit; NP, Nucleoprotein. Mapping

coverage of virus segments from *Ae. albopictus* RNA-Seq samples from Australia: Torres Strait Islands (BioProject accession: PRJNA450281) (7, 8).

**Table S7. Genome features and annotation of Aedes orthomyxo-like virus 2**

| Open Reading frame          | Genomic location | Size of protein (aa) | Gene name   | Closest virus protein by BLASTp; <u>Accession number</u> | Coverage (%); Identity (%) | E-value | Predicted protein domain(s); location                                           | Score; E-value | Notes                                                                                                                                                                                              |
|-----------------------------|------------------|----------------------|-------------|----------------------------------------------------------|----------------------------|---------|---------------------------------------------------------------------------------|----------------|----------------------------------------------------------------------------------------------------------------------------------------------------------------------------------------------------|
| <b>Segment 1 PB1 2450nt</b> |                  |                      |             |                                                          |                            |         |                                                                                 |                |                                                                                                                                                                                                    |
| ORF1                        | 36 - 2396        | 787                  | PB1 protein | PB1 [Whidbey virus]; <u>AQU42764</u>                     | 96%; 76.25%                | 0.00    | <b>pfam00602</b><br>Influenza RNA-dependent RNA polymerase subunit PB1; 33..734 | 185; 3e-49     | -                                                                                                                                                                                                  |
| <b>Segment 2 PB2 2411nt</b> |                  |                      |             |                                                          |                            |         |                                                                                 |                |                                                                                                                                                                                                    |
| ORF1                        | 20 - 2392        | 791                  | PB2 protein | PB2 [Whidbey virus]; <u>AQU42765</u>                     | 94%; 64.26%                | 0.00    | -                                                                               | -              | -                                                                                                                                                                                                  |
| <b>Segment 3 PA 2198nt</b>  |                  |                      |             |                                                          |                            |         |                                                                                 |                |                                                                                                                                                                                                    |
| ORF1                        | 31 - 2160        | 709                  | PA protein  | PA [Whidbey virus]; <u>AQU42766</u>                      | 100%; 65.22%               | 0.00    | <b>pfam00603</b><br>Influenza RNA-dependent RNA polymerase subunit PA; 346..706 | 34.5; 0.22     | <u>Predicted monopartite (NLS):</u><br>Position: 73<br>Motif: PPPLKRSRVE<br>Score:10<br><u>Predicted bipartite NLS:</u><br>Location: 536<br>Motif:<br>DKIPIITVEMLNQDDGV<br>KYSSFIKKAHV<br>Score: 5 |
| <b>Segment 4 NP 1759nt</b>  |                  |                      |             |                                                          |                            |         |                                                                                 |                |                                                                                                                                                                                                    |
| ORF1                        | 191 - 1642       | 484                  | NP protein  | NP [Whidbey virus]; <u>AQU42767</u>                      | 87%; 76%                   | 0.0     | -                                                                               | -              | -                                                                                                                                                                                                  |
| <b>Segment 5 GP 1518nt</b>  |                  |                      |             |                                                          |                            |         |                                                                                 |                |                                                                                                                                                                                                    |
| ORF1                        | 37 - 1401        | 454                  | GP protein  | -                                                        | -                          | -       | -                                                                               | -              | <u>Predicted bipartite NLS:</u><br>Location: 37<br>Motif:<br>EAKKPVALKTLHSVTSM<br>ESKLVETVKATKVI<br>Score: 5.9                                                                                     |

## Aedes orbi-like virus 1 (AOLV)

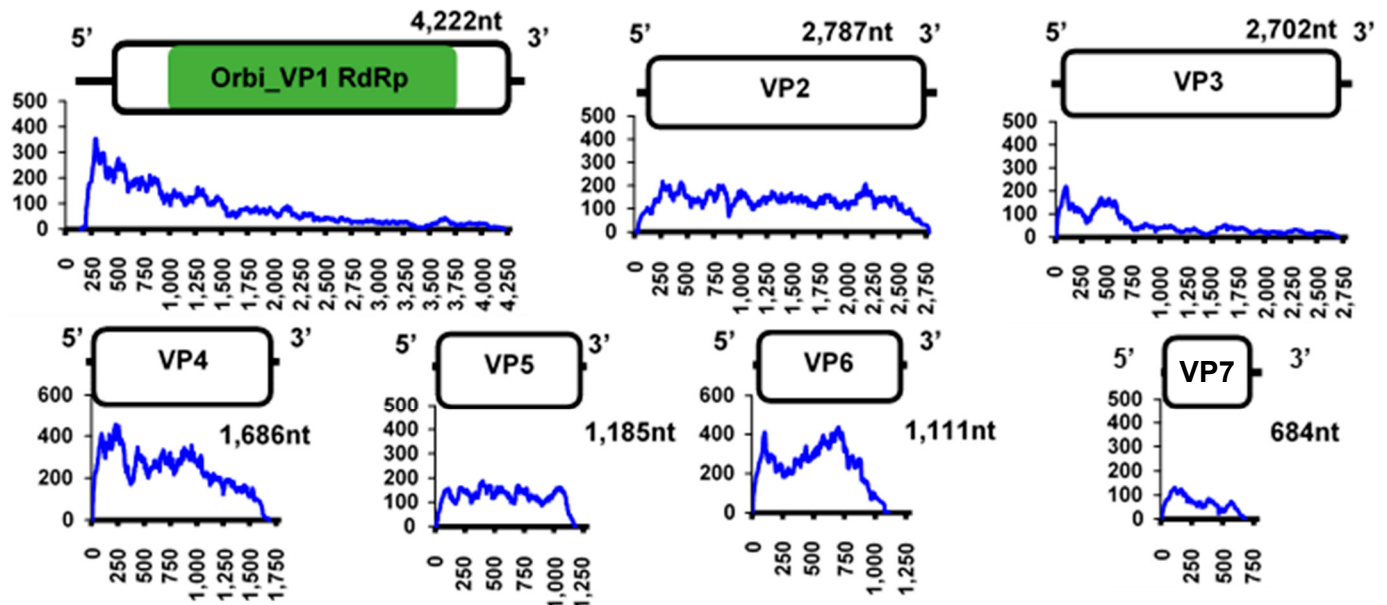

**Figure S8. Genome organization and mapping coverage of Aedes orbi-like virus 1.** Coloured boxes correspond to predicted protein domains. Orbivirus VP1 RdRp RNA-dependent RNA polymerase. Mapping coverage of each segment from RNA-Seq data from *Ae. aegypti* samples originating from Cairns, Australia (Sample B\_8DPI\_18\_GAATTCGT\_L003\_R1\_001) (10).

**Table S8. Genome features and annotation of Aedes orbivirus 1**

| Open Reading frame | Genomic location | Size of protein (aa) | Gene name | Closest virus protein by BLASTp; <u>Accession number</u>                                         | Coverage (%); Identity (%) | E-value | Predicted protein domain(s); location                                   | Score; E-value |
|--------------------|------------------|----------------------|-----------|--------------------------------------------------------------------------------------------------|----------------------------|---------|-------------------------------------------------------------------------|----------------|
| <b>VP1 4,222nt</b> |                  |                      |           |                                                                                                  |                            |         |                                                                         |                |
| ORF1               | 327 - 4169       | 1281                 | VP1       | truncated putative RNA-dependent RNA polymerase-like protein [uncultured virus]; <u>AGW51764</u> | 59%; 82.96%                | 0.0     | <b>pfam05788</b> Orbivirus RNA-dependent RNA polymerase (VP1); 304..922 | 140; 3e-33     |
| <b>VP2 2,781nt</b> |                  |                      |           |                                                                                                  |                            |         |                                                                         |                |
| ORF1               | 37-2703          | 889                  | VP2       | hypothetical protein 1 [Hubei odonate virus 15]; <u>APG79145</u>                                 | 84%; 30.01%                | 6e-72   | -                                                                       | -              |
| <b>VP3 2,702nt</b> |                  |                      |           |                                                                                                  |                            |         |                                                                         |                |
| ORF1               | 43 - 2676        | 878                  | VP3       | hypothetical protein 2 [Hubei odonate virus 15]; <u>APG79146</u>                                 | 99%; 22.68%                | 4e-51   | -                                                                       | -              |
| <b>VP4 1,686nt</b> |                  |                      |           |                                                                                                  |                            |         |                                                                         |                |
| ORF1               | 61 - 1581        | 507                  | VP4       | -                                                                                                | -                          | -       | -                                                                       | -              |
| <b>VP5 1,185nt</b> |                  |                      |           |                                                                                                  |                            |         |                                                                         |                |
| ORF1               | 28 - 1122        | 365                  | VP5       | hypothetical protein 4 [Hubei odonate virus 15]; <u>APG79148</u>                                 | 92%; 30.32%                | 5e-41   | -                                                                       | -              |
| <b>VP6 1,111nt</b> |                  |                      |           |                                                                                                  |                            |         |                                                                         |                |
| ORF1               | 7 - 1005         | 333                  | VP6       | -                                                                                                | -                          | -       | -                                                                       | -              |
| <b>VP7 684nt</b>   |                  |                      |           |                                                                                                  |                            |         |                                                                         |                |
| ORF1               | 16 - 652         | 213                  | VP7       | -                                                                                                | -                          | -       | -                                                                       | -              |

## Aedes partiti-like virus 1 (APLV-1)

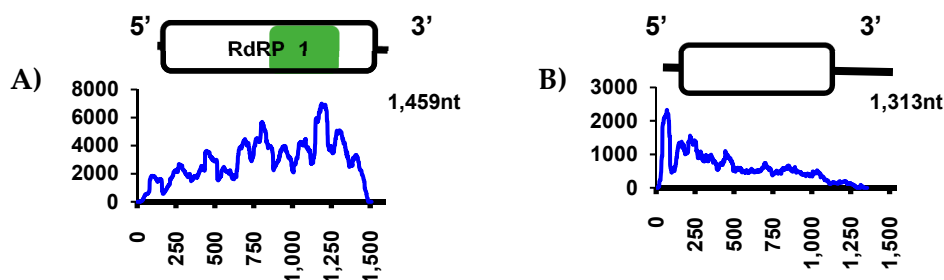

**Figure S9. Genome organization and mapping coverage of Aedes partiti-like virus 1.** Coloured green box corresponds to predicted protein domain RdRP 1, RNA-dependent RNA polymerase Mapping coverage of the genome. RNA-Seq data from whole mosquito Galveston, USA *Ae. aegypti* colony (BioProject Accession: PRJNA399504) (11).

**Table S9. Genome features and annotation of Aedes partiti-like virus 1**

| Open Reading frame      | Genomic location | Size of protein (aa) | Gene name | Closest virus protein by BLASTp; <u>Accession number</u>               | Coverage (%); Identity (%) | E-value | Predicted protein domain(s); location                    | Score; E-value |
|-------------------------|------------------|----------------------|-----------|------------------------------------------------------------------------|----------------------------|---------|----------------------------------------------------------|----------------|
| <b>Segment 1: 1,459</b> |                  |                      |           |                                                                        |                            |         |                                                          |                |
| ORF1                    | 39 - 1453        | 472                  | RdRP      | RdRp [Hubei partiti-like virus 34]; <u>APG78322</u>                    | 99%; 52.77%                | 6e-174  | <b>pfam00680</b> RNA dependent RNA polymerase 1; 84..376 | 98.2; 7e-22    |
| <b>Segment 2: 1,313</b> |                  |                      |           |                                                                        |                            |         |                                                          |                |
| ORF1                    | 59-1126          | 355                  | Capsid    | putative capsid protein [Atrato Partiti-like virus 3]; <u>QHA33900</u> | 99%; 39.66%                | 3e-72   |                                                          |                |

## Tiger mosquito bi-segmented tombus-like virus (TMBTV)

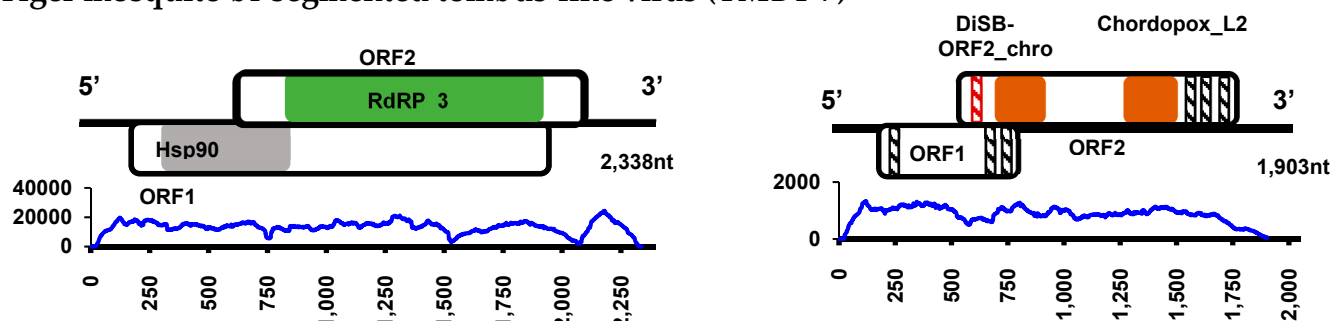

**Figure S10. Genome organization and mapping coverage of Tiger mosquito bi-segmented tombus-like virus.** Coloured boxes correspond to predicted protein domains, and predicted TM domains and signal peptides are depicted as black and red boxes with dashed lines. RdRP\_3, RNA-dependent RNA polymerase 3; Hsp90, viral heat shock homologue. Mapping coverage of sub-genomic gene transcription profile. RNA-Seq data originating from whole *Ae. albopictus* Manassas, USA samples (BioProject accession: PRJNA158021) (3).

Table S10. Genome features and annotation of Tiger mosquito bi-segmented tombus-like virus

| Open Reading frame       | Genomic location | Size of protein (aa) | Gene name | Closest virus protein by BLASTp; <u>Accession number</u>                              | Coverage (%); Identity (%) | E-value | Predicted protein domain(s); location                                                                                              | Score; E-value                                                     | Notes                                                                                                                                   |
|--------------------------|------------------|----------------------|-----------|---------------------------------------------------------------------------------------|----------------------------|---------|------------------------------------------------------------------------------------------------------------------------------------|--------------------------------------------------------------------|-----------------------------------------------------------------------------------------------------------------------------------------|
| <b>Segment 1 2,338nt</b> |                  |                      |           |                                                                                       |                            |         |                                                                                                                                    |                                                                    |                                                                                                                                         |
| ORF1                     | 45-1886          | 614                  | Hsp90     | hypothetical protein 2 [Hypsignathus monstrosus tombus-like virus 1]; <u>AZS32326</u> | 56%; 54.05%                | 3e-98   | <b>PF03225</b><br>Viral heat shock protein Hsp90 homologue 93..144                                                                 | Score: 0.14                                                        |                                                                                                                                         |
| ORF2                     | 884-1999         | 373                  | RdRp      | hypothetical protein 1 [Hypsignathus monstrosus tombus-like virus 1]; <u>AZS32325</u> | 99%; 76.08%                | 0.0     | <b>pfam00998</b> Viral RNA dependent RNA polymerase 3; 6..241                                                                      | 116; 1e-28                                                         |                                                                                                                                         |
| <b>Segment 2 1,903nt</b> |                  |                      |           |                                                                                       |                            |         |                                                                                                                                    |                                                                    |                                                                                                                                         |
| ORF1                     | 83-547           | 155                  |           | hypothetical protein [Culex mosquito virus 1]; <u>AXQ04816</u>                        | 83%; 33.08%                | 3e-14   | -                                                                                                                                  | -                                                                  | <u>TM domains:</u><br>20-39<br>82-104<br>124-146                                                                                        |
| ORF2                     | 525-1649         | 375                  | Coat      | hypothetical protein [Culex mosquito virus 1]; <u>AXQ04817</u>                        | 83%; 26.56%                | 1e-28   | <b>PF16506</b><br>Putative virion glycoprotein of insect viruses; 89..109<br><b>PF05803</b><br>Chordopoxvirus L2 protein; 306..366 | <b>PF16506</b><br>Score: 0.059<br><b>PF05803:</b><br>Score: 0.0091 | <u>Signal peptide cleavage site:</u><br>Position: 23/24 (AAA-QL)<br>Score: 0.927<br><u>TM domains:</u><br>292-314<br>326-348<br>352-374 |

## Updated viruses

### Liverpool tombus-like virus (LTLV), formerly Mosquito nodavirus

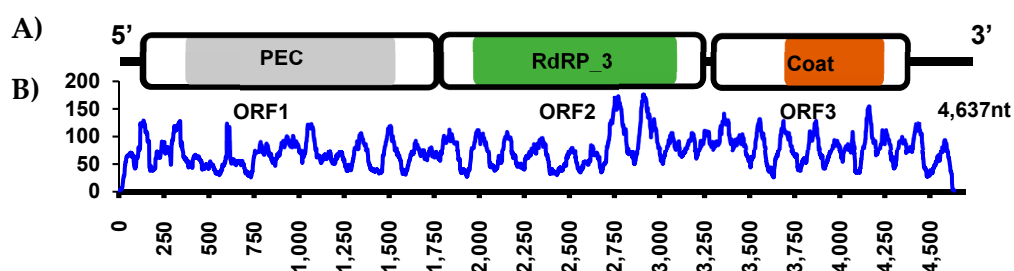

Figure S11. Genome organization and mapping coverage of Liverpool tombus-like virus. A) Coloured boxes correspond to predicted protein domains. PEC, Probable pectinesterase; RdRP\_3, RNA-dependent RNA polymerase 3; Capsid, Nodavirus capsid protein. B) Mapping coverage of Liverpool virus from RNA-Seq data originating from *Ae. aegypti* samples from the Liverpool strain (BioProject: PRJNA232599) (14)

**Table S11. Genome features and annotation of Liverpool tombus-like virus**

| Open Reading frame | Genomic location | Size of protein (aa) | Gene name | Closest virus protein by BLASTp;<br><u>Accession number</u>                  | Coverage (%); Identity (%) | E-value | Predicted protein domain(s); location                                  | Score; E-value |
|--------------------|------------------|----------------------|-----------|------------------------------------------------------------------------------|----------------------------|---------|------------------------------------------------------------------------|----------------|
| OR1                | 51-1241          | 397                  | ORF1      | hypothetical protein 1 [Yongsan tombus-like virus 1];<br><u>YP_009553260</u> | 85%; 69.21%                | 2e-158  | <b>PLN02217</b><br>Probable pectinesterase 93..204                     | 46.2; 2e-05    |
| ORF2               | 1281-2717        | 479                  | ORF2      | hypothetical protein 2 [Yongsan tombus-like virus 1];<br><u>YP_009553261</u> | 99%; 77.82%                | 0.0     | <b>pfam00998</b> : RdRP_3, Viral RNA dependent RNA polymerase. 93..457 | 198; 7e-57     |
| ORF3               | 2736 - 3959      | 408                  | ORF3      | coat protein [Mosquito nodavirus MNV-1];<br><u>ACY74430</u>                  | 90%; 97.02%                | 0.0     | <b>pfam11729</b> : Capsid-VNN, nodavirus capsid protein. 3..230        | 97.2; 2e-22    |

## Supplementary File 1: References

1. McBride CS, Baier F, Omondi AB, Spitzer SA, Lutomiah J, Sang R, Ignell R, Vosshall LB. 2014. Evolution of mosquito preference for humans linked to an odorant receptor. *Nature* 515:222-7.
2. Poelchau MF, Reynolds JA, Denlinger DL, Elisk CG, Armbruster PA. 2013. Transcriptome sequencing as a platform to elucidate molecular components of the diapause response in the Asian tiger mosquito *Aedes albopictus*. *Phys Entomol* 38:173-181.
3. Poelchau MF, Reynolds JA, Elisk CG, Denlinger DL, Armbruster PA. 2013. Deep sequencing reveals complex mechanisms of diapause preparation in the invasive mosquito, *Aedes albopictus*. *Proc Biol Sci* 280:20130143.
4. Gamez S, Antoshechkin I, Mendez-Sanchez SC, Akbari OS. 2020. The Developmental Transcriptome of *Ae. albopictus*, a Major Worldwide Human Disease Vector. *G3* 10: 1051-1062.
5. Lewis SH, Quarles KA, Yang Y, Tanguy M, Frézal L, Smith SA, Sharma PP, Cordaux R, Gilbert C, Giraud I. 2017. Pan-arthropod analysis reveals somatic piRNAs as an ancestral defence against transposable elements. *Nature Ecol Evol* 2: 174-181.
6. Xu JB, Su XH, Bonizzoni M, Zhong DB, Li YJ, Zhou GF, Nguyen H, Tong S, Yan GY, Chen XG. 2018. Comparative transcriptome analysis and RNA interference reveal CYP6A8 and SNPs related to pyrethroid resistance in *Aedes albopictus*. *PLoS Negl Trop Dis* 12:e0006828.
7. Vedururu RK, Neave MJ, Sundaramoorthy V, Green D, Harper JA, Gorrry PR, Duchemin JB, Paradkar PN. 2019. Whole Transcriptome Analysis of *Aedes albopictus* Mosquito Head and Thorax Post-Chikungunya Virus Infection. *Pathogens* 8: 132.
8. Vedururu RK, Neave MJ, Tachedjian M, Klein MJ, Gorrry PR, Duchemin JB, Paradkar PN. 2019. RNASeq Analysis of *Aedes albopictus* Mosquito Midguts after Chikungunya Virus Infection. *Viruses* 11: 513.
9. Lombardo F, Salvemini M, Fiorillo C, Nolan T, Zwiebel LJ, Ribeiro JM, Arca B. 2017. Deciphering the olfactory repertoire of the tiger mosquito *Aedes albopictus*. *BMC Genomics* 18: 770.
10. Koh C, Allen SL, Herbert RI, McGraw EA, Chenoweth SF. 2018. The Transcriptional Response of *Aedes aegypti* with Variable Extrinsic Incubation Periods for Dengue Virus. *Genome Biol Evol* 10:3141-3151.
11. Etebari K, Hegde S, Saldana MA, Widen SG, Wood TG, Asgari S, Hughes GL. 2017. Global Transcriptome Analysis of *Aedes aegypti* Mosquitoes in Response to Zika Virus Infection. *mSphere* 2: e00456-17.
12. Xu Y, Dong Y, Xu Y, Lai Z, Jin B, Hao Y, Gao Y, Sun Y, Chen XG, Gu J. 2019. Differentiation of Long Non-Coding RNA and mRNA Expression Profiles in Male and Female *Aedes albopictus*. *Front Genet* 10:975.
13. Huang X, Poelchau MF, Armbruster PA. 2015. Global Transcriptional Dynamics of Diapause Induction in Non-Blood-Fed and Blood-Fed *Aedes albopictus*. *PLoS Negl Trop Dis* 9: e0003724.
14. Choi YJ, Aliota MT, Mayhew GF, Erickson SM, Christensen BM. 2014. Dual RNA-seq of parasite and host reveals gene expression dynamics during filarial worm-mosquito interactions. *PLoS Negl Trop Dis* 8:e2905.

## Supplementary File 2: Annotations of the RNAi response in *Aedes commensal* viruses

### Renna virus

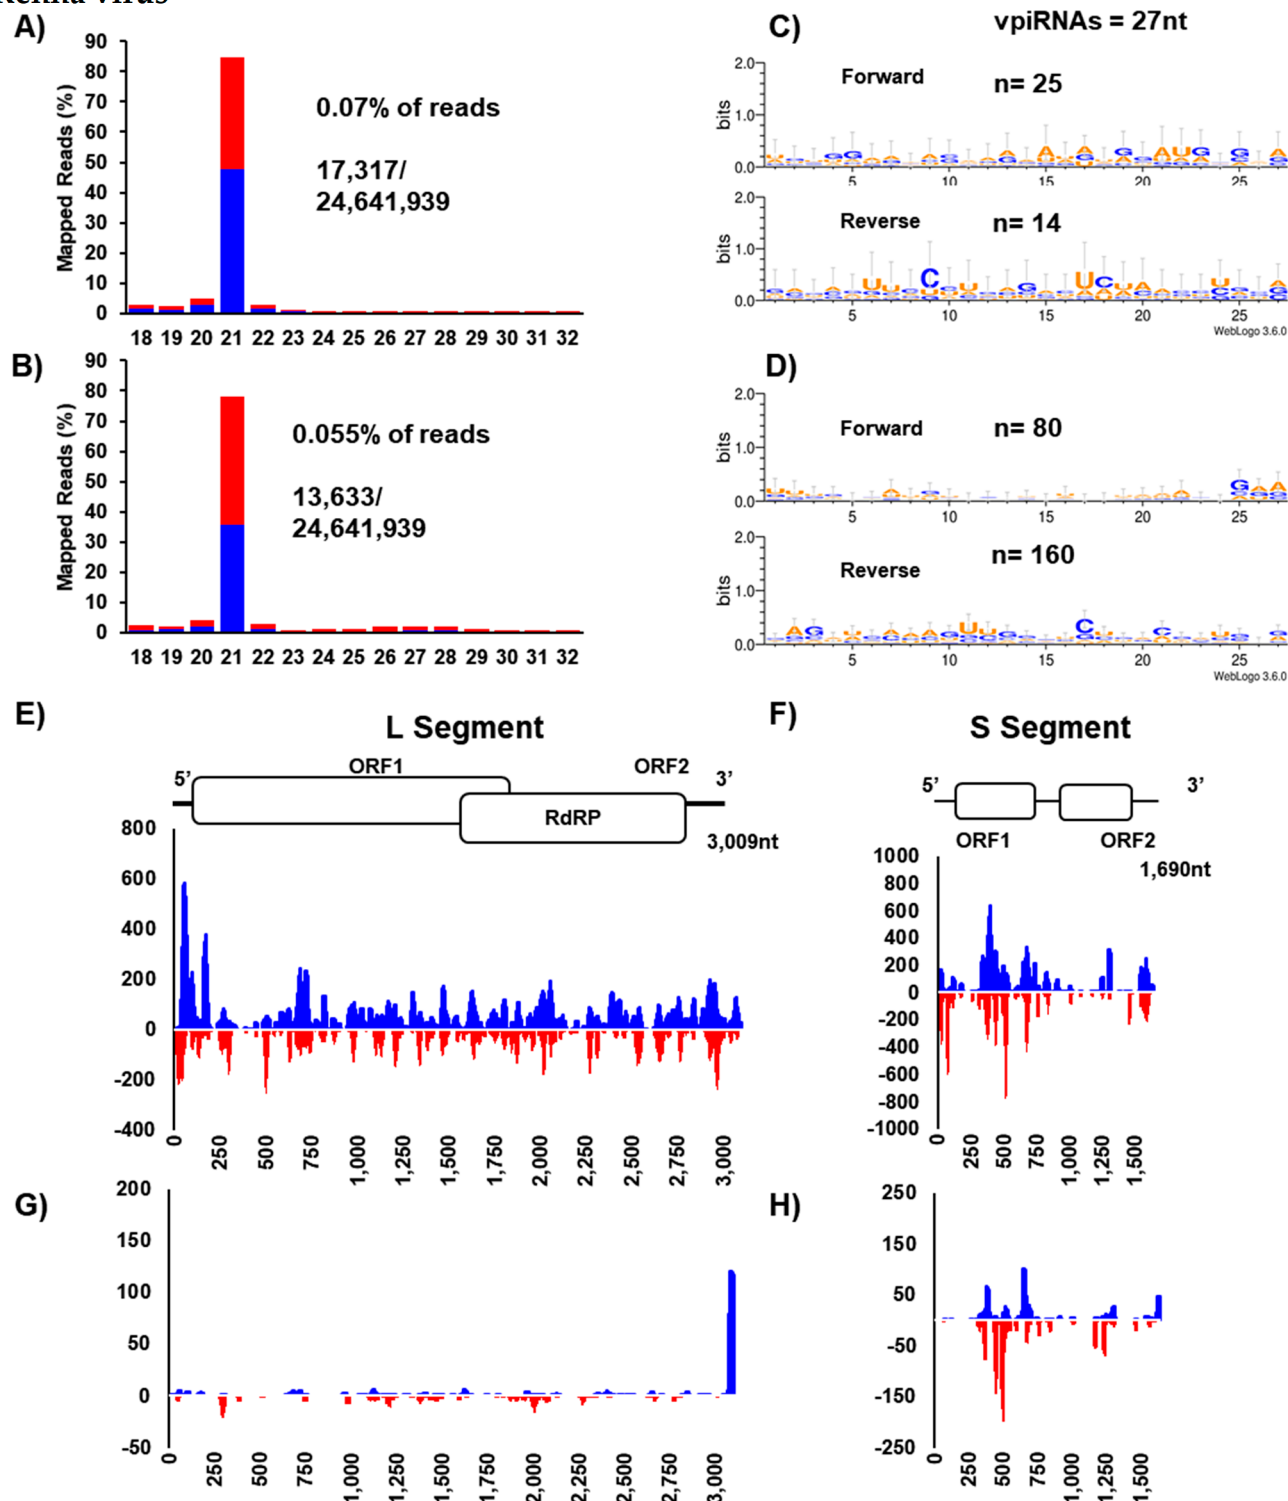

**Figure S12.** Virus-derived small RNA profiles and mapping coverage plots of Renna virus in *Ae. aegypti* *in vivo*. The bar graph represents the small-RNA reads mapping to the **A)** L segment and **B)** S segment of Renna virus Miami laboratory strain with genomic sense indicated in blue and anti-genomic reads mapped indicated in red. Representation of piRNA signature logos within 27-nt reads extracted mapping in the genome and anti-genome direction of both Renna virus L segment **C)** and **D)** S segment indicating that Renna virus does not produce vpiRNA length viral derived RNAs with a classical vpiRNA signature. Mapping profile of viral short interfering RNAs of 21nt in length to the **E)** L segment and **F)** S segment. Mapping profile of vpiRNAs 24-29nt mapping to the **G)** L segment and **H)** S segment. Small RNA sequencing data are taken from the Miami, USA *Ae. aegypti* colony originating from pooled soma and ovary libraries (BioProject Accession: PRJNA386859) (2).

## Wenzhou Sobemo-like virus 4 (WSBV-4)

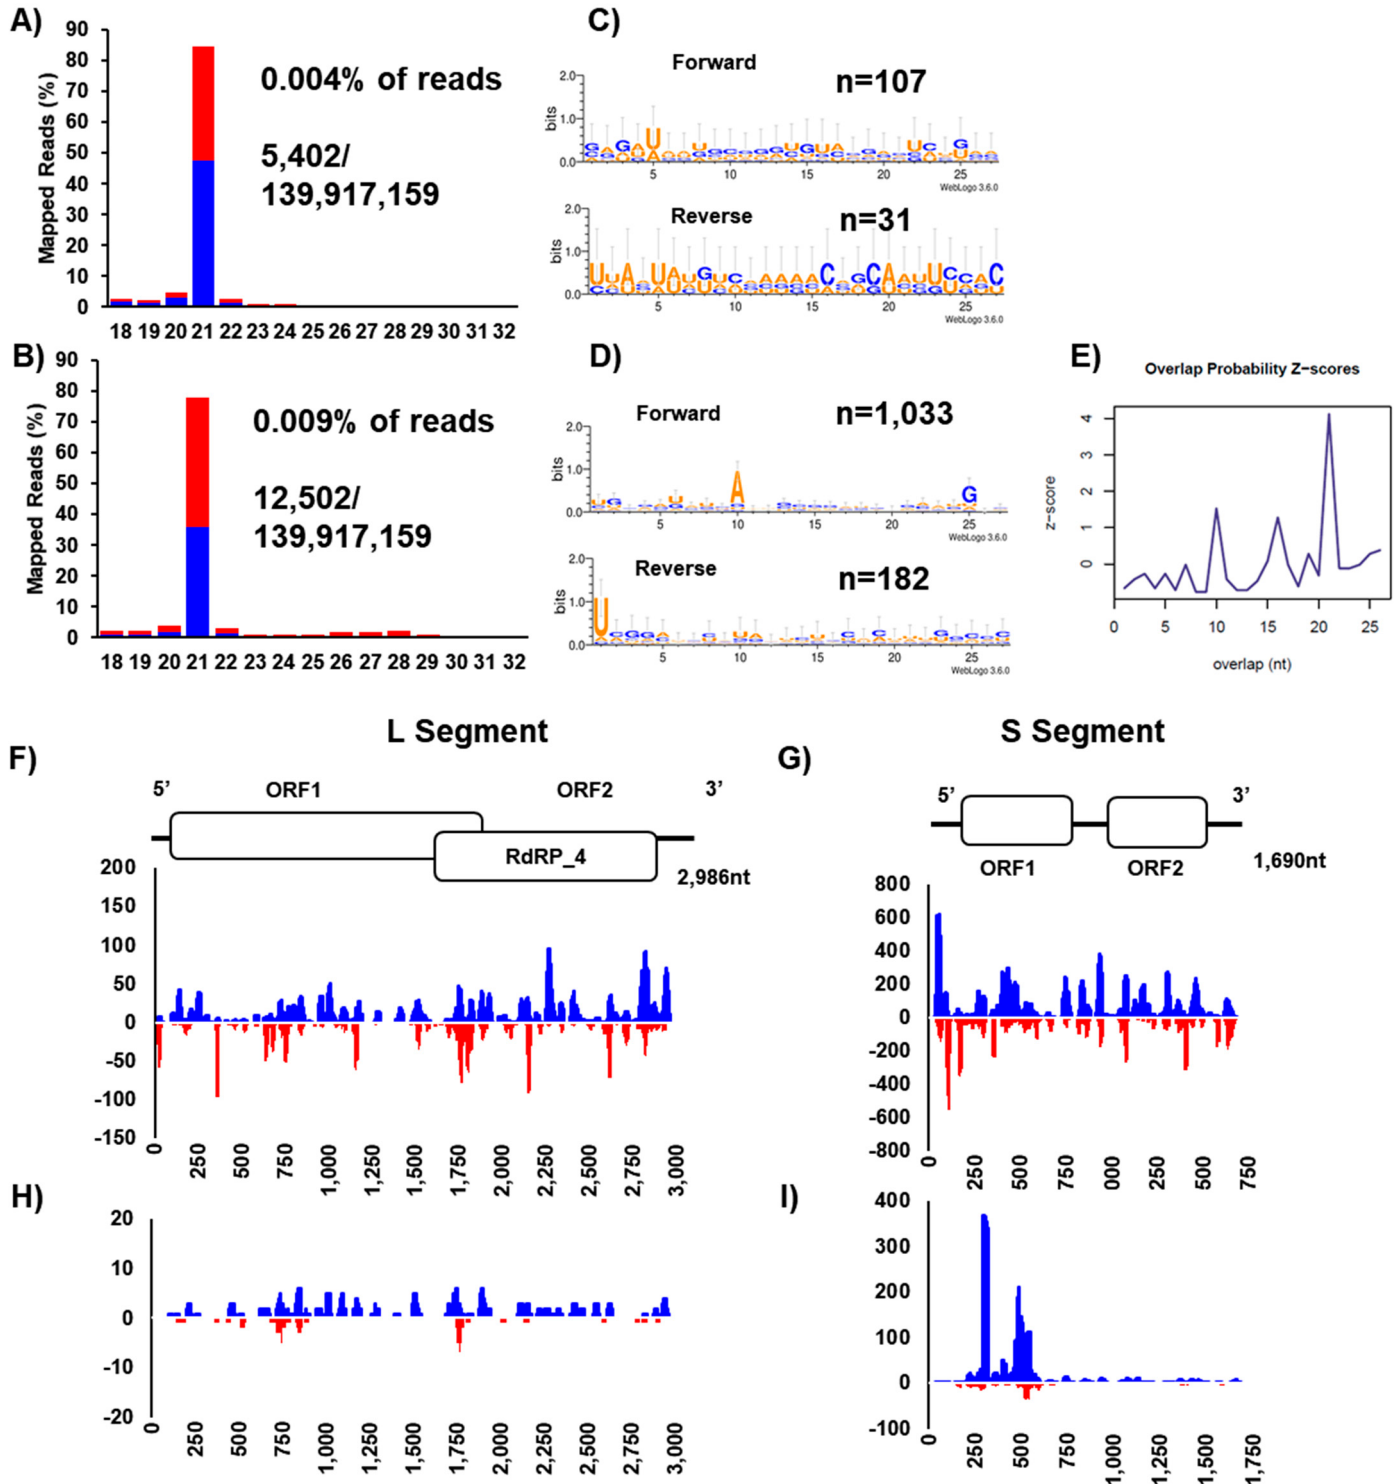

**Figure S13. Virus-derived small RNA profiles and mapping coverage plots of Wenzhou Sobemo-like virus 4 (WSBLV-4) in *Ae. albopictus* in vivo.** The bar graph represents the small-RNA reads mapping to the **A)** L segment and **B)** S segment of WSBLV-4 RML-12 cell line strain with genomic sense indicated in blue and anti-genomic reads mapped indicated in red. Representation of piRNA signature logos within 27-nt reads extracted mapping in the genome and anti-genome direction of both WSBLV-4 L segment **C)** and **D)** S segment indicating that WSBLV-4 produces vpiRNA length virus-derived RNAs with a classical vpiRNA signature for the S segment. **E)** Graphic representation of the position of identified 24-29nt overlapping small RNA pairs and associated z-scores. Mapping profile of vsiRNAs of 21nt in length to the **F)** L segment and **G)** S segment. Mapping profile of vpiRNAs 24-29nt mapping to the **H)** L segment and **I)** S segment. Small RNA sequencing data are taken from whole adult mosquitoes originating from the Phu Hoa, Ben Cat District, Binh Duong Province, Vietnam *Ae. albopictus* colony (BioProject accession: PRJNA293817) (3).

# Wenzhou Sobemo-like virus 4 C-710 cells

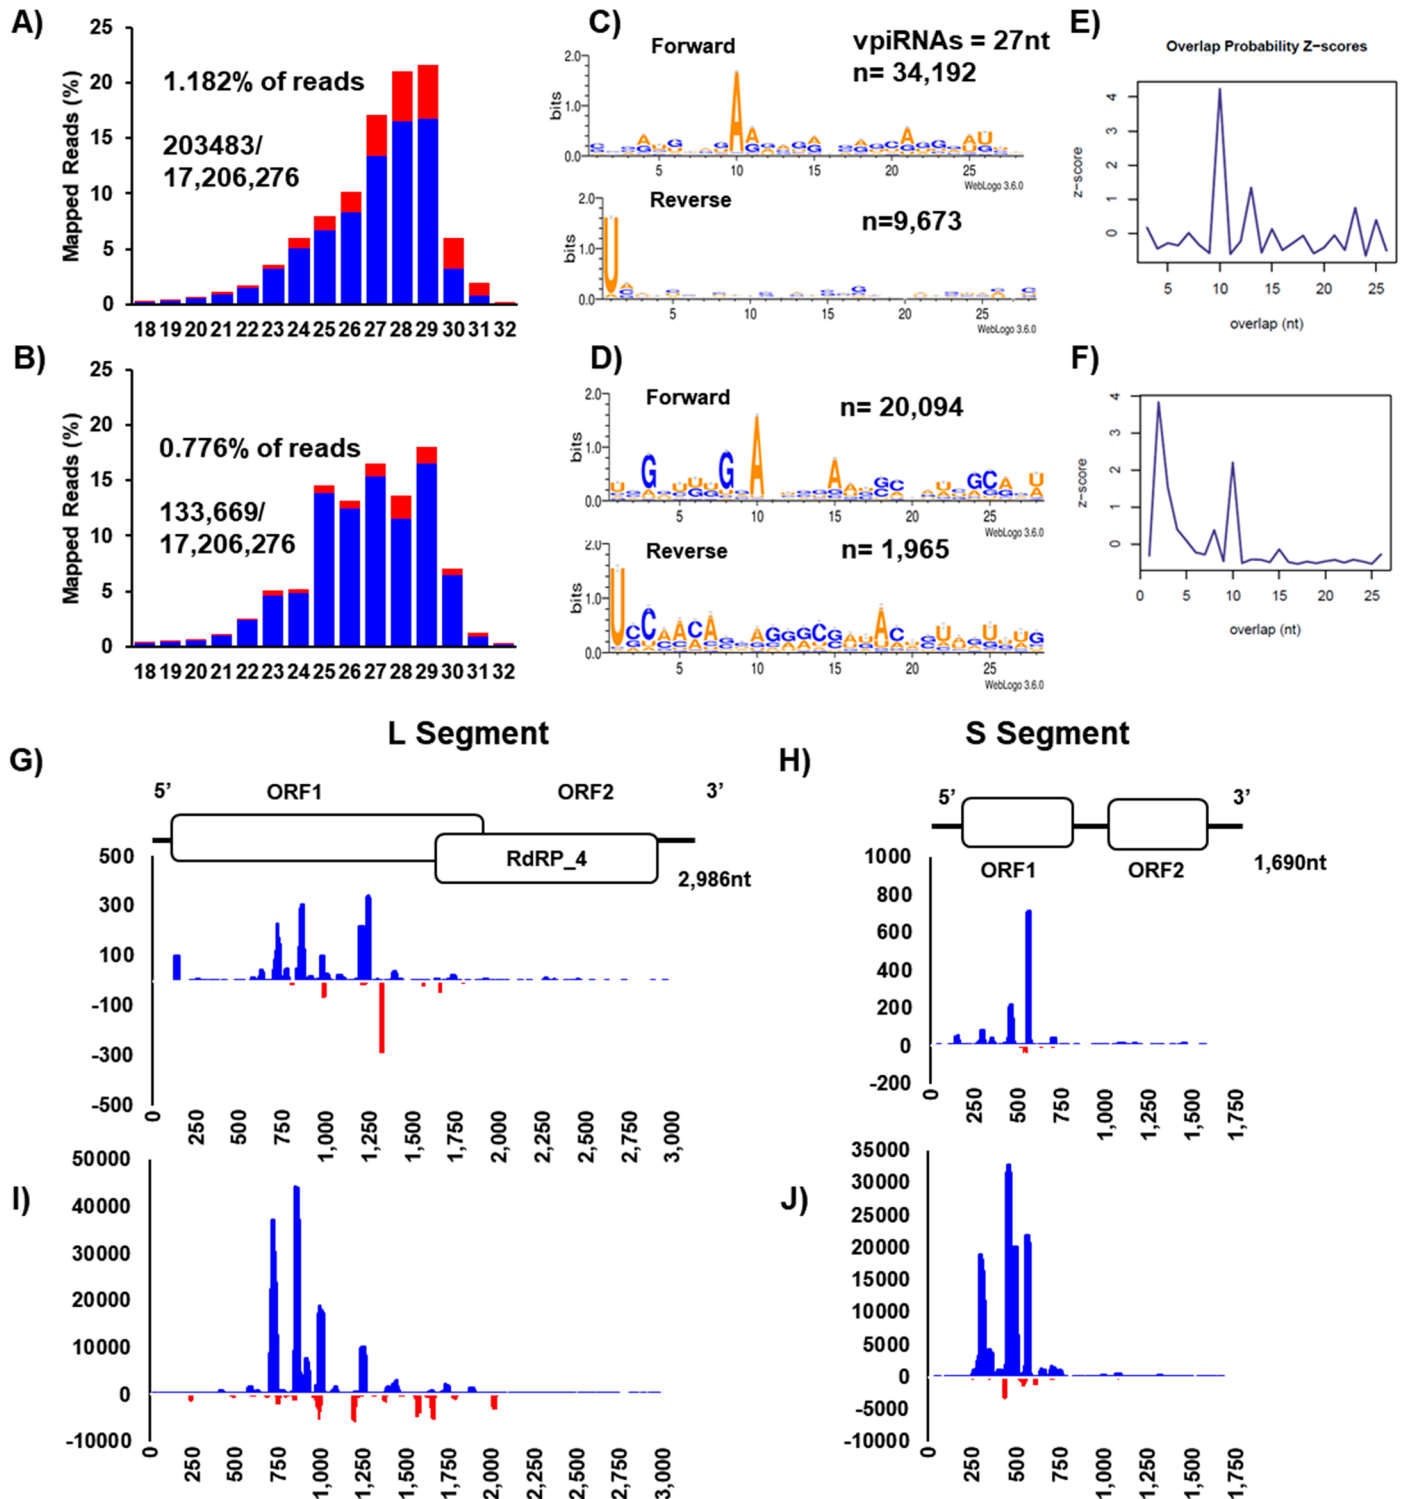

**Figure S14. Virus-derived small RNA profiles and mapping coverage plots of Wenzhou Sobemo-like virus 4 (WSBLV-4) in *Ae. albopictus* C7-10 cells.** The bar graph represents the small-RNA reads mapping to the **A)** L segment and **B)** S segment of WSBLV-4 RML-12 cell-line strain with genomic sense indicated in blue and anti-genomic reads mapped indicated in red. Representation of piRNA signature logos within 27-nt reads extracted mapping in the genome and anti-genome direction of both WSBLV-4 L segment **C)** and **D)** S segment indicating that WSBLV-4 produces vpiRNA length virus-derived RNAs with a classical vpiRNA signature for both segments. Graphic representation of the position of identified 24-29nt overlapping small RNA pairs and associated z-scores of the **E)** L segment and **F)** S segment. Mapping profile of vsiRNAs of 21nt in length to the **G)** L segment and **H)** S segment. Mapping profile of vpiRNAs 24-29nt mapping to the **I)** L segment and **J)** S segment. Small RNA sequencing data are taken from the *Ae. albopictus* C7-10 cell line (BioProject accession: PRJNA147359, SRA run: SRR346391) (1).

## Aedes partiti-like virus 1 (APLV-1)

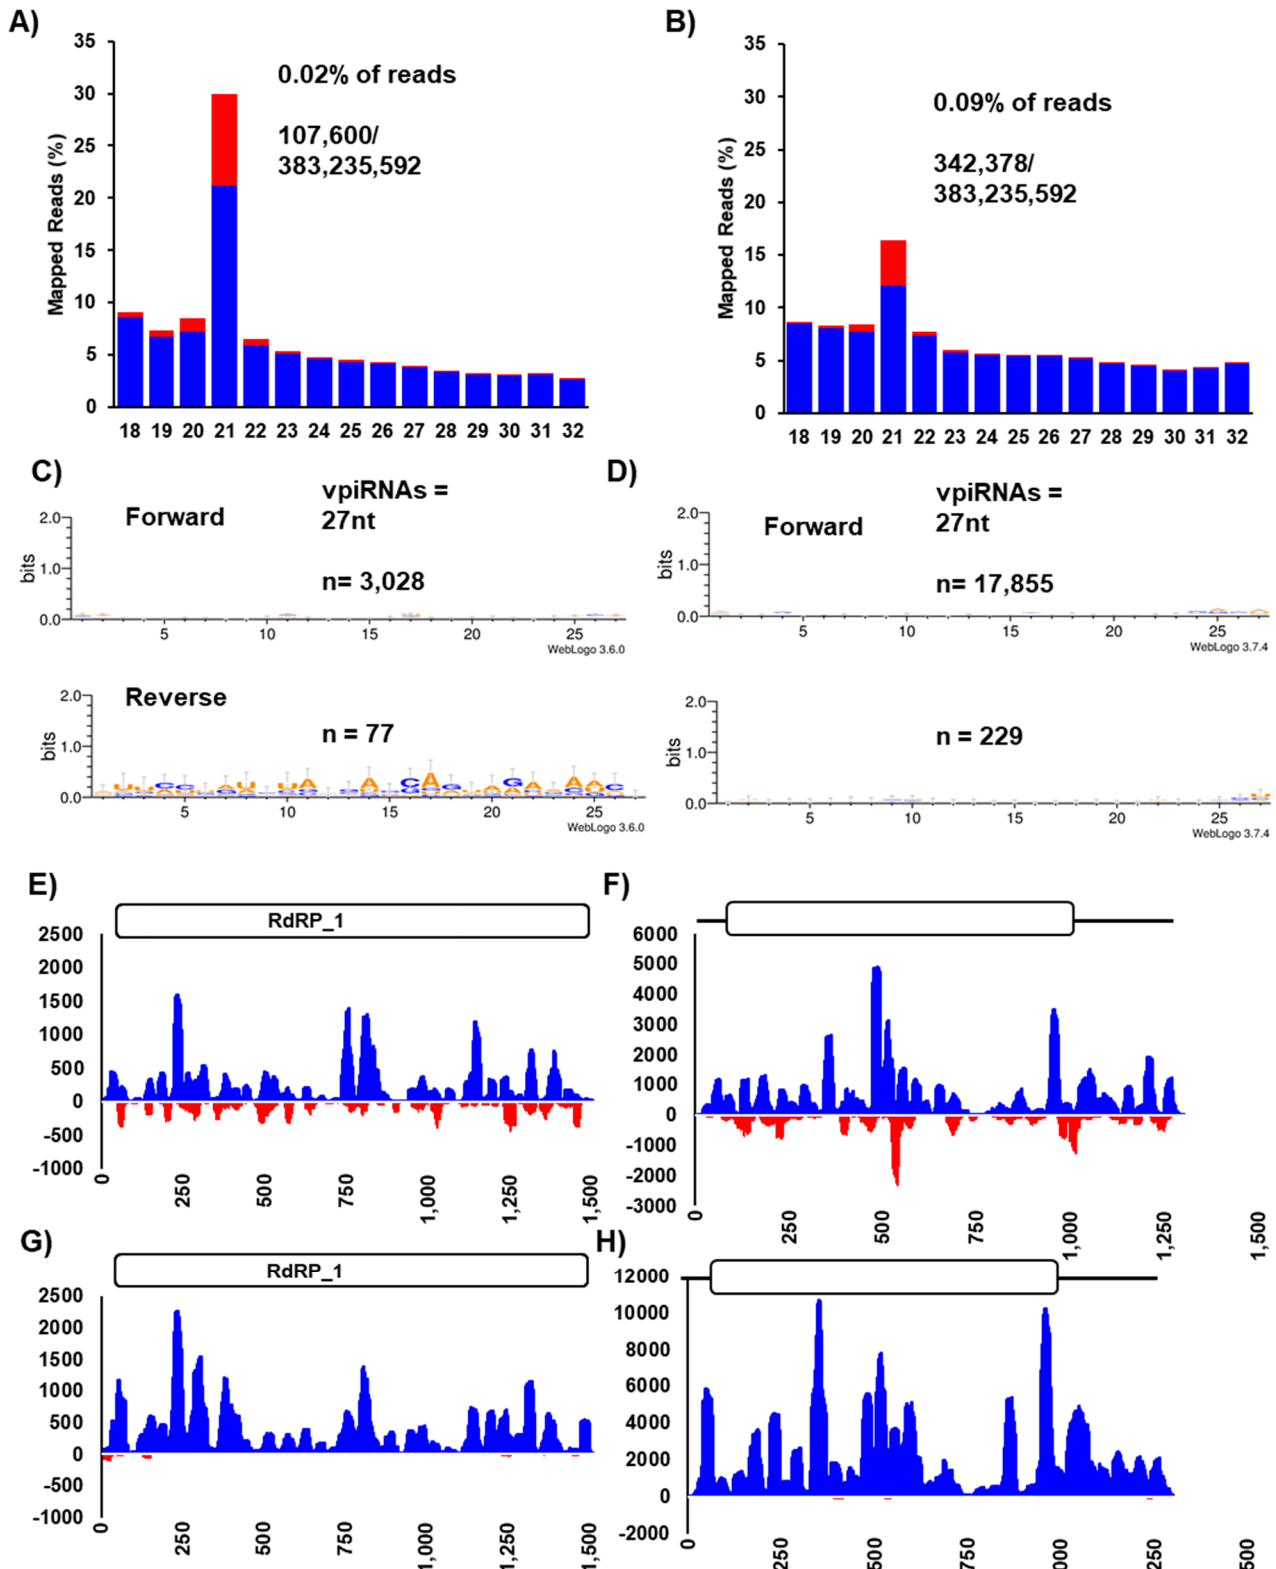

**Figure S15. Virus-derived small RNA profiles and mapping coverage plots of *Aedes partiti*-like virus 1 (APLV-1) in *Ae. aegypti* in vivo.** The bar graph represents the small-RNA reads mapping to the APLV-1 Galveston Strain with genomic sense indicated in blue and anti-genomic reads mapped shown in red against **A)** segment one and **B)** segment two. Representation of piRNA signature logos within 27-nt reads extracted mapping in the genome and anti-genome direction of **C)** segment one and **D)** segment 2. This indicates that APLV-1 does not produce vpiRNA length virus-derived RNAs with a classical vpiRNA signature. Mapping profile of vsiRNAs of 21nt in size against **E)** segment one and **F)** segment two. vpiRNAs 24-29nt mapping against **G)** segment one and **H)** segment two. Small RNA sequencing data are taken from the Galveston, USA *Ae. aegypti* colony from whole mosquitoes (BioProject accession: PRJNA382162) (4)

## Verdadero virus

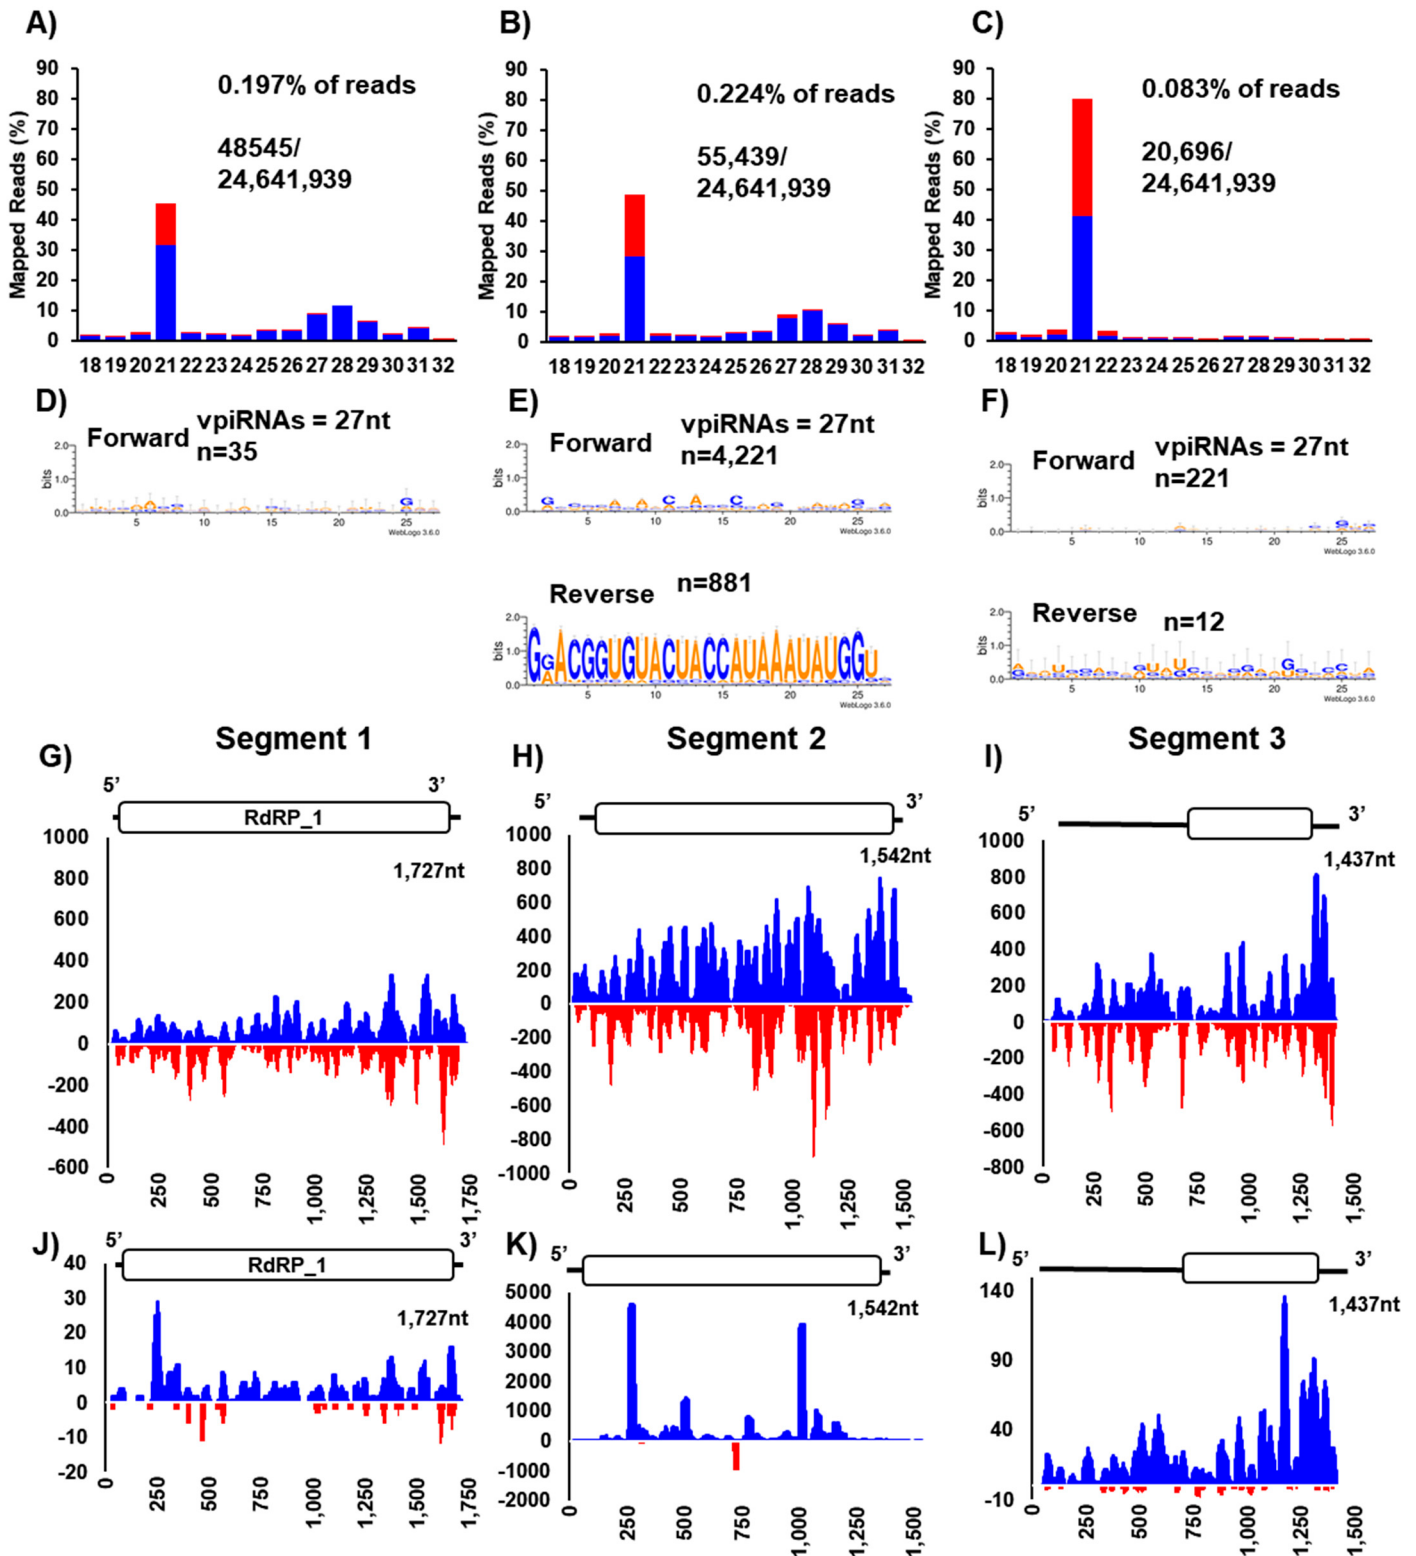

**Figure S16.** Virus-derived small RNA profiles and mapping coverage plots of Verdadero virus in *Ae. aegypti* in vivo. The bar graph represents the small-RNA reads mapping to the Verdadero virus Miami strain A) segment A B) segment B, and C) segment C with genomic sense indicated in blue and anti-genomic reads mapped indicated in red. D-F) Representation of piRNA signature logos within 27-nt reads extracted mapping in the genome and anti-genome direction indicating that Verdadero virus does not produce vpiRNA length virus-derived RNAs with a classical vpiRNA signature. G-I) Mapping profile of vsiRNAs of 21nt in size and J-L) vpiRNAs 24-29nt. Small RNA sequencing data are taken from the Miami, USA *Ae. aegypti* colony originating from pooled soma and ovary libraries (BioProject Accession: PRJNA386859) (2).

## Aedes aegypti toti-like virus 1 (ATLV-1)

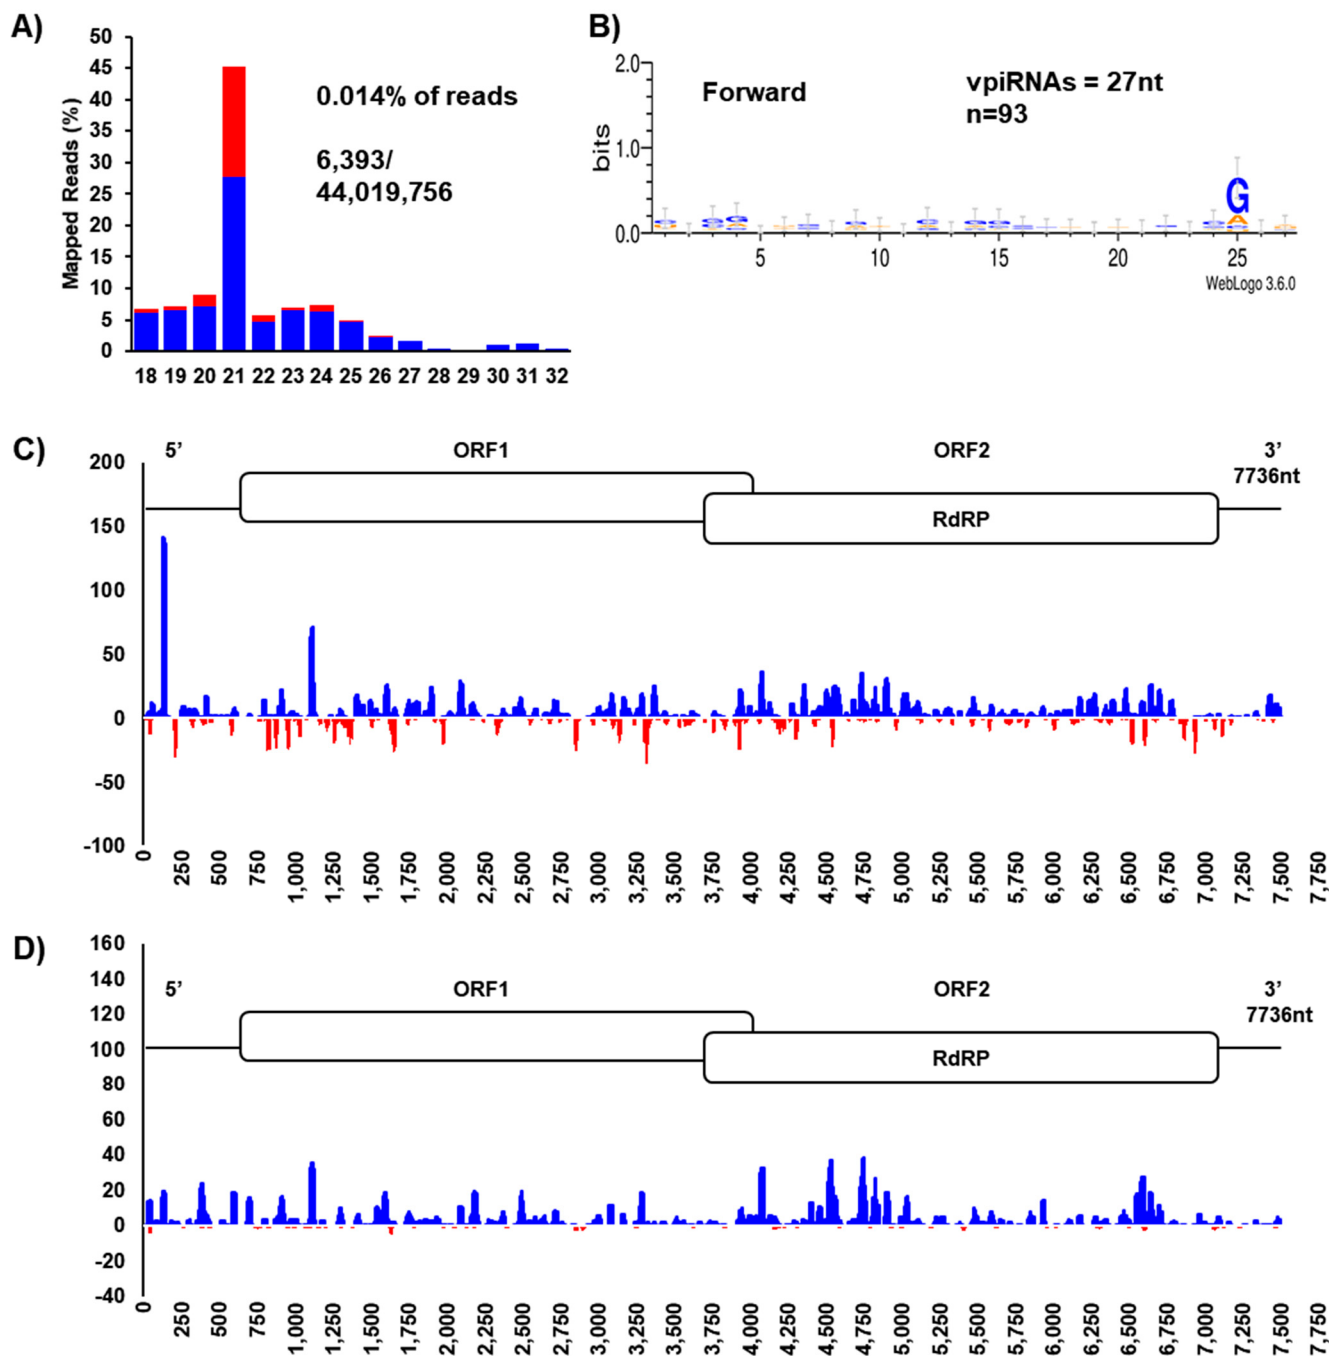

**Figure S17. Virus-derived small RNA profiles and mapping coverage plots of Aedes aegypti toti-like virus 1 (ATLV-1) in *Ae. aegypti* *in vivo*.** The bar graph represents the small-RNA reads mapping to the ATL-1 Liverpool strain **A)** with genomic sense indicated in blue and anti-genomic reads mapped indicated in red. **B)** Representation of piRNA signature logos within 27-nt reads extracted mapping in the genome direction indicating that ATL-1 does not produce vpiRNA length virus-derived RNAs with a classical vpiRNA signature. **C)** Mapping profile of vsiRNAs of 21nt in length and **D)** vpiRNAs 24-29nt. Small RNA sequencing data are taken from the Liverpool, *Ae. aegypti* colony originating from pooled life stages (BioProject Accession: PRJNA232374) (5).

## Aedes aegypti toti virus (ATV)

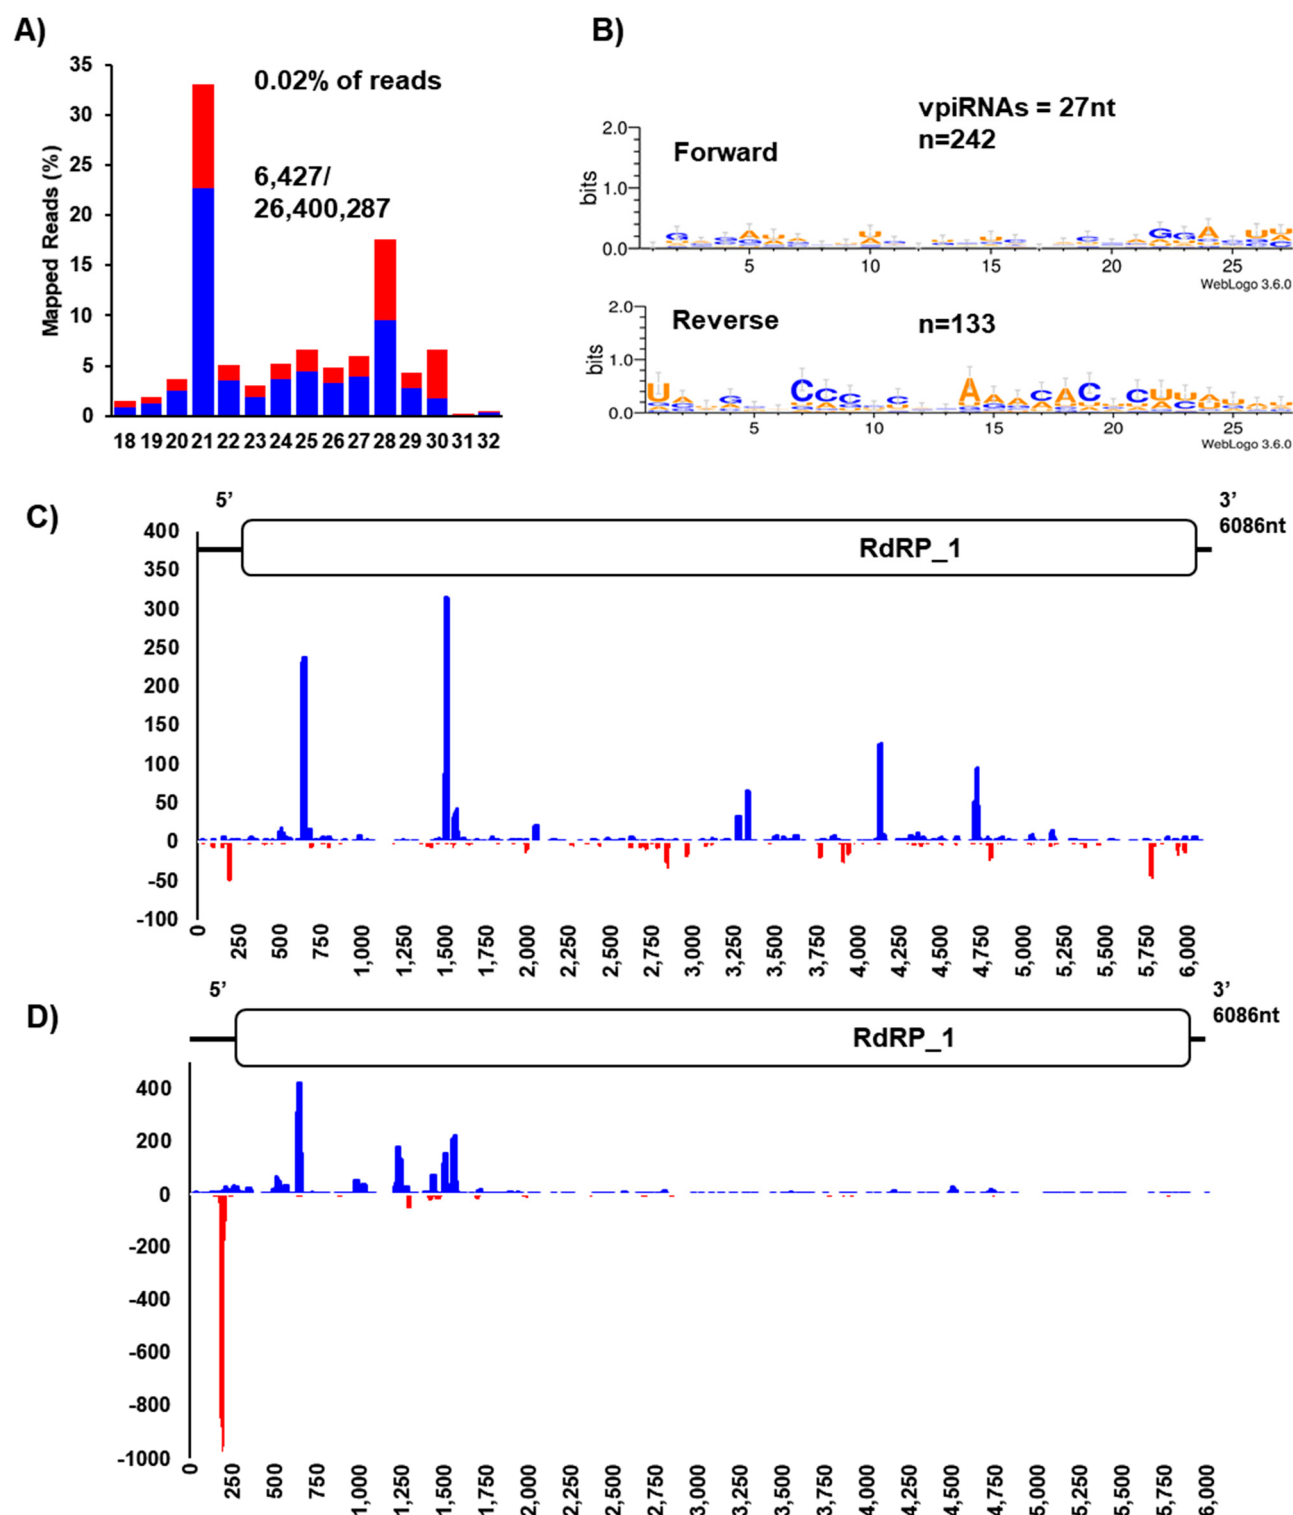

**Figure S18. Virus-derived small RNA profiles and mapping coverage plots of Aedes aegypti toti virus (ATV) in *Ae. aegypti* *in vivo*.** The bar graph represents the small-RNA reads mapping to the ATV Cairns, Australia strain **A)** with genomic sense indicated in blue and anti-genomic reads mapped indicated in red. **B)** Representation of piRNA signature logos within 27-nt reads extracted mapping in the genome and anti-genome direction indicating that ATL-2 does not produce vpiRNA length virus-derived RNAs with a classical vpiRNA signature. **C)** Mapping profile of vsiRNAs of 21nt in length and **D)** vpiRNAs 24-29nt. Small RNA sequencing data are taken from whole adult mosquitoes originating from the Cairns, Australia *Ae. aegypti* colony (BioProject accession: PRJNA255495) (6).

## Tiger mosquito bi-segmented tombus-like virus (TMTLV)

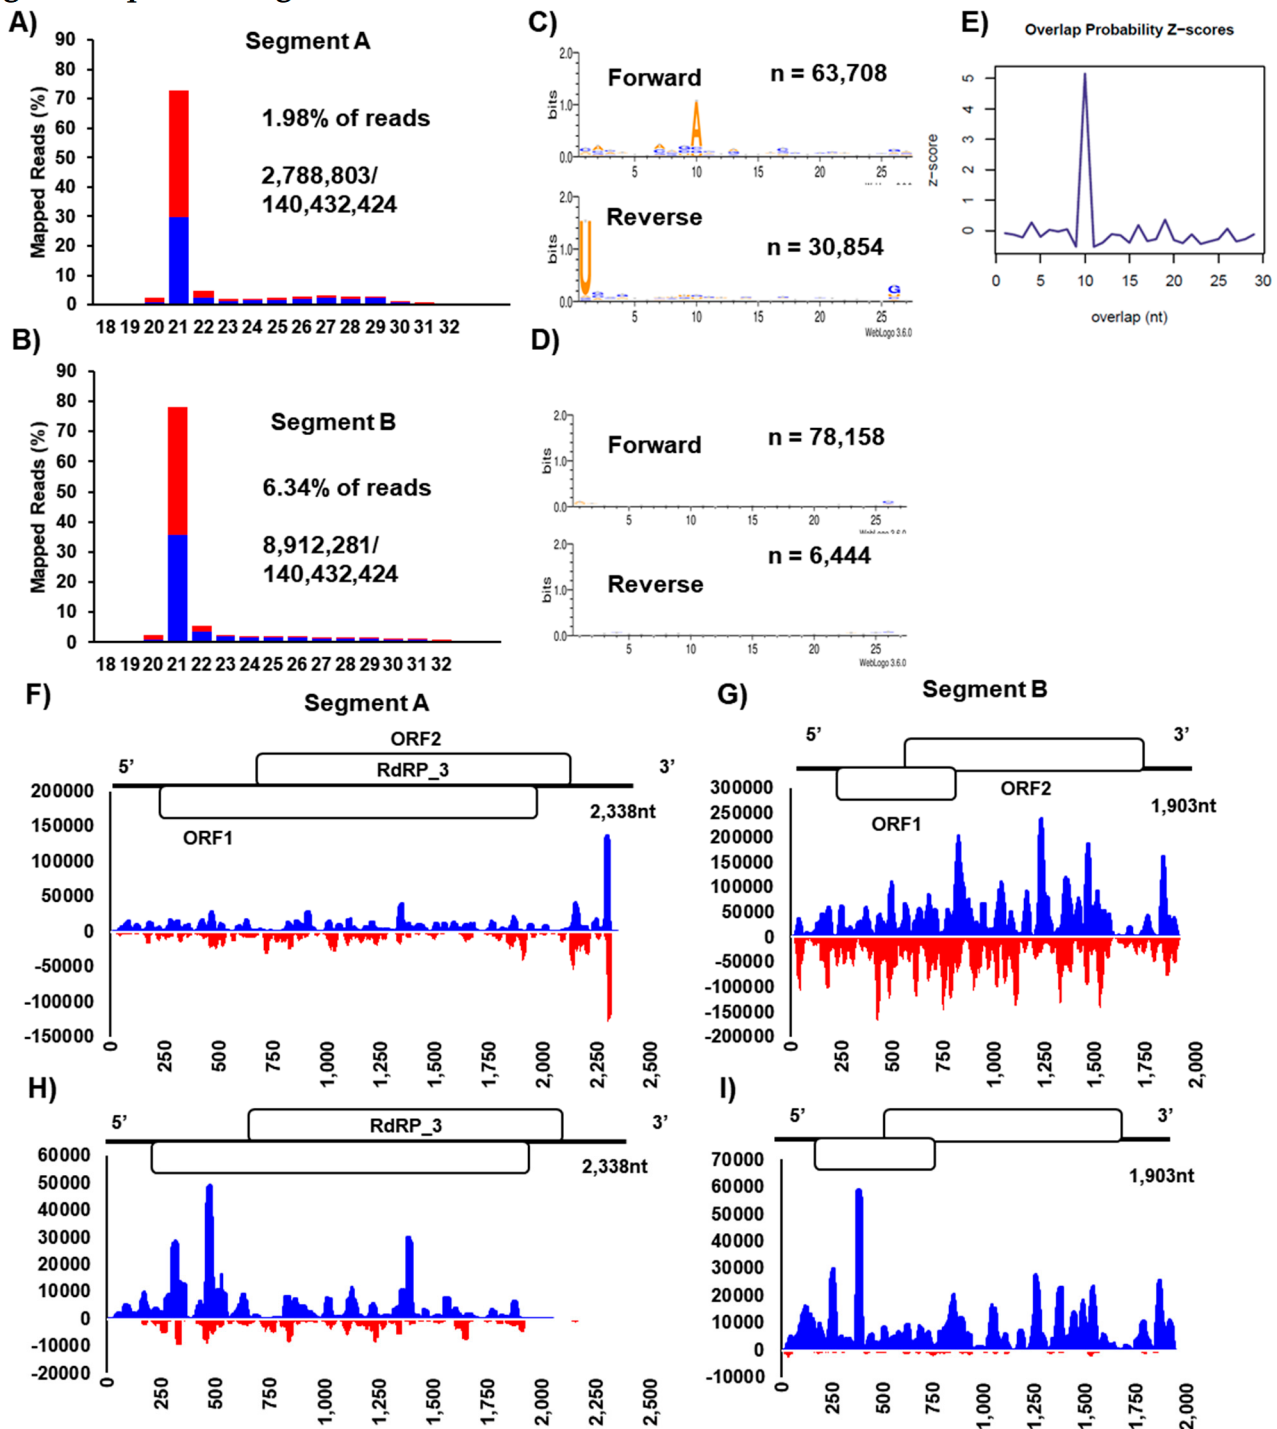

**Figure S19. Virus-derived small RNA profiles and mapping coverage plots of Tiger mosquito bi-segmented tombus-like virus (TMTLV) in *Ae. albopictus* in vivo.** The bar graph represents the small-RNA reads mapping to the A) A segment and B) B segment of TMTLV Phu Hoa strain with genomic sense indicated in blue and anti-genomic reads mapped indicated in red. Representation of piRNA signature logos within 27-nt reads extracted mapping in the genome and anti-genome direction of both TMTLV A segment C) and D) B segment indicating that TMTLV produces vpiRNA length virus-derived RNAs with a classical vpiRNA signature for the A segment. E) Graphic representation of overlap probability of identified 24-29nt small RNA pairs and associated z-scores for the A segment. Mapping profile of vsiRNAs of 21nt in length to the F) A segment and G) B segment. Mapping profile of vpiRNAs 24-29nt mapping to the H) A segment and I) B segment. Small RNA sequencing data are taken from whole adult mosquitoes originating from the Phu Hoa, Ben Cat District, Binh Duong Province, Vietnam *Ae. albopictus* colony (BioProject accession: PRJNA293817) (3).

# Aedes orbi-like virus (AOLV)

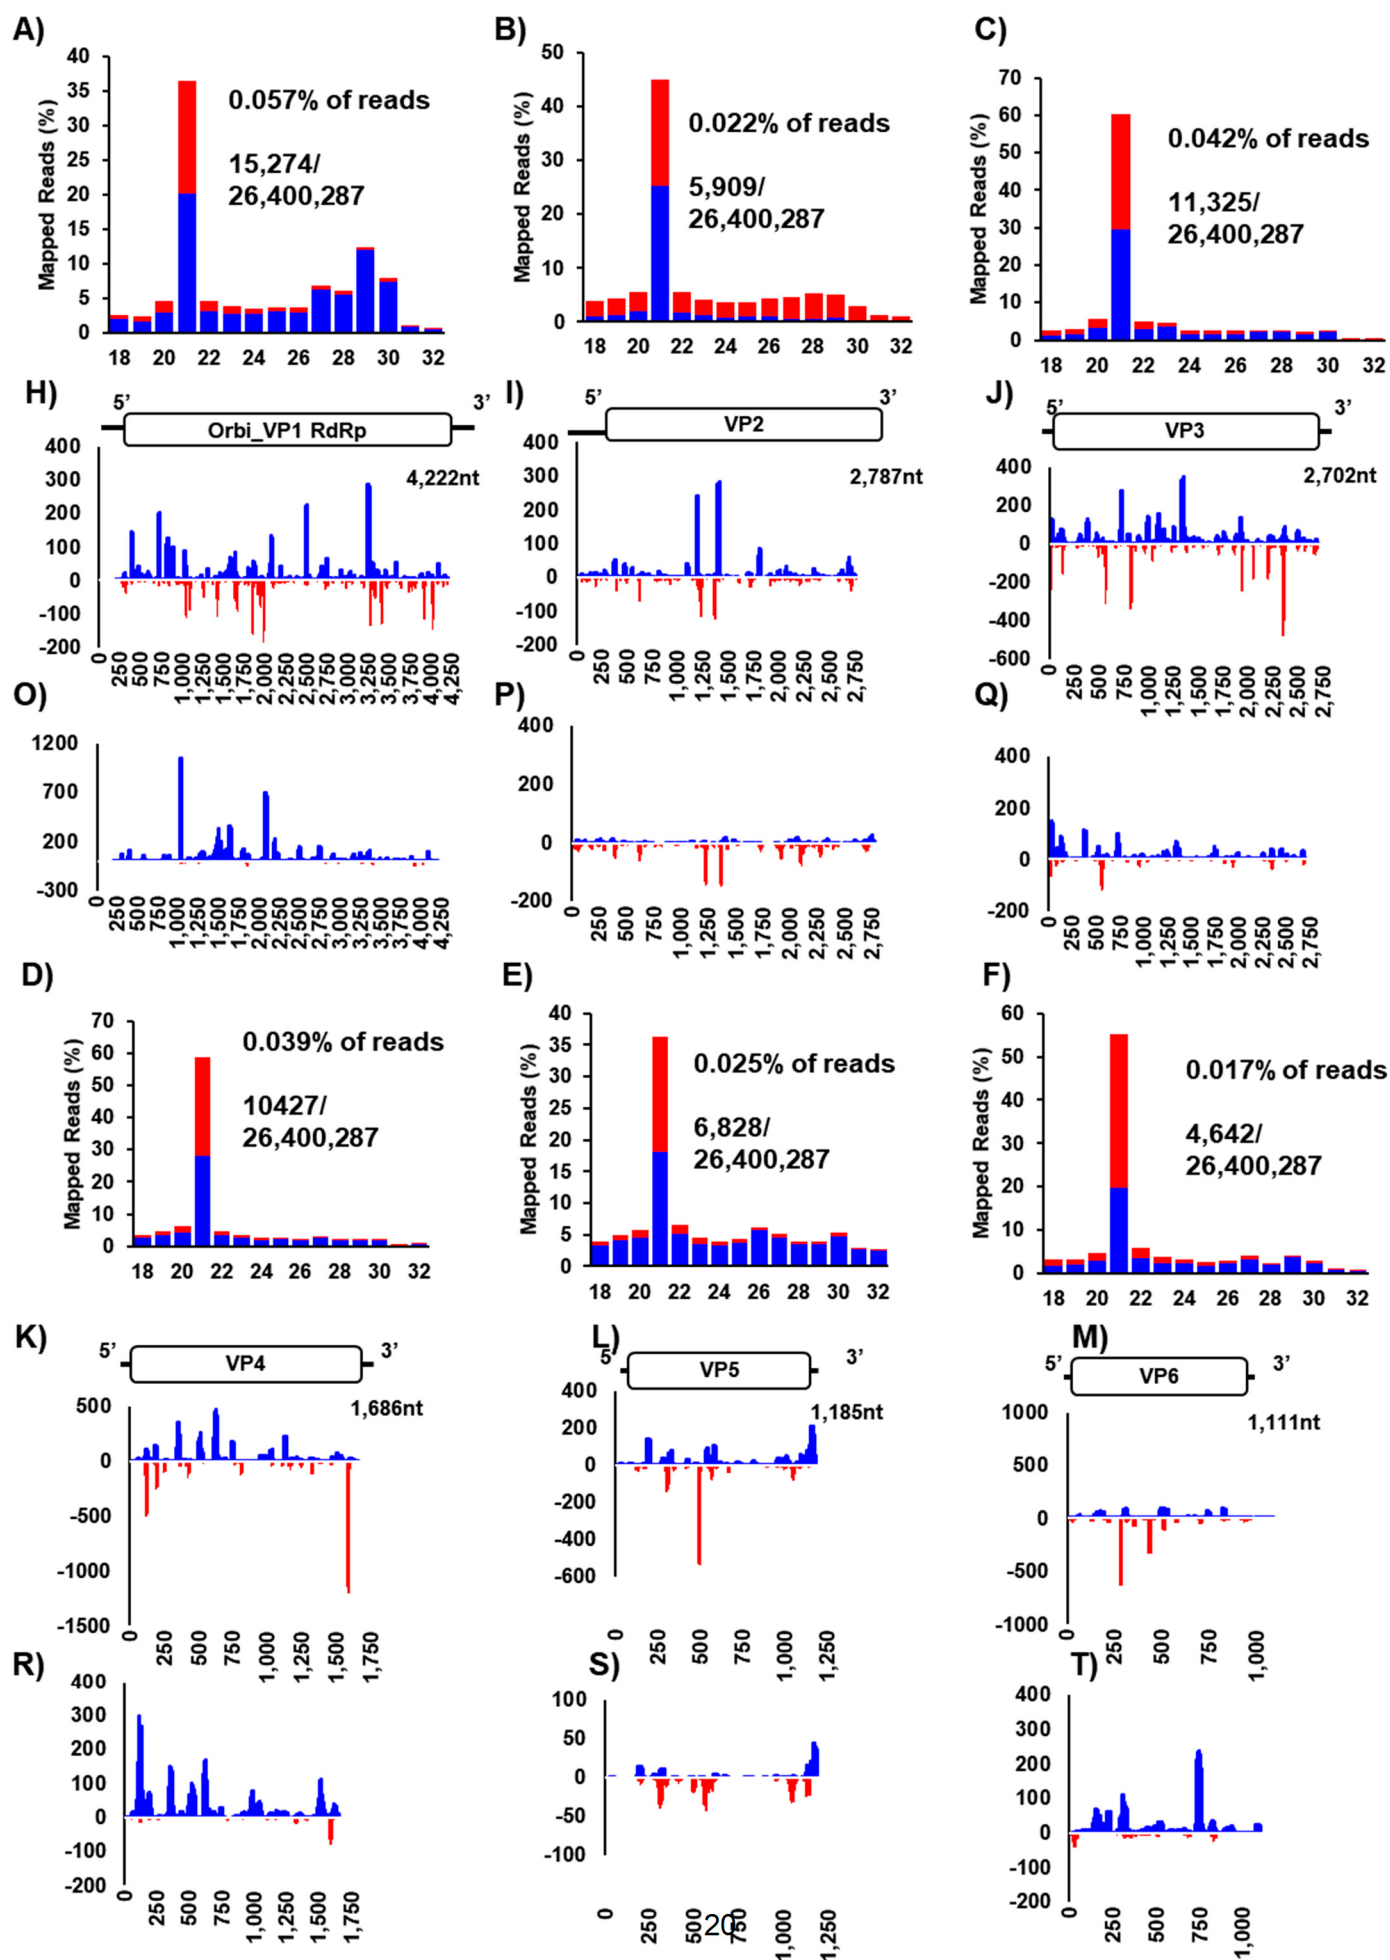

# Aedes orbi-like (AOLV) Continued

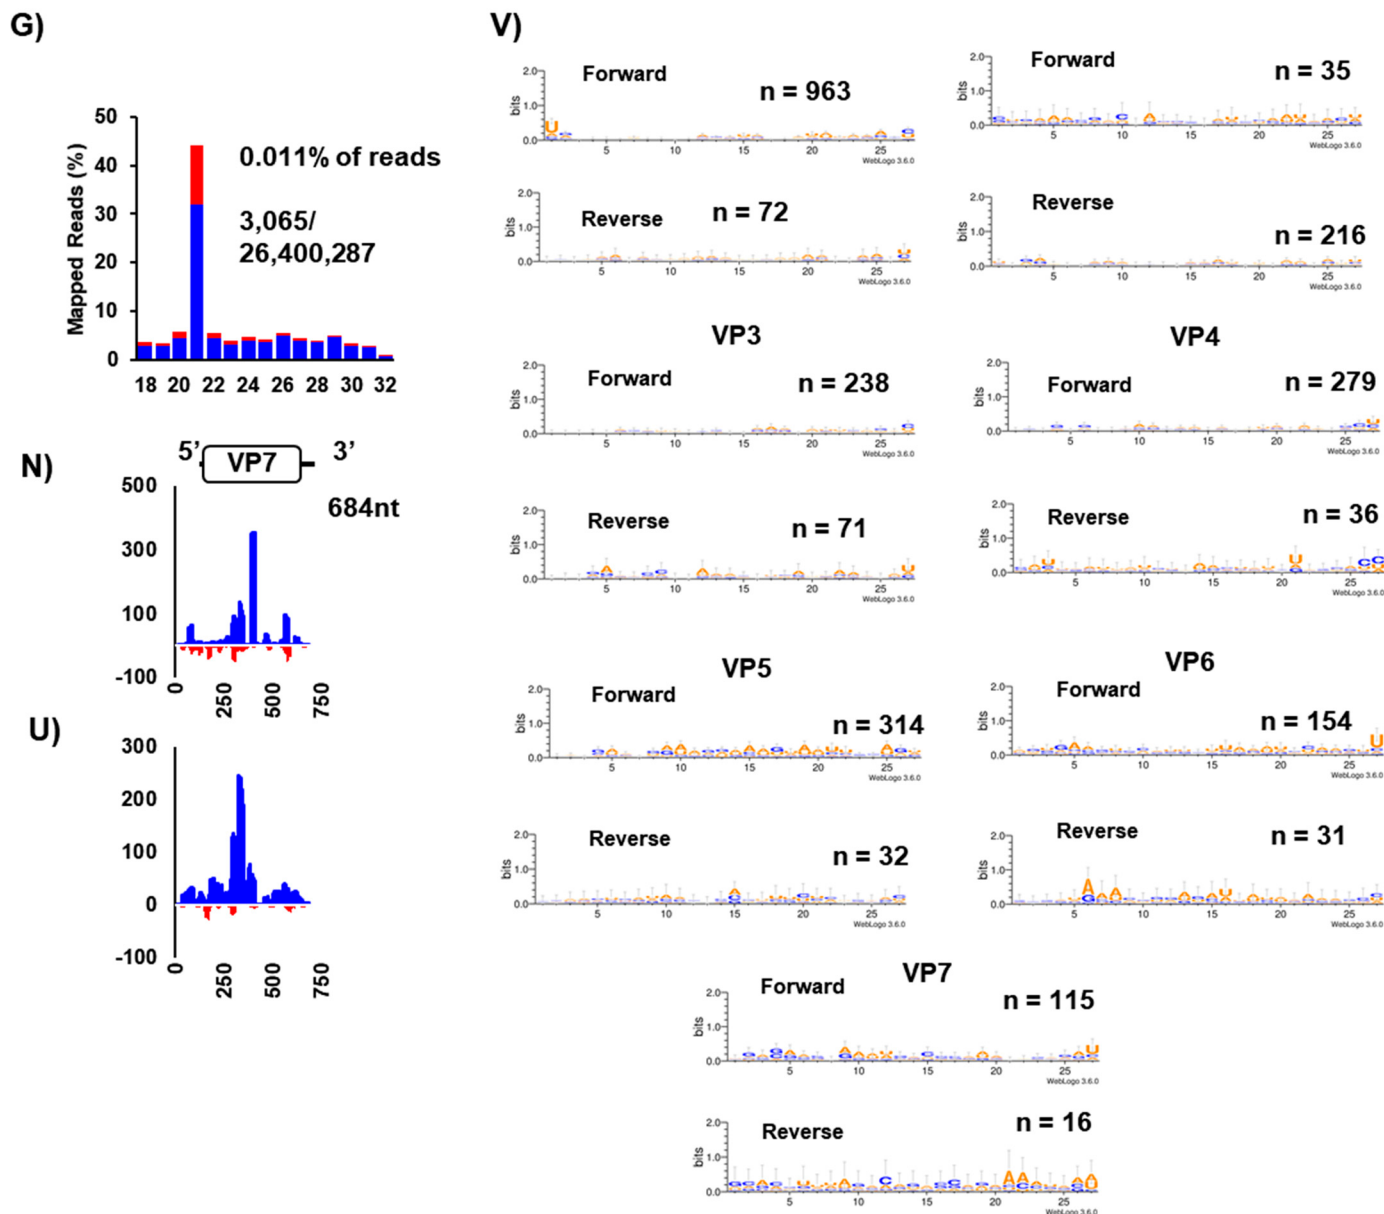

**Figure S20. Virus-derived small RNA profiles and mapping coverage plots of Aedes orbi-like virus (AOLV) in *Ae. aegypti* *in vivo*.** The bar graph represents the small-RNA reads mapping to the AOLV Cairns, Australia strain A) with genomic sense indicated in blue and anti-genomic reads mapped indicated in red to all 7 segments A-G. Mapping profile of vsiRNAs of 21nt in length H-N) vpiRNAs 24-29nt. V) Representation of piRNA signature logos within 27-nt reads extracted mapping in the genome and anti-genome direction indicating that AOV01 does not produce vpiRNA length virus-derived RNAs with a classical vpiRNA signature. Small RNA sequencing data are taken from the Cairns, Australia *Ae. aegypti* colony originating from whole blood-fed adult mosquitoes (BioProject accession: PRJNA255495) (6).

## Aedes binegeev-like virus 1 (AeBNV-1)

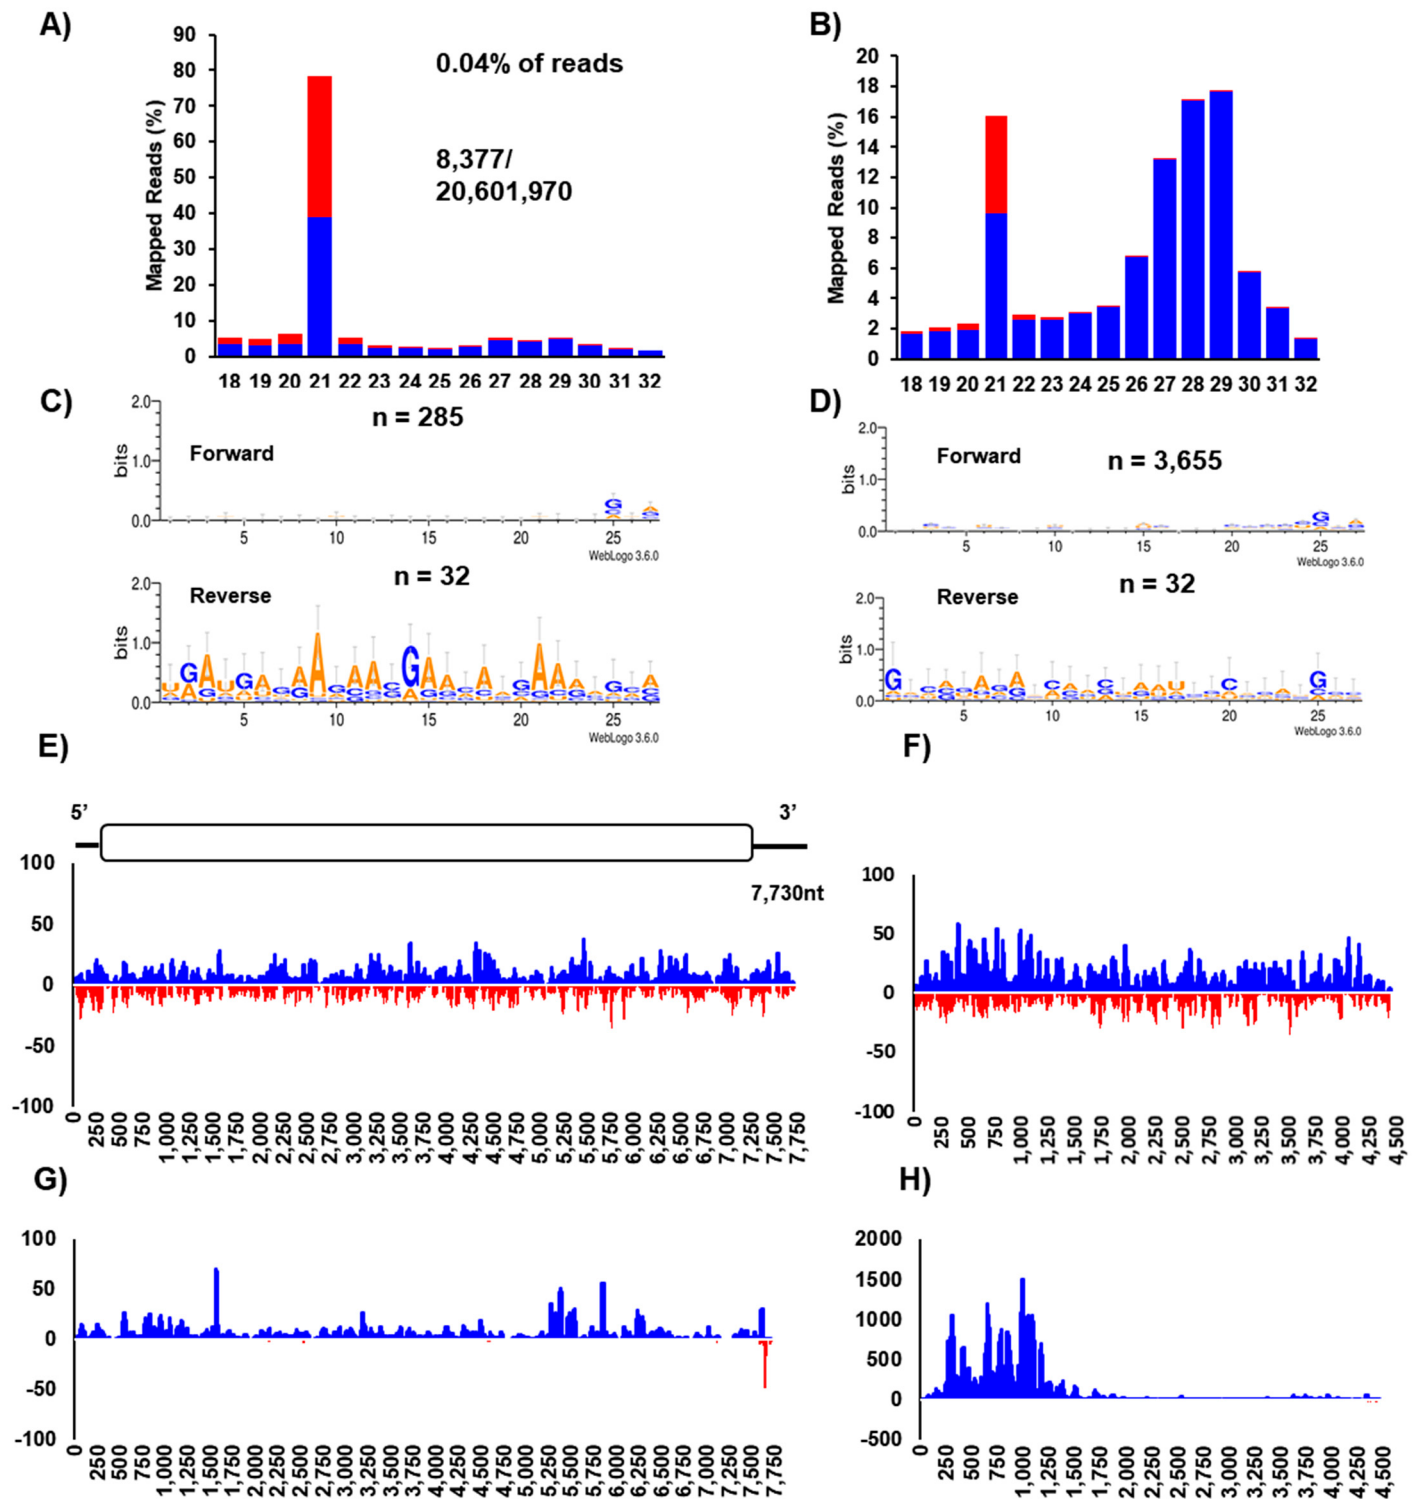

**Figure S21. Virus-derived small RNA profiles and mapping coverage plots of Aedes binegeev like virus 1 (AeBNV-1) in *Ae. aegypti* in vivo.** The bar graph represents the small-RNA reads mapping to the **A)** L segment and **B)** S segment of AeBNV-1 Miami laboratory strain with genomic sense indicated in blue and anti-genomic reads mapped indicated in red. Representation of piRNA signature logos within 27-nt reads extracted mapping in the genome and anti-genome direction of both AeBNV-1 L segment **C)** and **D)** S segment indicating that AeBNV-1 does not produce vpiRNA length virus-derived RNAs with a classical vpiRNA signature. Mapping profile of vsiRNAs of 21nt in length to the **E)** L segment and **F)** S segment. Mapping profile of vpiRNAs 24-29nt mapping to the **G)** L segment and **H)** S segment. Small RNA sequencing data are taken from the Miami, USA *Ae. aegypti* colony originating from pooled soma and ovary libraries (Bioproject Accession: PRJNA386859) (2).

## Liverpool tombus-like virus (previously Mosquito Nodavirus)

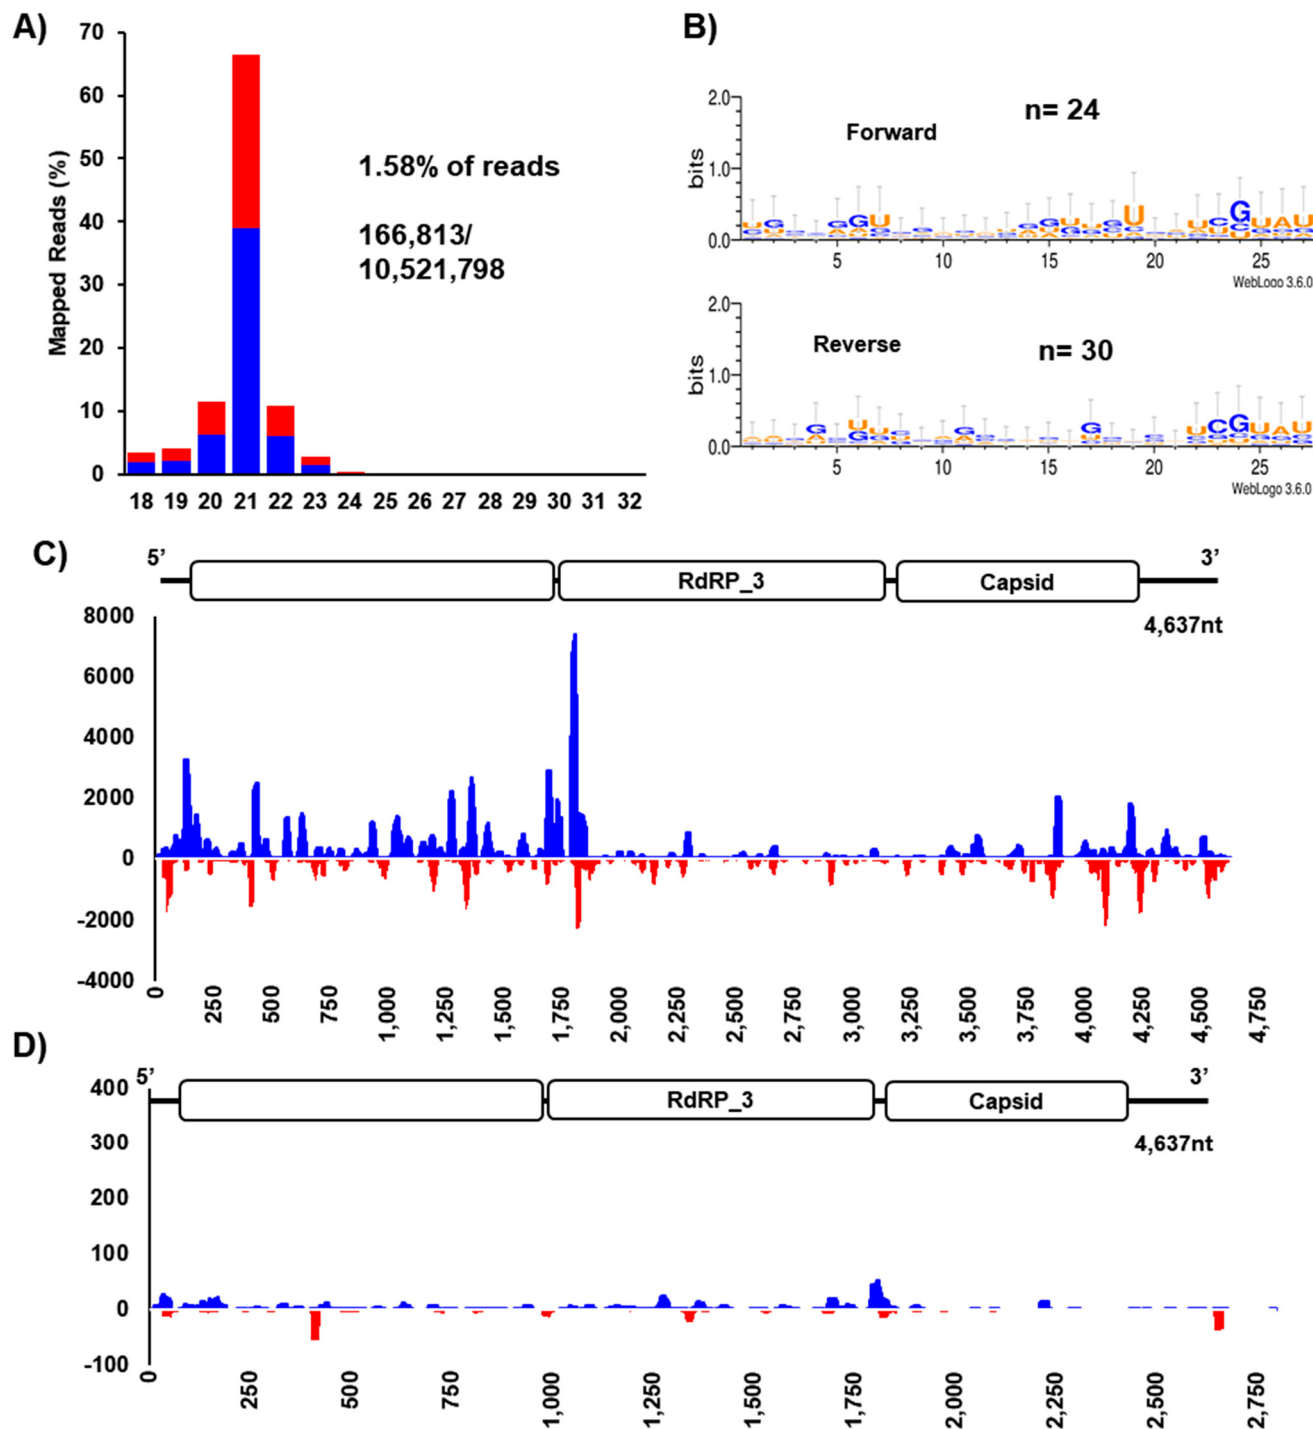

**Figure S22. Virus-derived small RNA profiles and mapping coverage plots of Liverpool tombus-like virus (LPTV) in *Ae. aegypti* in vivo.** The bar graph represents the small-RNA reads mapping to the LPTV genome **A)** with genomic sense indicated in blue and anti-genomic reads mapped indicated in red. **B)** Representation of piRNA signature logos within 27-nt reads extracted mapping in the genome direction indicating that LPTV does not produce vpiRNA length virus-derived RNAs with a classical vpiRNA signature. **C)** Mapping profile of vsiRNAs of 21nt in length, and **D)** vpiRNAs 24-29nt. Small RNA sequencing data are taken from the Liverpool, *Ae. aegypti* colony originating adult samples (BioProject accession: PRJNA150789)(7).

## Yongsan tombus-like virus 1 (YTLV) - Foshan Strain

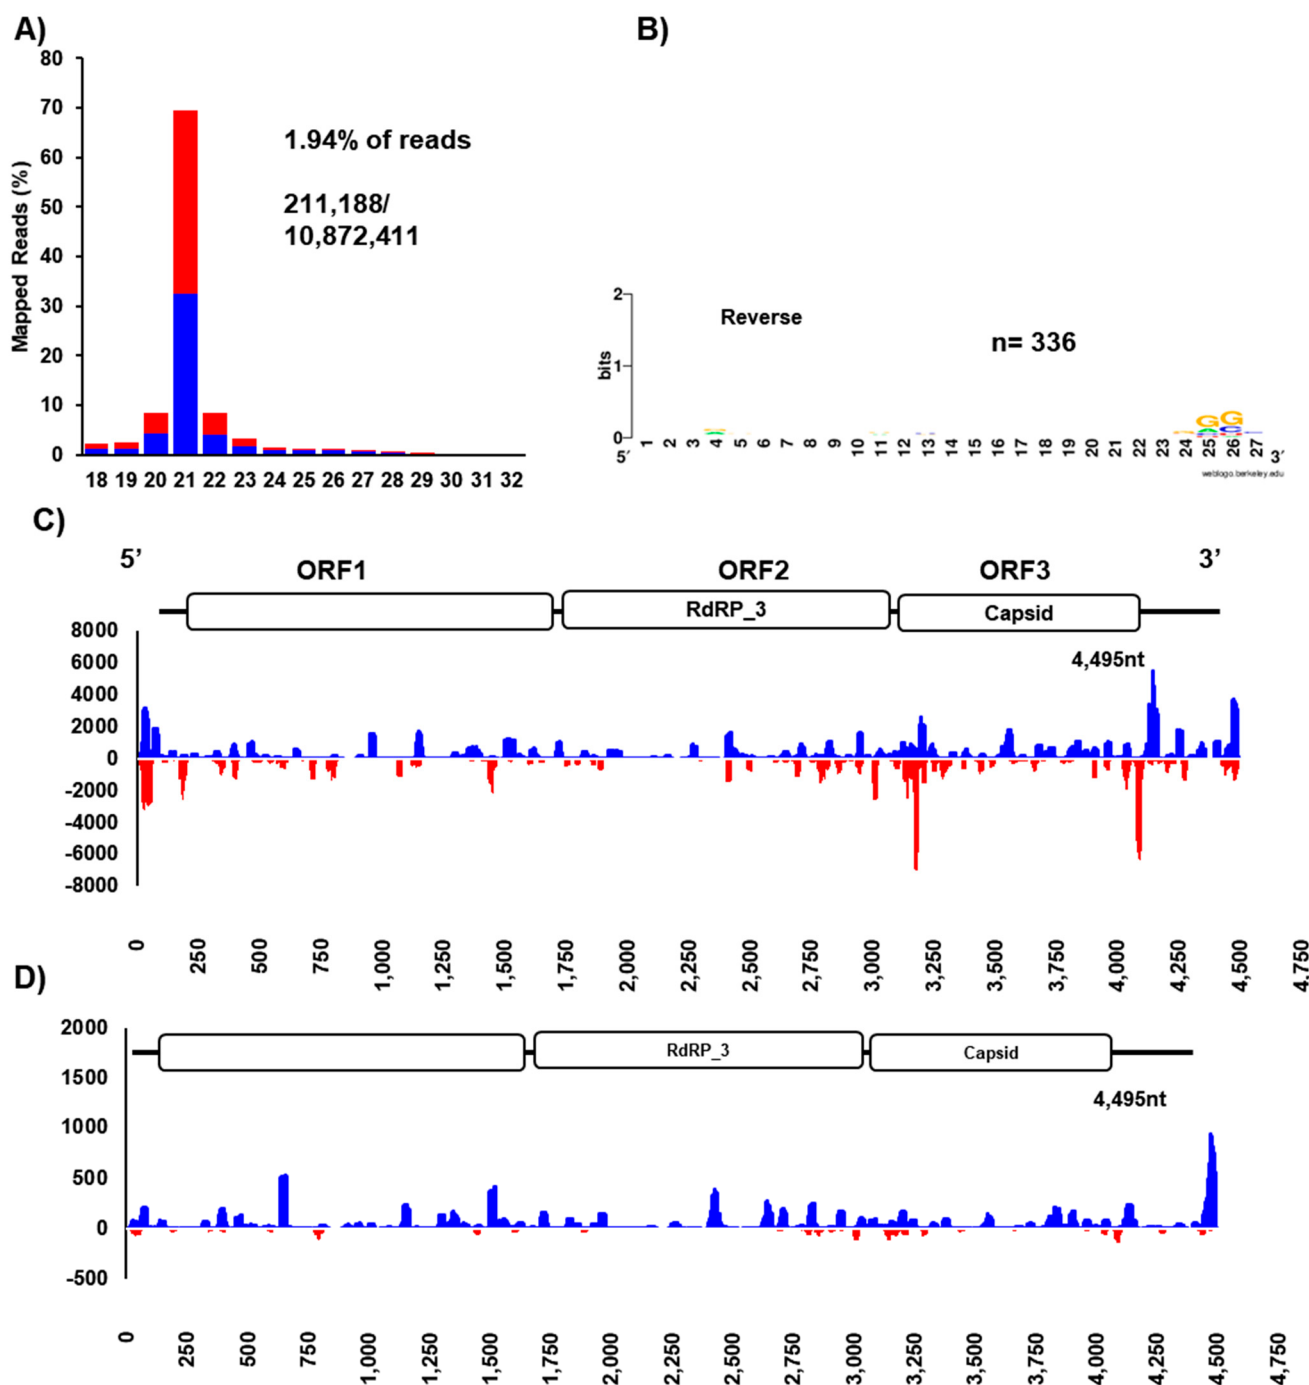

**Figure S23. Virus-derived small RNA profiles and mapping coverage plots of Yongsan tombus-like virus 1 (YTLV) in *Ae. albopictus* in vivo.** The bar graph represents the small-RNA reads mapping to the YTLV genome. **A)** with genomic sense indicated in blue and anti-genomic reads mapped indicated in red. **B)** Representation of piRNA signature logos within 27-nt reads extracted mapping in the anti-genome (reverse) direction indicating that YTLV does not produce vpiRNA length virus-derived RNAs with a classical vpiRNA signature. **C)** Mapping profile of vsiRNAs of 21nt in length, and **D)** vpiRNAs 24-29nt. Small RNA sequencing data are taken from the Foshan, *Ae. albopictus* colony (BioProject accession: PRJNA236401)(8).

# Aedes phasma virus (APV)

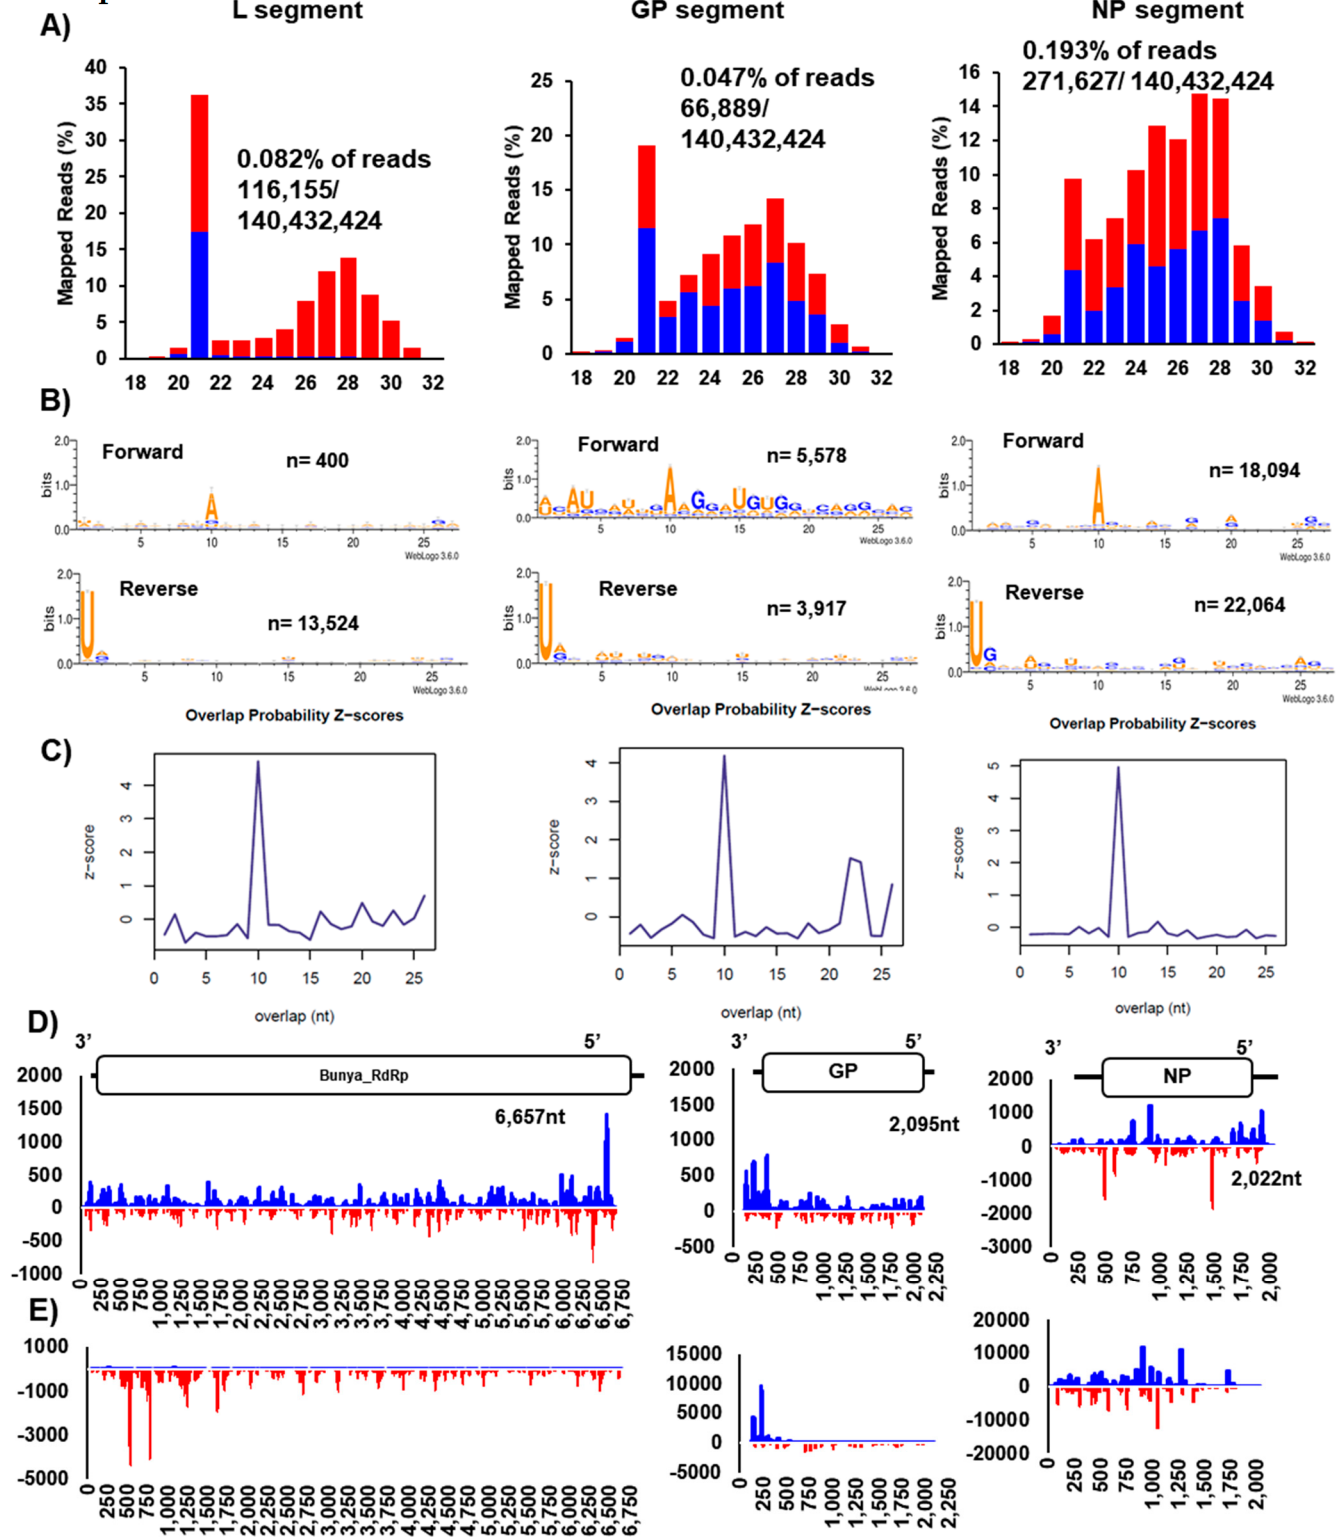

**Figure S24. Virus-derived small RNA profiles and mapping coverage plots of *Aedes phasma* virus (APV) in *Ae. albopictus* *in vivo*.** The bar graph represents the small-RNA reads mapping to **A)** the three genome segments of APV Phu Hoa strain with genomic sense indicated in blue and anti-genomic reads mapped shown in red. Representation of piRNA signature logos **B)** within 27-nt reads extracted mapping in the genome and anti-genome direction of the three segments of APV. Graphic representation of overlap probability **C)** of identified 24-29nt small RNA pairs and associated z-scores for the three segments. **D)** Mapping profile of vsiRNAs of 21nt in length to the three genome segments. Mapping profile of vpiRNAs (24-29nt) **E)** mapping to the three segments of APV. The small RNA sequencing data are taken from whole adult mosquitoes originating from the Phu Hoa, Ben Cat District, Binh Duong Province, Vietnam *Ae. albopictus* colony (BioProject accession: PRJNA293817) (3).

## Guadeloupe mosquito quaranja-like virus 1 (GMQLV-1)

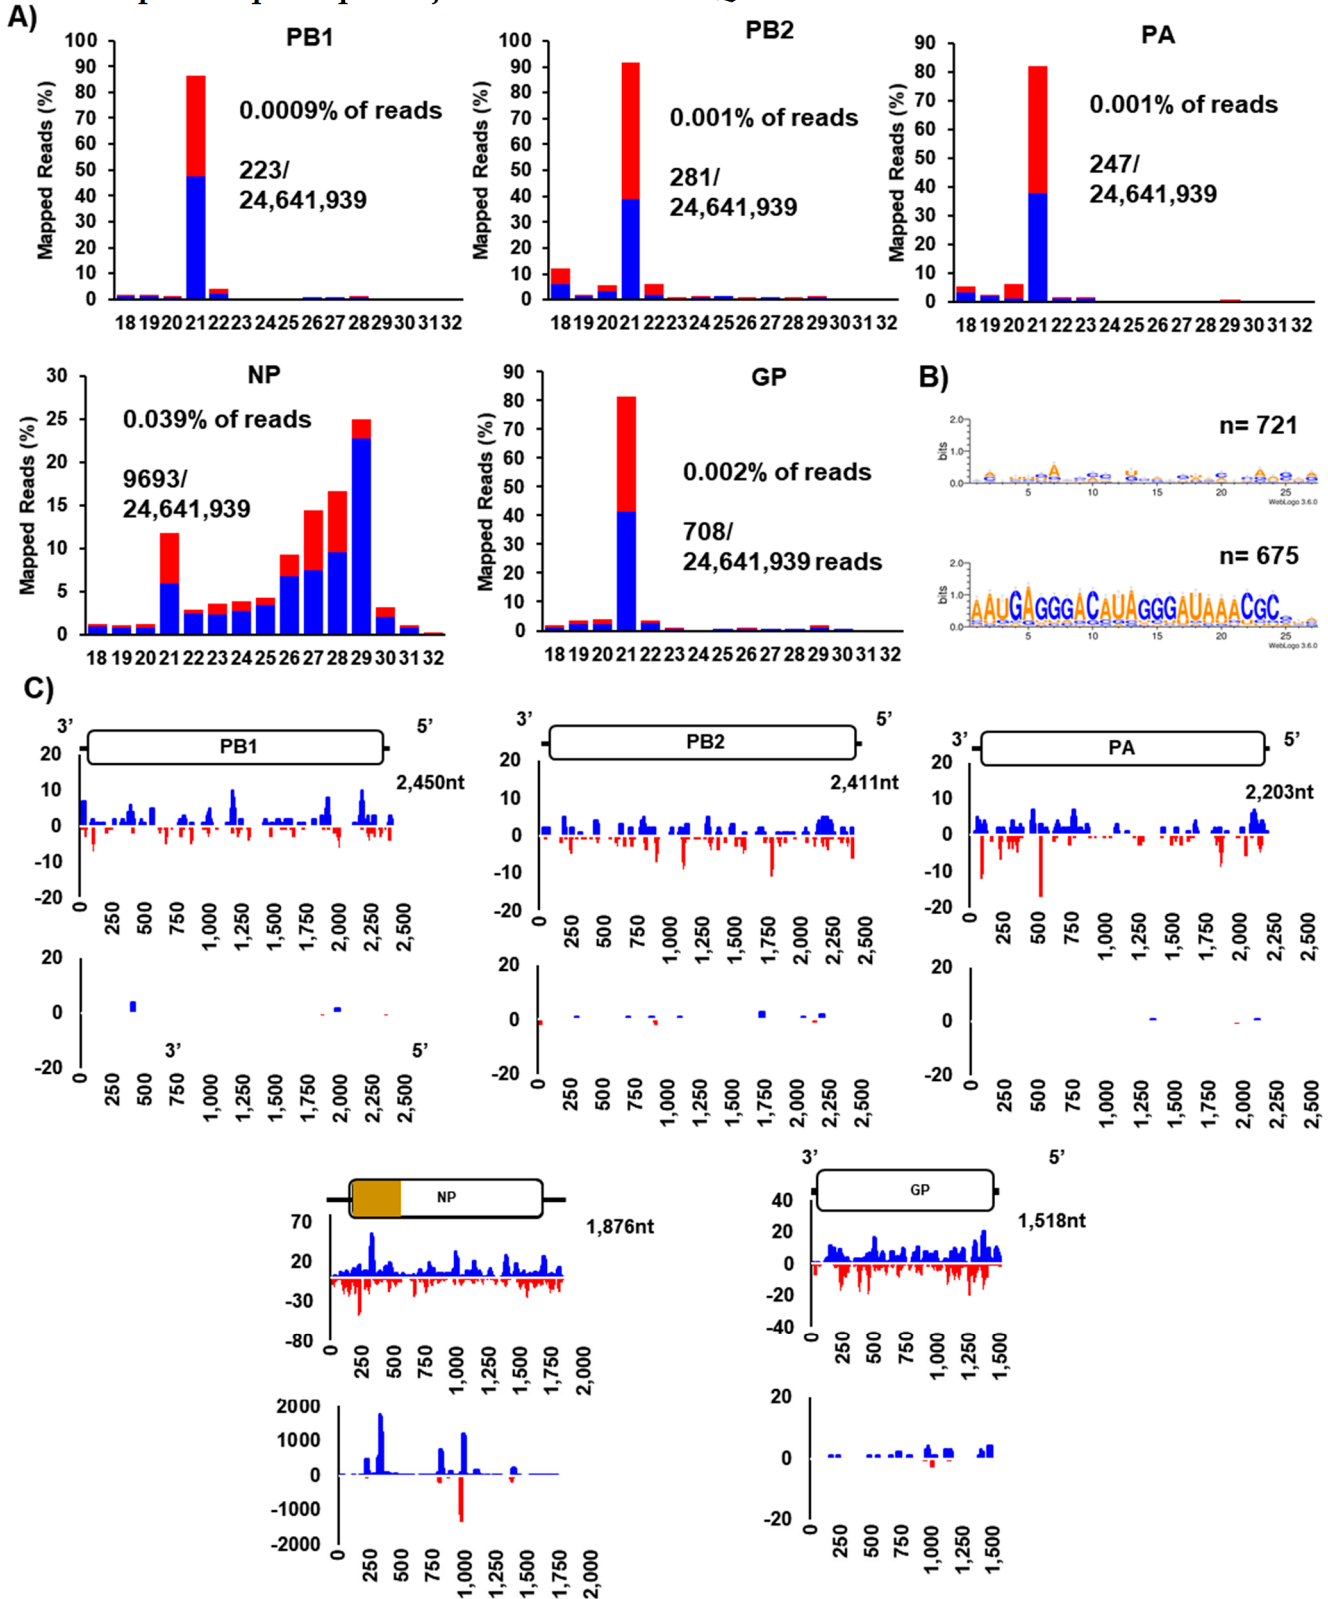

**Figure S25. Virus-derived small RNA profiles and mapping coverage plots of Guadeloupe mosquito quaranja-like virus 1 (GMQLV-1) in *Ae. aegypti* in vivo.** A) The bar graph represents the small-RNA reads mapping to the GMQLV-1 Miami, Laboratory strain with genomic sense indicated in blue and anti-genomic reads mapped indicated in red to all 5 segments PB1, PB2, PA, NP, GP B) Representation of piRNA signature logos within 27-nt reads extracted mapping in the genome, and anti-genome direction of the NP segment indicates that GMQLV-1 does not produce vpiRNA length virus-derived RNAs with a classical vpiRNA signature. C) Mapping profile of vsiRNAs of 21nt in length and vpiRNAs 24-29nt. Small RNA sequencing data are taken from the Miami, USA *Ae. aegypti* colony originating from pooled soma and ovary libraries (BioProject Accession: PRJNA386859) (2).

## Culex pipiens pallens densovirus (CppDNV)

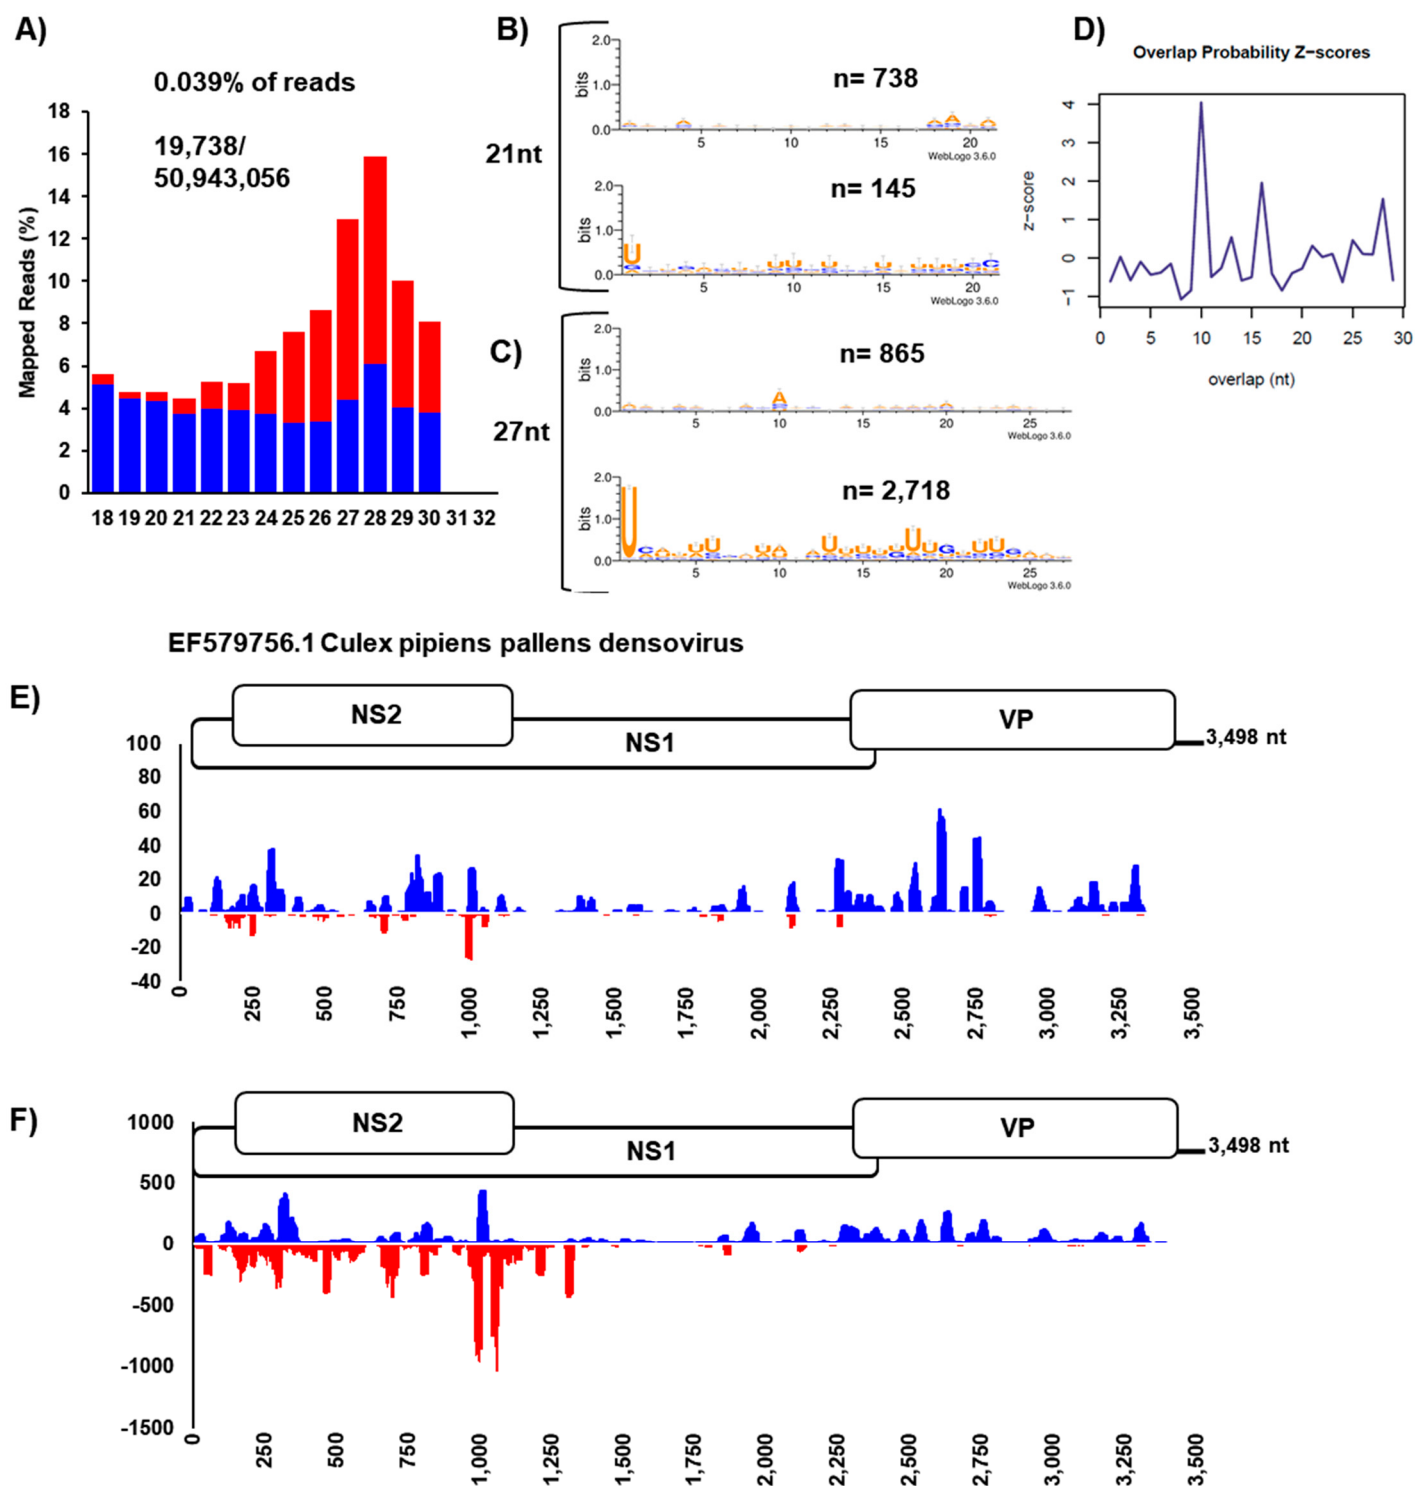

**Figure S26.** Virus-derived small RNA profiles and mapping coverage plots of *Culex pipiens pallens* densovirus (CppDNV) in *Ae. albopictus* C6/36 cells. **A)** The bar graph represents the small-RNA reads mapping to the CppDNV strain available on Genbank EF579756.1 with genomic sense indicated in blue and anti-genomic reads mapped indicated in red. Representation of piRNA signature logos within extracted **B)** 21nt and **C)** 27-nt reads mapping to the genome and anti-genome direction of the genome indicating that CppDNV produces vpiRNA length virus-derived RNAs with a classical vpiRNA signature. **D)** Graphical representation of the position of identified 21-29nt overlapping small RNA pairs and associated z-scores. **E)** Mapping profile of vsiRNAs of 21nt in length. **F)** Mapping profile of vpiRNAs 24-29nt mapping to the genome. Small RNA sequencing data are taken from the *Ae. albopictus* C6/36 cell line (BioProject accession: PRJNA374578)(9).

## Supplementary File 2: References

1. Morazzani EM, Wiley MR, Murreddu MG, Adelman ZN, Myles KM. 2012. Production of virus-derived ping-pong-dependent piRNA-like small RNAs in the mosquito soma. *PLoS Pathog* 8:e1002470.
2. Lewis SH, Quarles KA, Yang Y, Tanguy M, Frézal L, Smith SA, Sharma PP, Cordaux R, Gilbert C, Giraud I. 2017. Pan-arthropod analysis reveals somatic piRNAs as an ancestral defence against transposable elements. *Nat Ecol Evol* 2: 174-181.
3. Goic B, Stapleford KA, Frangeul L, Doucet AJ, Gausson V, Blanc H, Schemmel-Jofre N, Cristofari G, Lambrechts L, Vignuzzi M, Saleh MC. 2016. Virus-derived DNA drives mosquito vector tolerance to arboviral infection. *Nat Commun* 7:12410.
4. Saldana MA, Etebari K, Hart CE, Widen SG, Wood TG, Thangamani S, Asgari S, Hughes GL. 2017. Zika virus alters the microRNA expression profile and elicits an RNAi response in *Aedes aegypti* mosquitoes. *PLoS Negl Trop Dis* 11:e0005760.
5. Hu W, Criscione F, Liang S, Tu Z. 2015. MicroRNAs of two medically important mosquito species: *Aedes aegypti* and *Anopheles stephensi*. *Insect Mol Biol* 24:240-52.
6. Etebari K, Osei-Amo S, Blomberg SP, Asgari S. 2015. Dengue virus infection alters post-transcriptional modification of microRNAs in the mosquito vector *Aedes aegypti*. *Sci Rep* 5:15968.
7. Adelman ZN, Anderson MA, Liu M, Zhang L, Myles KM. 2012. Sindbis virus induces the production of a novel class of endogenous siRNAs in *Aedes aegypti* mosquitoes. *Insect Mol Biol* 21:357-68.
8. Liu YX, Zhou YH, Wu JY, Zheng PM, Li YJ, Zheng XY, Puthiyakunnon S, Tu ZJ, Chen XG. 2015. The expression profile of *Aedes albopictus* miRNAs is altered by dengue virus serotype-2 infection. *Cell Biosci* 5: 16.
9. Avila-Bonilla RG, Yocupicio-Monroy M, Marchat LA, De Nova-Ocampo MA, del Angel RM, Salas-Benito JS. 2017. Analysis of the miRNA profile in C6/36 cells persistently infected with dengue virus type 2. *Virus Res* 232:139-151.
