# Supplementary material for: Uncovering the Worldwide Diversity and Evolution of the Virome of the Mosquitoes Aedes aegypti and Aedes albopictus
Source: Microorganisms. 2021 Aug 3;9(8):1653. doi: 10.3390/microorganisms9081653 (PMC8398489; doi:10.3390/microorganisms9081653)
Supplement: Supplementary file 1 [file microorganisms-09-01653-s001.zip › Supplementary Tables_proof.pdf]

Table S1. All *Ae. aegypti* samples analysed in this study and associated publications

| Colony designation, City and country of original catch and Accession number                                                                                         | Date of original catch/ Date and generation (g) of sequencing                                                                       | Wild-caught/ Field derived strain/ Laboratory strain                                   | Total-RNA or sRNA sequencing                                                                                                               | Tissues sequenced                                                                                                                                                    | REF  |
|---------------------------------------------------------------------------------------------------------------------------------------------------------------------|-------------------------------------------------------------------------------------------------------------------------------------|----------------------------------------------------------------------------------------|--------------------------------------------------------------------------------------------------------------------------------------------|----------------------------------------------------------------------------------------------------------------------------------------------------------------------|------|
| <b>African Samples</b>                                                                                                                                              |                                                                                                                                     |                                                                                        |                                                                                                                                            |                                                                                                                                                                      |      |
| Bakoumba, Gabon<br>BioProject accession: PRJNA386453                                                                                                                | Wild-caught: ~2014<br>Deposited in SRA: 2017-05-12                                                                                  | Field derived strain                                                                   | <b>mRNA, polyA enriched</b>                                                                                                                | Individual midgut libraries or whole mosquitoes                                                                                                                      | (1)  |
| Rabai, Kenya (K2, K4, K14, K18, K19, K27)<br>BioProject accession: PRJNA233429                                                                                      | Collected: January 2009<br>Sequenced: 2010-2011, g5/g8<br>Deposited in SRA: 2014-01-04                                              | Field derived strain                                                                   | <b>mRNA, polyA enriched</b><br>Illumina TruSeq RNA Sample Prep Kit v. 2 and mRNA Sequencing Sample Prep Kit.                               | Antenna                                                                                                                                                              | (2)  |
| Rabai, Kenya (GP1, GP2, HP1, HP2)<br>BioProject accession: PRJNA233429                                                                                              | Collected: January 2009<br>Sequenced: 2010-2011, F2 of K27(G5) and K14(G5) cross<br>Deposited in SRA: 2014-01-04                    | Field derived strain                                                                   | <b>mRNA, polyA enriched</b><br>As above                                                                                                    | Antenna                                                                                                                                                              | (2)  |
| Shauri Moyo (Moyo-S/R), Mombasa, Kenya<br>BioProject accession: PRJNA396016                                                                                         | Collected: ~1980s<br>Deposited in SRA: 2017-07-27                                                                                   | Lab strain                                                                             | <b>sRNA sequencing</b><br>Epicentre ScriptMiner kit (Cat. No. SMMP101212)                                                                  | Second, third, fourth instar larvae and adults                                                                                                                       | (3)  |
| Bundibugyo (U30), Uganda<br>BioProject accession: PRJNA233429                                                                                                       | Collected: January 2009<br>Sequenced: 2010-2011, g3<br>Deposited in SRA: 2014-01-04                                                 | Field derived strain                                                                   | <b>mRNA, polyA enriched</b><br>As above                                                                                                    | Antenna                                                                                                                                                              | (2)  |
| Wakiso, Uganda<br>BioProject accession: PRJNA556544                                                                                                                 | Collected: 2016<br>Deposited in SRA: 2019-07-25                                                                                     | Mosquito homogenates passed on c6/36 cells.                                            | <b>ViralRNA-</b> RNA extracted using QIAamp Viral RNA Mini Kit (Qiagen)<br>Library preparation using Nextera XT DNA Kit (Illumina)         | Cell culture isolated virus from a laboratory colony of <i>Aedes aegypti</i> homogenised and passaged in c6/36 cells 2 passages.                                     | (4)  |
| <b>Australian / Asian Samples</b>                                                                                                                                   |                                                                                                                                     |                                                                                        |                                                                                                                                            |                                                                                                                                                                      |      |
| Cairns, Queensland, Australia<br>BioProject accession: PRJNA413709                                                                                                  | Collected: March-June 2014<br>Deposited in SRA: 2017-10-09                                                                          | Wild pools                                                                             | <b>Total-RNA, Ribosomal-RNA depleted</b>                                                                                                   | Pooled whole mosquitoes                                                                                                                                              | (5)  |
| Cairns, Queensland, Australia<br>Available on FigShare:<br><a href="https://doi.org/10.26180/5bb0d5ae69035">https://doi.org/10.26180/5bb0d5ae69035</a>              | Collected in Cairns in March 2014, continually maintained                                                                           | Field derived strain                                                                   | <b>mRNA, polyA enriched</b><br>Illumina TruSeq Stranded mRNA-Seq                                                                           | Pooled whole mosquitoes                                                                                                                                              | (6)  |
| North Queensland Strain, Australia<br>BioProject accession: PRJNA255495                                                                                             | Origin: Cairns<br>Collected prior to 2013<br>Deposited in GEO: 2014-07-17                                                           | Field derived strain                                                                   | <b>sRNA sequencing</b><br>Illumina TruSeq Small RNA                                                                                        | Pooled whole mosquitoes                                                                                                                                              | (7)  |
| Innisfail, North Queensland, Australia<br>BioProject accession: PRJNA630779                                                                                         | Collected: 2016-04<br>Deposited in SRA: 2020-05-06                                                                                  | Field derived strain                                                                   | Poly(A) mRNA isolation & Ribo-Zero rRNA removal Kit (Illumina)                                                                             | Female adult bodies with wings and legs removed (n=6)                                                                                                                | (8)  |
| Innisfail North Queensland, Australia<br>BioProject accession: PRJNA545086                                                                                          | Wild collected April 2017, and the F3-5 generations were used for the experiments.<br>Deposited in SRA: May 28, 2019                | Field derived strain                                                                   | RNA depletion using Ribo-Zero Gold rRNA Removal Kit (Illumina, USA) followed by library preparation using TruSeq 2 Library Preparation Kit | Pooled female adult mosquitoes.                                                                                                                                      | (9)  |
| Townsville, Queensland, Australia<br>GEO accession: GSE100917                                                                                                       | Wild Collected: March 2015<br>Sequenced: June/July 2015<br>Deposited in GEO: 2017-07-07                                             | Field derived strain                                                                   | <b>sRNA sequencing</b><br>Illumina TruSeq Small RNA                                                                                        | Pooled whole mosquitoes                                                                                                                                              | (10) |
| Kampong Cham, Cambodia<br>BioProject: PRJNA556544                                                                                                                   | Single lab colony female: 2013<br>Single wild-caught female: 2013<br>Cell culture homogenates: 2015<br>Deposited in SRA: 2019-07-25 | Mosquito homogenates passed on c6/36 cells, and single mosquitoes used for sequencing. | <b>ViralRNA</b><br>RNA extracted using QIAamp Viral RNA Mini Kit (Qiagen)<br>Library preparation using Nextera XT DNA Kit (Illumina)       | Cell culture isolated virus from a laboratory colony of <i>Aedes aegypti</i> after 3 passages.<br>Two individual mosquitoes: one wild-caught and one from the colony | (4)  |
| Phnom Penh, Cambodia<br>BioProject: PRJNA556544<br>SRA accession: SRR9830742                                                                                        | Cell culture homogenates: 2015<br>Deposited in SRA: 2019-07-25                                                                      | Mosquito homogenates passed on c6/36 cells                                             |                                                                                                                                            | Cell culture isolated virus from laboratory colony of <i>Aedes aegypti</i> after 2 passages.                                                                         |      |
| Fuzhou, Fujian province, China<br>BioProject accession: PRJNA476690                                                                                                 | Samples collected 2015,<br>Deposited in SRA: 2018-06-19                                                                             | Unknown origin                                                                         | Total-RNA                                                                                                                                  | Midgut                                                                                                                                                               | (11) |
| Bora-Bora, French Polynesia<br>BioProject accession: PRJEB15531                                                                                                     | ~Caught in 1990,<br>Deposited in SRA: 2016-12-29                                                                                    | Field derived strain                                                                   | TruSeq Stranded mRNA sample Prep kit                                                                                                       | Whole non-blood fed adult females                                                                                                                                    | (12) |
| Bora-Bora, French Polynesia<br>BioProject accession: PRJEB1859                                                                                                      | ~Caught in 1990<br>RNA-Seq produced ~2010<br>Deposited in SRA: 2013-09-02                                                           | Field derived strain                                                                   | Total-RNA                                                                                                                                  | Larval midguts                                                                                                                                                       | (13) |
| Bora-Bora, French Polynesia<br>BioProject accession: PRJEB1859                                                                                                      | ~Caught in 1990<br>RNA-Seq produced ~2013<br>Deposited in SRA: 2013-09-02                                                           | Field derived strain                                                                   | Total-RNA, polyA enriched                                                                                                                  | G11 larvae obtained from three independent egg batches Selected for insecticide resistance                                                                           | (14) |
| Bora-Bora, French Polynesia<br>BioProject accession: PRJEB32622                                                                                                     | ~Caught in 1990<br>Deposited in GEO: 2019-05-17                                                                                     | Field derived strain                                                                   | Total-RNA, polyA enriched                                                                                                                  | Whole larval pooled samples                                                                                                                                          | (15) |
| Toahotu, Tahiti, French Polynesia<br>BioProject accession: PRJNA382618                                                                                              | Collected 2014-2015<br>Sequencing: ~2016, 9 <sup>th</sup> -14 <sup>th</sup> generation<br>Deposited in SRA: 2017-04-12              | Field derived strain                                                                   | Total-RNA                                                                                                                                  | Pooled saliva samples                                                                                                                                                | (16) |
| New Delhi India<br>Sequencing available from Figshare<br>URL: <a href="https://figshare.com/s/ce9f231e8a4dde617722">https://figshare.com/s/ce9f231e8a4dde617722</a> | Unknown                                                                                                                             | Unknown                                                                                | Total-RNA                                                                                                                                  | Whole mosquitoes                                                                                                                                                     | (17) |
| Xayaboury, Luang Prabang, Vientiane Capital, Saravane, Attapeu Laos<br>BioProject accession: PRJEB37991                                                             | Collected: 2014<br>Fifth generation lab colony subjected to sequencing<br>Deposited in SRA: 2020-05-01                              | Field derived strain                                                                   | Oligo-dT selection of total-RNA NEBNext® Ultra™ II directional RNA library Prep Kit for Illumina (New England Biolabs)                     | Whole female 3-days old adult non-blood fed                                                                                                                          | (18) |
| Jinjang, Selangor, Malaysia<br>BioProject accession: PRJNA320356                                                                                                    | Field caught 1975<br>Deposited in SRA: 2016-05-19                                                                                   | Lab strain                                                                             | Total-RNA, Poly-A enriched                                                                                                                 | Germline                                                                                                                                                             | (19) |
| Bangkok, Thailand<br>BioProject accession: PRJNA413709                                                                                                              | Wild-caught: June 2015<br>Deposited in SRA: 2017-10-09                                                                              | Wild pools                                                                             | Total-RNA, Ribosomal-RNA depleted                                                                                                          | Whole mosquitoes                                                                                                                                                     | (5)  |
| Bangkok, Thailand<br>BioProject accession: PRJNA612326                                                                                                              | Wild-caught: 2009<br>Deposited in SRA: 2020-03-12                                                                                   | Lab strain                                                                             | PolyA enriched NEBNext Poly(A) mRNA Magnetic Isolation kit                                                                                 | Female spermathecae of blood fed and non-blood fed adults.                                                                                                           | (20) |

|                                                                                                          |                                                                                                                                                            |                                       |                                                                                                                               |                                                                                         |          |
|----------------------------------------------------------------------------------------------------------|------------------------------------------------------------------------------------------------------------------------------------------------------------|---------------------------------------|-------------------------------------------------------------------------------------------------------------------------------|-----------------------------------------------------------------------------------------|----------|
| Kamphaeng Phet, Thailand<br>BioProject accession: PRJNA310013                                            | Wild-caught in 2011, supplemented with mosquitoes every 2-3 years<br>Sequencing conducted in October 2013 and January 2014<br>Deposited in SRA: 2016-01-27 | Lab strain                            | Total-RNA                                                                                                                     | Female reproductive organs                                                              | (21)     |
| Kamphaeng Phet, Thailand<br>BioProject accession: PRJNA487089                                            | As above:<br>Sequencing conducted: June and August of 2017<br>Deposited in SRA: 2018-08-21                                                                 | Lab strain                            | Total-RNA                                                                                                                     | Male reproductive organs                                                                | (22)     |
| Kamphaeng Phet Province, Thailand<br>BioProject accession: PRJNA482553                                   | Deposited in SRA: 2018-07-12                                                                                                                               | Field derived strain (26 generations) | mRNA                                                                                                                          | Embryos, engorged female mosquitoes                                                     | (23)     |
| Phetchaburi, Thailand<br>BioProject accession: PRJEB15531                                                | Collected during 2014-2015<br>Sequenced: Using G2<br>Deposited in SRA: 2016-12-29                                                                          | Field derived strain                  | Total-RNA, polyA enriched                                                                                                     | Whole non-blood fed adult females                                                       | (12)     |
| Nakhonsawan, Thailand<br>BioProject accession: PRJEB15531                                                | Collected during 2014-2015<br>G2 used for sequencing<br>Deposited in SRA: 2016-12-29                                                                       | Field derived strain                  | Total-RNA, polyA enriched                                                                                                     | Whole non-blood fed adult females                                                       | (12)     |
| Nakhon Nayok Province, Thailand<br>BioProject accession: PRJNA276135                                     | Wild collected 2008<br>Deposited in SRA: 2015-02-23                                                                                                        | Wild pools                            | Total-RNA PolyA depleted, Ribosomal-RNA depleted                                                                              | Whole mosquitoes                                                                        | (24)     |
| Thep Na Korn (KPP), Thailand<br>BioProject accession: PRJNA386455                                        | Wild-caught in 2013<br>Sequencing conducted within ten generations<br>Deposited in SRA: 2017-05-12                                                         | Field derived strain                  | Total-RNA, polyA enriched                                                                                                     | Midguts                                                                                 | (25)     |
| Thep Na Korn (KPP), Thailand<br>BioProject accession: PRJNA540058                                        | Wild-caught in 2013<br>Collected: 2018<br>Deposited in SRA: 2019-04-27                                                                                     | Field derived strain                  | ViralRNA<br>RNA extracted using QIAamp Viral RNA Mini Kit (Qiagen)<br>Library preparation using Nextera XT DNA Kit (Illumina) | Mosquito homogenates passaged on c6/36 cells and single mosquitoes used for sequencing. | (26)     |
| Rayong (T32), Thailand<br>BioProject accession: PRJNA233429                                              | Wild-caught: January 2009<br>Sequenced: 2010-2011, G4<br>Deposited in SRA: 2014-01-04                                                                      | Field derived strain                  | mRNA, polyA enriched<br>Illumina TruSeq RNA Sample Prep Kit v. 2 and mRNA Sequencing Sample Prep Kit.                         | Antenna                                                                                 | (2)      |
| Ang Mo Kio, Singapore<br>Kindly made available to us via Milly Choy, October Sessions, and Ooi Eng Eong. | Established in 2010                                                                                                                                        | Field derived strain                  | mRNA                                                                                                                          | Total mosquitoes                                                                        | (27)     |
| Ang Mo Kio, Singapore<br>BioProject accession: PRJNA533031                                               | Colony established in 2010<br>Samples collected: 2016-12-31<br>Deposited in SRA: 2019-04-16                                                                | Lab strain                            | rRNA removal                                                                                                                  | Salivary glands from adult Female mosquitoes                                            | (28)     |
| <b>American Samples</b>                                                                                  |                                                                                                                                                            |                                       |                                                                                                                               |                                                                                         |          |
| Humaita, Tubiacanga and Belford Roxo, Rio de Janeiro, Brazil<br>BioProject accession: PRJNA277466        | Wild-caught 2013<br>Deposited in SRA: 2015-02-13                                                                                                           | Field derived strain                  | <b>Poly-A enriched and Ribosomal-RNA depleted</b><br>TruSeq Stranded Total RNA kit<br><b>sRNA sequencing</b>                  | Whole pools of mosquitoes                                                               | (29)     |
| Humaita, Tubiacanga and Belford Roxo, Rio de Janeiro, Brazil<br>BioProject accession: PRJNA401335        | Wild-caught 2013<br>F1 and F2 generations<br>Deposited in SRA: 2015-02-13                                                                                  | Field derived strain                  | <b>sRNA sequencing</b><br>TruSeq Small RNA Library Prep Kit                                                                   | Whole-body, Midgut and Carcass                                                          | (30)     |
| Nova Iguaçu, Rio de Janeiro, Brazil<br>BioProject accession: PRJNA327841                                 | Collected: Unknown<br>Deposited in SRA: 2016-07-05                                                                                                         | Field derived strain                  | <b>sRNA sequencing</b><br>TruSeq Small RNA Sample Prep Kit 7A (Illumina, USA)                                                 | Whole adult females                                                                     | (31)     |
| St-Georges & Cayenne, French Guiana<br>BioProject accession: PRJEB15531                                  | Collected during 2014-2015<br>G2 used for sequencing<br>Deposited in SRA: 2016-12-29                                                                       | Field derived strain                  | <b>mRNA -stranded</b><br>TruSeq Stranded mRNA sample Prep kit                                                                 | Whole non-blood fed adult females                                                       | (12)     |
| Les Abymes & Petit-Bourg, Guadeloupe<br>BioProject accession: PRJNA515586                                | Collected Les Abymes (2016, 2017), Petit-Bourg (2017)                                                                                                      | Wild-caught                           | Viral RNA and DNA enrichment using published NetoVIR protocol                                                                 | Multiple pools of adult male and female mosquitoes                                      | (32)     |
| Chetumal (CTM), Mexico<br>BioProject accession: PRJNA192626, PRJNA174376, PRJNA147583                    | CTM derived from the Yucatan Peninsula in Mexico, 2005, Sequenced at different times: during 2011-2012                                                     | Lab strain                            | <b>polyA enriched mRNA</b><br>cDNA prepared with random primers                                                               | Whole blood-fed and sugar-fed female mosquitoes                                         | (33-35)  |
| Chetumal (CTM), Mexico<br>BioProject accession: PRJNA533980                                              | Lab adapted CTM colony<br>Collection date: 2015<br>Deposited in SRA: 2019-04-21                                                                            | Lab strain                            | <b>sRNA sequencing</b><br>TruSeq Small RNA Sample Prep Kit (Illumina, San Diego CA)                                           | Midgut tissues                                                                          | (36)     |
| Chiapas, Mexico<br>BioProject accession: PRJNA505498                                                     | Wild-caught August 2016                                                                                                                                    | Wild-caught                           | <b>RNAse H/RT rRNA depletion</b>                                                                                              | Whole male and female mosquitoes                                                        | (37)     |
| Cuernavaca, Mexico<br>BioProject accession: PRJNA301038                                                  | Caught in Morelos 2004<br>Samples collected: Apr-2013<br>Deposited in SRA: 2015-11-03                                                                      | Lab strain                            | <b>Total-RNA, mRNA</b><br>TruSeq RNA Sample Preparation Kit                                                                   | Midgut tissue                                                                           | (38)     |
| Poza Rica, Mexico<br>BioProject accession: PRJNA645199                                                   | Collected in 2011<br>Black Lab at Colorado State University<br>Deposited in SRA: 2020-07-09                                                                | Lab strain                            | <b>Total-RNA random amplification</b><br>KAPA HyperPrep kit                                                                   | Total mosquitoes                                                                        | (39)     |
| Tapachula, Mexico<br>BioProject accession: PRJNA615972                                                   | Collected Jan-2016<br>F5 generation used for RNA-Seq                                                                                                       | Field derived strain                  | <b>PolyA mRNA enriched</b><br>KAPA Stranded mRNA-Seq Kit for Illumina.                                                        | Midgut of mosquitoes                                                                    | (40)     |
| Puerto Rico, (wild pools)*<br>BioProject accession: PRJNA307706                                          | Wild-caught June 2014                                                                                                                                      | Wild-caught                           | TruSeq Stranded Total RNA                                                                                                     | Whole mosquitoes                                                                        | (41)     |
| Curepe, Trinidad<br>BioProject accession: PRJNA476553                                                    | Wild-caught November 2015<br>Deposited in SRA: 2018-06-18                                                                                                  | Field derived strain                  | Total-RNA, Poly-A enriched                                                                                                    | Whole female mosquitoes                                                                 | (42)     |
| Curepe, Trinidad<br>BioProject accession: PRJNA396016                                                    | Wild-caught November 2015<br>Deposited in SRA: Jul 27, 2017                                                                                                | Field derived strain                  | <b>sRNA sequencing</b><br>Epicentre ScriptMiner kit (Cat. No. SMMP101212)                                                     | Second, third, fourth instar larvae and adults                                          | (3)      |
| Galveston, Texas, USA<br>BioProject accession: PRJNA382162, PRJNA399504                                  | Wild-caught in Summer, 2003<br>Deposited in SRA: 2017-04-07                                                                                                | Lab strain                            | Total-RNA, PolyA enriched; sRNA                                                                                               | Whole mosquitoes                                                                        | (43, 44) |
| Rexville D (REX-D) Red-eye strain, Puerto Rico<br>BioProject accession: PRJNA401335                      | Wild-caught: 2013<br>Deposited in SRA: 2017-09-04                                                                                                          | Lab strain                            | <b>sRNA sequencing</b><br>TruSeq Small RNA Library Prep Kit                                                                   | Whole-body, Midgut and Carcass                                                          | (30)     |
| Miami, USA (Lab adapted)<br>BioProject accession: PRJNA386859                                            | Wild-caught 2016<br>Sequenced: 2017<br>Deposited in SRA: 2017-10-16                                                                                        | Field derived strain                  | Total-RNA, Ribosomal-RNA depleted, Strand-specific RNA-Seq & sRNA                                                             | Soma and germline tissues                                                               | (45)     |
| Miami, USA<br>BioProject accession: PRJNA344504                                                          | Caught between August-Oct 2016<br>Deposited in SRA: 2017-05-17                                                                                             | Wild pools                            | Total-RNA, Ribosomal-RNA depleted,                                                                                            | Whole mosquitoes                                                                        | (46)     |

|                                                                                                                              |                                                                                                                      |                                           |                                                                                                                           |                                                                                                      |          |
|------------------------------------------------------------------------------------------------------------------------------|----------------------------------------------------------------------------------------------------------------------|-------------------------------------------|---------------------------------------------------------------------------------------------------------------------------|------------------------------------------------------------------------------------------------------|----------|
| Orlando, Florida, USA<br>BioProject accession: PRJEB15531                                                                    | Collected in Orlando, Florida/~1940s, Deposited in SRA: 2016-12-29                                                   | Lab strain                                | TruSeq Stranded mRNA sample Prep kit                                                                                      | Whole non-blood fed adult females                                                                    | (12)     |
| Orlando, Florida, USA<br>BioProject accession: PRJNA487057                                                                   | Collected in Orlando, Florida/~1940s Deposited in SRA: Aug 21, 2018                                                  | Lab strain                                | Total RNA, mRNA enriched TruSeq DNA Library Preparation Kit                                                               | Whole adult female mosquitoes                                                                        | (47)     |
| Orlando, Florida, USA<br>BioProject accession: PRJNA148539                                                                   | Collected in Orlando, Florida/~1940s, Submitted to GEO: Jul 26, 2011                                                 | Lab strain & transgenic transformed lines | sRNA sequencing                                                                                                           | Whole adult mosquitoes                                                                               | (48)     |
| Key West, Florida, USA<br>BioProject accession: PRJNA487057                                                                  | Wild-caught in Key West (24.55° N, 81.78° W), and reared in the laboratory since 2011 Deposited in SRA: Aug 21, 2018 | Lab strain                                | Total RNA, mRNA enriched TruSeq DNA Library Preparation Kit                                                               | Whole adult female mosquitoes                                                                        | (47)     |
| Manatee County, USA<br>BioProject accession: PRJNA547758                                                                     | Wild-caught 2016-2017 (May 15, 2016, and 33 June 19, 2017) four Manatee County sites                                 | Wild-caught mosquitoes                    | Inverse-rRNA sequencing                                                                                                   | Pooled abdomens from 20 adult females                                                                | (49)     |
| <b>Unknown or Ambiguous</b>                                                                                                  |                                                                                                                      |                                           |                                                                                                                           |                                                                                                      |          |
| Rexville D (REX-D) Red-eye strain, Puerto Rico<br>BioProject accession: PRJNA192626                                          | Deposited in SRA: 2013-03-07                                                                                         | Field derived strain                      | <b>mRNA sequencing</b>                                                                                                    | RNA was extracted from pools of 3 female mosquitoes using the standard Trizol (Invitrogen) protocol. |          |
| Rexville D (RexD), Puerto Rico<br>BioProject accession: PRJNA192626                                                          | Wild-caught 1988-1989 Sequencing: 2011 Deposited in SRA: 2013-03-07                                                  | Lab strain                                | <b>mRNA polyA enriched</b> oligo-d(T)25 magnetic beads (Dynabeads: Invitrogen, CA, USA) cDNA prepared with random primers | Whole blood-fed and sugar-fed female mosquitoes                                                      | (35)     |
| Rexville D (RexD), Puerto Rico<br>BioProject accession: PRJNA396016                                                          | Wild-caught 1988-1989 Deposited in SRA: Jul 27, 2017                                                                 | Lab strain                                | <b>sRNA sequencing</b> Epicentre ScriptMiner kit (Cat. No. SMMP101212)                                                    | Second, third, fourth instar larvae and adults                                                       | (3)      |
| Rexville D (RexD) Puerto Rico<br>BioProject accession: PRJNA206074                                                           | Wild-caught 1988-1989 Deposited in SRA: 2013-05-31                                                                   | Lab strain                                | <b>sRNA sequencing</b> FLASHPAGE system Library prep/ Small RNA Expression kit (Applied Biosystem)                        | Whole mosquitoes                                                                                     | (50, 51) |
| Higgs White Eye (HWE) strain (Variant of Rex-D), Puerto Rico<br>GEO accession: GSE95378<br>BioProject accession: PRJNA376828 | Wild-caught 1988-1989 Deposited in GEO: Feb 26, 2017                                                                 | Lab strain                                | Total-RNA, Poly-A enriched                                                                                                | Adult midgut tissue                                                                                  | (52)     |
| Higgs White Eye (HWE) strain (Variant of Rex-D), Puerto Rico<br>BioProject accession: PRJNA475410                            | Deposited in SRA: 2018-06-10                                                                                         | Lab strain, transgenic lab strain         | <b>sRNA sequencing</b>                                                                                                    | Wild type, transgenic non-blood fed and blood-fed midguts                                            | (53)     |
| Rockefeller strain (ROCK)<br>BioProject accession: PRJNA396016                                                               | Caribbean origin caught ~1930, Deposited in SRA: 2017-07-27                                                          | Lab strain                                | <b>sRNA sequencing</b> Epicentre ScriptMiner kit (Cat. No. SMMP101212)                                                    | Second, third, fourth instar larvae and adults                                                       | (3)      |
| Rockefeller strain<br>BioProject accession: PRJNA525617                                                                      | Colony location: Wageningen, Netherlands Collected: May-2019                                                         | Lab strain                                | sRNA                                                                                                                      | Whole mosquito body, without legs and wings                                                          | (54)     |
| Rockefeller strain (ROCK)<br>BioProject accession: PRJNA388655                                                               | Caribbean origin caught ~1930, Deposited in SRA: 2017-05-31                                                          | Lab strain                                | sRNA                                                                                                                      | Corpora allata-corpora etagen complexes                                                              | (55)     |
| Rockefeller strain (ROCK)<br>BioProject accession: PRJNA311123                                                               | Caribbean origin caught ~1930, Deposited in SRA: 2016-12-08                                                          | Lab strain                                | Total-RNA                                                                                                                 | Saliva                                                                                               | (56)     |
| Rockefeller strain, (ROCK)<br>BioProject accession: PRJNA379149                                                              | Caribbean origin caught ~1930, Data deposited to GEO: March 14, 2017                                                 | Lab strain                                | Total-RNA                                                                                                                 | Adult female midguts                                                                                 | (57)     |
| Rockefeller strain (ROCK) (available as MRA-734)<br>BioProject accession: PRJNA54037                                         | Caribbean origin caught ~1930, Sequencing conducted in October 2009 Deposited in SRA: 2010-10-15                     | Lab strain                                | Poly-A                                                                                                                    | Five female fat bodies pre and post blood meal                                                       | (58)     |
| Rockefeller strain (ROCK)<br>BioProject accession: PRJNA246607                                                               | Caribbean origin caught ~1930, Deposited in SRA: 2016-06-23                                                          | Lab strain                                | Total-RNA                                                                                                                 | Adult and larval malpighian tubules                                                                  | (59)     |
| Rockefeller (ROCK) (Publication) Liverpool (Metadata)<br>BioProject accession: PRJNA314871                                   | Deposited in SRA: 2016-03-10                                                                                         | Lab strain                                | Unknown                                                                                                                   | Adult female midguts                                                                                 | (60)     |
| Rockefeller (ROCK)<br>BioProject accession: PRJNA507369                                                                      | Caribbean origin caught ~1930, Samples collected: 2017-06 Deposited in SRA: 2018-11-29                               | Lab strain                                | Poly-A                                                                                                                    | Male and female antennae                                                                             | (61)     |
| Rockefeller<br>BioProject accession: PRJNA551490                                                                             | Deposited in SRA: 2019-06-27                                                                                         | Lab strain                                | Poly-A enriched stranded mRNA library                                                                                     | Head and thorax of adult female mosquitoes                                                           | (62)     |
| UGAL mGFP (transgenic strain)<br>BioProject accession: PRJNA79693                                                            | Deposited in SRA: 2010-07-02                                                                                         | Transgenic mosquito                       | Poly-A enriched                                                                                                           | Male and female first instar larvae                                                                  | (63)     |
| UGAL/Rockefeller<br>BioProject accession: PRJNA360643                                                                        | Caribbean origin caught ~1930, Deposited in SRA: 2017-01-09                                                          | Lab strain                                | CLIP-Seq bound to AGO-1, sRNA                                                                                             | Fat body                                                                                             | (64)     |
| UGAL/Rockefeller<br>BioProject accession: PRJNA340082                                                                        | Caribbean origin caught ~1930, Collection date: May-2015 Deposited in SRA: 2016-08-25                                | Lab strain                                | Total-RNA                                                                                                                 | Larvae                                                                                               | (65)     |
| UGAL, New Mexico State University<br>BioProject accession: PRJNA246243                                                       | Caribbean origin caught ~1930, Deposited in SRA: 2014-05-05                                                          | Lab strain                                | Total-RNA, mRNA seq                                                                                                       | Female fat body tissue                                                                               | (66)     |
| UGA<br>BioProject accession: PRJNA421500                                                                                     | Caribbean origin caught ~1930, Sample collection date: Jun-2017 Deposited in SRA: 2017-12-07                         | Lab strain                                | Total-RNA, mRNA seq                                                                                                       | Cultures containing first instars, gnotobiotic first instars                                         | (67)     |
| Liverpool, kh <sup>w</sup> (white eye)<br>BioProject accession: PRJNA214946                                                  | Deposited in GEO: 2013-08-12                                                                                         | Lab strain                                | sRNA                                                                                                                      | Head and whole mosquito samples                                                                      | (68)     |
| Liverpool strain<br>BioProject accession: PRJNA147359                                                                        | Deposited in GEO: Sep 20, 2011                                                                                       | Lab strain                                | sRNA                                                                                                                      | Whole female mosquitoes                                                                              | (69)     |
| Liverpool strain<br>BioProject accession: PRJEB15531                                                                         | Collected during 2014-2015 Deposited in SRA: 2016-12-29                                                              | Field derived strain                      | <b>mRNA -stranded</b> TruSeq Stranded mRNA sample Prep kit                                                                | Whole non-blood fed adult females                                                                    | (12)     |
| Liverpool strain<br>GEO Accession: GSE35161<br>BioProject accession: PRJNA150789                                             | Deposited in GEO: Jan 17, 2012                                                                                       | Lab strain                                | sRNA                                                                                                                      | Whole female mosquitoes                                                                              | (70)     |
| Liverpool strain<br>BioProject accession: PRJNA232374                                                                        | Deposited in SA: 2013-12-20                                                                                          | Lab strain                                | sRNA                                                                                                                      | Various developmental stages                                                                         | (71)     |
| Liverpool strain (Tu strain)<br>GEO Accession: GSE34480<br>BioProject accession: PRJNA151475                                 | Deposited in GEO: Dec 15, 2011                                                                                       | Lab strain                                | mRNA                                                                                                                      | Various tissues                                                                                      | (72)     |

|                                                                                                                            |                                                                                     |                  |                                                                 |                                                                                                                           |      |
|----------------------------------------------------------------------------------------------------------------------------|-------------------------------------------------------------------------------------|------------------|-----------------------------------------------------------------|---------------------------------------------------------------------------------------------------------------------------|------|
| Liverpool strain<br>BioProject accession: PRJNA319716                                                                      | Deposited in SRA: 2016-04-26                                                        | Lab strain       | sRNA                                                            | Whole bodies                                                                                                              | (73) |
| Liverpool strain<br>Colorado State University<br>BioProject accession: PRJNA261799                                         | October 2009<br>Deposited in SRA: 2014-09-23                                        | Lab strain       | mRNA                                                            | Whole female and male mosquitoes                                                                                          | (74) |
| Liverpool strain<br>BioProject accession: PRJNA356717                                                                      | Deposited in SRA: 2016-12-08                                                        | Lab strain       | Total-RNA                                                       | Whole mosquitoes                                                                                                          | (75) |
| Liverpool strain<br>BioProject accession: PRJNA298592                                                                      | Deposited in SRA: 2015-10-13                                                        | Lab strain       | Total-RNA, mRNA                                                 | Midguts                                                                                                                   | (76) |
| Liverpool strain<br>BioProject accession: PRJNA445828                                                                      | Deposited in SRA: 2018-03-27                                                        | Lab strain       | mRNA, Total-RNA                                                 | Fat body culture                                                                                                          | (77) |
| Liverpool strain<br>BioProject accession: PRJNA192626                                                                      | Sequencing: 2011<br>Deposited in SRA: 2013-03-07                                    | Lab strain       | cDNA prepared with random primers                               | Whole blood-fed and sugar-fed female mosquitoes                                                                           | (35) |
| Liverpool strain<br>Pasteur Institute (Paris, France)<br>BioProject accession: PRJEB23850                                  | Deposited in SRA: 2018-05-03                                                        | Lab strain       | TruSeq Stranded mRNA sample Prep kit                            | Larval and adult stages                                                                                                   | (78) |
| Liverpool strain<br>BioProject accession: PRJNA132131                                                                      | Deposited in SRA: Oct 21, 2010                                                      | Lab strain       | Total-RNA                                                       | Male and female salivary glands                                                                                           | (79) |
| Liverpool strain<br>GEO accession: GSE24872<br>BioProject accession: PRJNA132131                                           | Deposited in GEO: 2010-10-21                                                        | Lab strain       | Total-RNA                                                       | Whole female mosquitoes kept on sugar-fed diet versus whole mosquitoes blood-fed                                          | (80) |
| Liverpool (Black-eyed strain)<br>GEO Accession: GSE53664<br>BioProject accession: PRJNA232599                              | Deposited in SRA: 2013-12-26                                                        | Lab strain       | Total-RNA                                                       | Filarial worm infected thorax of female adult mosquitoes                                                                  | (81) |
| Liverpool strain<br>BioProject accession: PRJNA255467                                                                      | Deposited in SRA: 2014-07-30                                                        | Lab strain       | Total-RNA                                                       | Female whole mosquitoes                                                                                                   | (82) |
| Liverpool strain LVP_ib12<br>BioProject accession: PRJNA209388, PRJNA419241                                                | MR4 BEI 735<br>Deposited in SRA: 2013-06-27                                         | Lab strain       | Total-RNA                                                       | Various developmental stages                                                                                              | (83) |
| Liverpool strain (LVPIB12)<br>BioProject accession: PRJNA236239                                                            | BEI Resources/CDC/MR-4<br>Collection date: Jan-2013<br>Deposited in SRA: 2014-02-05 | Lab strain       | Total-RNA                                                       | Major peripheral male and female sensory tissues, the brain and (female) ovary.                                           | (84) |
| Liverpool (Black-eyed strain)<br>BioProject accession: PRJNA503353, PRJNA294263, PRJNA294264, PRJNA294265 and PRJNA294281. | Before 2018<br>Deposited in SRA: 2018-11-01                                         | Lab strain       | Total-RNA, Ribosomal-RNA cleared                                | Whole adult body                                                                                                          | (85) |
| Liverpool strain (LVP-IB12)<br>BioProject accession: SRP001531                                                             | Deposited in SRA: 2009-12-15                                                        | Lab strain       | Poly-A enriched                                                 | Eggs and non-blood fed male and female adults                                                                             | (86) |
| Liverpool strain (Strain LVP-IB12, Eggs, MRA-735)<br>BioProject accession: PRJNA595990                                     | Deposited in SRA: 2019-12-16                                                        | Lab strain       | <b>mRNA sequencing</b><br>TruSeq Stranded mRNA Library Prep Kit | Malpighian tubules were isolated at day 1, day 2, and day 3 following infection by D. immitis and from sugar-fed controls | (87) |
| Liverpool (Black-eyed strain)<br>NR-48921<br>BioProject accession: PRJNA595990                                             | Deposited in SRA: 2019-12-16                                                        | Lab strain       | <b>mRNA sequencing</b><br>TruSeq Stranded mRNA Library Prep Kit | Malpighian tubules were isolated at day 1, day 2, and day 3 following infection by D. immitis and from sugar-fed controls | (87) |
| Liverpool, kh* (white eye)<br>BioProject accession: PRJNA261751                                                            | Deposited in SRA: 2014-09-22                                                        | Reference strain | <b>mRNA sequencing</b>                                          | Adult carcass of whole male and female mosquitoes                                                                         | (88) |
| Bayer laboratory colony (Likely Liverpool Strain)<br>BioProject accession: PRJNA383480                                     | Unknown<br>Before 2017<br>Deposited in SRA: 2017-04-19                              | Lab strain       | sRNA                                                            | Whole female body                                                                                                         | (89) |

\* Described as wild pools of unidentified mosquitoes, we verified that *Ae. aegypti* were in these mixed samples using COX1 BLASTn similarity.

Table S2. All *Ae. albopictus* samples analysed in this study and associated publications

| Colony designation, City and country of original catch                                         | Date of original catch/ Date and generation (g) of sequencing                                                          | Wild-caught/ Field derived strain/ Reference strain | Total-RNA or sRNA sequencing | Tissues sequenced                                                 | REF      |
|------------------------------------------------------------------------------------------------|------------------------------------------------------------------------------------------------------------------------|-----------------------------------------------------|------------------------------|-------------------------------------------------------------------|----------|
| <b>American samples</b>                                                                        |                                                                                                                        |                                                     |                              |                                                                   |          |
| Chiapas, Mexico<br>BioProject accession: PRJNA505498                                           | Wild-caught August 2016                                                                                                | Wild-caught                                         | RNAse H/RT rRNA depletion    | Female and Male whole                                             | (37)     |
| Gainesville (MRA-804), USA<br>BioProject accession: PRJNA327857                                | Unknown sequencing<br>Deposited in SRA: 2016-07-05                                                                     | Field derived strain                                | Total-RNA                    | Female midgut and Carcass                                         | (90)     |
| Gainesville (MRA-804), USA<br>BioProject accession: PRJNA232489, PRJNA279095                   | RNA-Sequencing: September 2012<br>Deposited in SRA: 2015-03-22                                                         | Field derived strain                                | Total-RNA                    | Malpighian tubules                                                | (91, 92) |
| Manassas, USA<br>BioProject accession: PRJNA268379                                             | Manassas, VA, in 2008:<br>Sequencing conducted on F3 laboratory generation 03-Mar-2013<br>Deposited in SRA: 2014-11-25 | Field derived strain                                | Total RNA                    | Whole adult mosquitoes                                            | (93)     |
| Manassas, USA<br>BioProject accession: PRJNA71721                                              | Manassas, VA, in 2008<br>Sequencing conducted on F6 generation June 2010<br>Deposited in SRA: 2011-11-01               | Field derived strain                                | Total RNA                    | 400 female oocysts                                                | (94)     |
| Manassas, USA<br>BioProject accession: PRJNA158021                                             | Manassas, VA, in 2008<br>F9 generation 2010<br>Deposited in SRA: 2012-04-06                                            | Field derived strain                                | mRNA                         | Embryos under different conditions                                | (95)     |
| Manassas, USA<br>BioProject accession: PRJNA187045                                             | Manassas, VA, in 2008<br>Deposited in SRA: 2012-12-31                                                                  | Field derived strain                                | mRNA                         | Pharate larvae, collected at 11, 21- and 40-days post-oviposition | (96)     |
| Manassas, USA<br>BioProject accession: PRJNA360961                                             | Manassas, VA, in 2008<br>F7 and F12 generation (2010)<br>Deposited in SRA: 2017-01-11                                  | Field derived strain                                | sRNA                         | Pharate Larvae                                                    | (97)     |
| Manassas, USA<br>BioProject accession: PRJNA694122<br>SRA accessions: SRR13521590, SRR13521539 | Manassas, VA, in 2008<br>Deposited in SRA: 2021-01-22                                                                  | Field derived strain                                | Total-RNA                    | Adult males used for sequencing M07 and M06                       | (98)     |
| New Jersey, USA<br>BioProject accession: PRJNA223166                                           | Unknown origin<br>Deposited in SRA: 2013-10-18                                                                         | Field derived strain                                | Total RNA                    | Female and male reproductive organs                               | (99)     |

|                                                                                                                        |                                                                                                                                                  |                                             |                                             |                                                                                                                                                                                                                                              |            |
|------------------------------------------------------------------------------------------------------------------------|--------------------------------------------------------------------------------------------------------------------------------------------------|---------------------------------------------|---------------------------------------------|----------------------------------------------------------------------------------------------------------------------------------------------------------------------------------------------------------------------------------------------|------------|
| San Gabriel Valley, CA, USA<br>BioProject accession: PRJNA563095                                                       | F <sub>10</sub> generation used for RNA-Seq experiments<br>Deposited in SRA: 2019-10-16                                                          | Field derived strain                        | mRNA, poly-A enriched                       | All developmental stages from male and female                                                                                                                                                                                                | (100)      |
| San Gabriel Valley, CA, USA<br>BioProject accession: PRJNA610833                                                       | Described as (100)<br>Unknown generation used for sequencing<br>Deposited in SRA: 2020-03-06                                                     | Field derived strain                        | sRNA sequencing                             | Multiple developmental stages used.                                                                                                                                                                                                          | (101)      |
| Wise County, Virginia, USA<br>BioProject accession: PRJNA147359                                                        | Wise County, VA, in 2006<br>Deposited in GEO: Sep 20, 2011                                                                                       | Field derived strain                        | sRNA                                        | Whole female mosquitoes and head and thorax.                                                                                                                                                                                                 | (69)       |
| Wise County, Virginia, United States of America<br>BioProject accession: PRJNA214946                                   | Wise County, VA, in 2006<br>Deposited in SRA: April 2013                                                                                         | Laboratory strain                           | sRNA                                        | Pools of 5 females                                                                                                                                                                                                                           | (68)       |
| <b>Australian/ Asian Samples</b>                                                                                       |                                                                                                                                                  |                                             |                                             |                                                                                                                                                                                                                                              |            |
| Torres Strait Islands, Australia<br>BioProject accession: PRJNA450281                                                  | Unknown wild collection date.<br>Midgut samples collected in 2017<br>Deposited in SRA: 2018-04-15                                                | Field derived strain                        | Total-RNA                                   | Head and thorax & midgut of female adults                                                                                                                                                                                                    | (102, 103) |
| Foshan strain, Guangdong, China<br>Housed at the University of Pavia<br>BioProject accession: PRJNA607026              | Foshan strain, Guangdong, China and has been established in the laboratory since 1981<br>Collection date: 2017-07<br>Submission date: 2020-08-25 | Foshan Reference strain                     | sRNA                                        | Adult female carcasses and ovary pools                                                                                                                                                                                                       | (104, 105) |
| Foshan strain, Guangdong, China<br>BioProject accession: PRJNA577831                                                   | Foshan, Guangdong, China and has been established in the laboratory since 1981<br>Deposited in SRA: 2019-10-16                                   | Foshan Reference strain                     | mRNA enrichment<br>Oligo (dT) beads         | 30 female adults per sample                                                                                                                                                                                                                  | (106)      |
| Foshan strain, Guangdong, China<br>BioProject accession: PRJNA178303                                                   | CDC Guangdong, China strain<br>Wild-caught in 1981,<br>Sequencing data deposited in SRA: 2012-10-26                                              | Foshan Reference strain                     | sRNA                                        | Multiple tissues and samples; Embryo, Larvae, Pupae, Adult male, Sugar-fed Adult female, Blood-fed adult female                                                                                                                              | (107)      |
| Foshan strain, Guangdong, China<br>BioProject accession: PRJNA275727                                                   | CDC Guangdong, China strain<br>Wild-caught in 1981,<br>Deposited in SRA: 2015-02-21                                                              | Foshan Reference strain                     | Total-RNA                                   | Multiple developmental stages: L1-L2 larvae, embryo and male transcriptome                                                                                                                                                                   | (88)       |
| Foshan strain, Guangdong, China<br>BioProject accession: PRJNA266286                                                   | established the laboratory in 1981<br>Deposited in SRA: 2014-11-04                                                                               | Foshan Reference strain                     | Total-RNA, sRNA                             | Midgut sample data                                                                                                                                                                                                                           | (108)      |
| Foshan strain, Guangdong, China<br>BioProject accession: PRJNA236401                                                   | CDC Guangdong, China strain<br>Wild-caught in 1981,<br>Deposited in SRA 2014-01-25                                                               | Foshan Reference strain                     | sRNA                                        | Pooled midguts and whole mosquitoes                                                                                                                                                                                                          | (109, 110) |
| Foshan strain, Guangdong, China<br>BioProject accession: PRJNA270274                                                   | CDC Guangdong, China strain<br>Wild-caught in 1981,<br>Deposited in SRA: 2015-03-06                                                              | Foshan Reference strain                     | Total-RNA                                   | Multiple developmental stages: L1-L2 larvae, embryo and male and egg transcriptome                                                                                                                                                           | (111)      |
| Foshan strain, Guangdong, China<br>BioProject accession: PRJNA495114                                                   | CDC Guangdong, China strain<br>Wild-caught in 1981,<br>Collection date: 15/03/2018                                                               | Foshan Reference strain                     | Total-RNA                                   | Whole-body adult male and female mosquitoes                                                                                                                                                                                                  | (112)      |
| Longgang District, Shenzhen, China<br>BioProject accession: PRJNA475859                                                | Sample collection September 2014,<br>Deposited in SRA: 2018-06-21                                                                                | Field derived strain                        | Total-RNA                                   | Individual mosquitoes                                                                                                                                                                                                                        | (113)      |
| Yunnan, China<br>BioProject Accession: PRJNA472635<br>SRA accession: SRR7204305                                        | August and September 2016<br>Deposited in SRA: 2018-05-22                                                                                        | Wild-caught (pools) individually identified | Ribosomal depleted Total-RNA                | Whole mosquitoes, "mosquito_viroem_3" library annotated as <i>Anopheles sinensis</i> but BLASTn and SRA taxonomy analysis revealed majority <i>Ae. albopictus</i>                                                                            | (114)      |
| Yunnan, China<br>BioProject Accession: PRJNA474574<br>SRA accession: SRR7286979                                        | September and October 2017<br>Deposited in SRA: 2018-06-05                                                                                       | Wild-caught (pools) individually identified | Ribosomal depleted Total-RNA                | Whole mosquitoes                                                                                                                                                                                                                             | (115)      |
| Zhejiang, China<br>BioProject accession: PRJNA271540<br>SRA accession: SRR1745767                                      | Collected 2013<br>Deposited in SRA: 2015-01-04                                                                                                   | Wild-caught (pools)                         | Ribosomal depleted Total-RNA                | Whole mosquitoes: Pool of 26 mosquitoes containing: <i>Aedes albopictus</i> , <i>Armigeres subalbatus</i> , <i>Anopheles paraliae</i> , <i>Anopheles sinensis</i> , <i>Culex pipiens</i> , <i>Culex sp.</i> , <i>Culex tritaeniorhynchus</i> | (116)      |
| Kawasaki, Kanagawa Prefecture Japan<br>BioProject accession: PRJNA587399<br>SRA accession: SRR11213089,<br>SRR11213090 | Wild collected in 2008<br>45–50 generations of laboratory colonization used<br>Collected: 2015-01<br>Deposited in SRA: 2020-02-29                | Field derived strain                        | sRNA                                        | Three pools of 20 ovaries, testes or carcasses from the ISV-infected mosquitoes were combined for the generation of small RNA libraries.                                                                                                     | (117)      |
| Kuala Lumpur, Malaysia<br>BioProject accession: PRJNA694122                                                            | F <sub>0</sub> TROP males<br>Deposited in SRA: 2021-01-22                                                                                        | Field derived strain                        | Total-RNA                                   | Pooled male (n=9) adult mosquitos                                                                                                                                                                                                            | (98)       |
| Phu Hoa, Ben Cat District,<br>Binh Duong Province Vietnam<br>BioProject accession: PRJNA293817                         | Collected in 2011<br>Sequencing conducted within 12 generations<br>Deposited in SRA: 2015-08-25                                                  | Field derived strain                        | sRNA                                        | Pools of five whole mosquitoes                                                                                                                                                                                                               | (118)      |
| Phu Hoa, Ben Cat District,<br>Binh Duong Province Vietnam<br>BioProject accession: PRJNA587399                         | Collected: 2011-01-01<br>Experiments were performed within 16–20 generations<br>Deposited in SRA: 2019-11-04                                     | Field derived strain                        | sRNA                                        | Three pools of 20 ovaries, testes or carcasses from the ISV-infected mosquitoes were combined for the generation of small RNA libraries.                                                                                                     | (117)      |
| <b>European</b>                                                                                                        |                                                                                                                                                  |                                             |                                             |                                                                                                                                                                                                                                              |            |
| Nice, France<br>BioProject accession: PRJNA449278                                                                      | Mosquitoes collected in August 2011. F <sub>3</sub> , F <sub>11</sub> used for mosquito infections<br>Deposited in SRA: 2018-04-09               | Field derived strain                        | Total RNA<br>Nextera XT library preparation | Oral DENV infection followed by viral amplifications of collected saliva on C6/36 cells                                                                                                                                                      | (119)      |
| Athens, Greece<br>BioProject accession: PRJNA282718                                                                    | collected in Athens (Greece) in 2010;<br>Deposited in SRA: 2015-04-30                                                                            | Field derived strain                        | Poly-A                                      | Five to ten larvae in the late third to the early fourth stage were used for RNA extraction                                                                                                                                                  | (120)      |
| Rome, Italy<br>BioProject accession: PRJNA314492                                                                       | Caught in 2012,<br>Collection date: Oct-2012<br>Deposited in SRA: 2016-03-07                                                                     | Field derived strain                        | Total RNA                                   | Female antennae, Female palps, Female bodies, Male heads                                                                                                                                                                                     | (121)      |
| Rimini, Italy<br>BioProject accession: PRJNA493544                                                                     | Established in 2004<br>Collection date for RNA-Seq: 16-Nov-2017<br>Deposited in SRA: 2018-09-27                                                  | Field derived strain                        | Poly-A                                      | RNA was extracted from both the heads and the fat bodies of the pooled mosquitoes                                                                                                                                                            | (122)      |
| Ticino, Muzzano Switzerland<br>BioProject accession: PRJNA638077                                                       | Collected: August and September 2019<br>Deposited in SRA: 2020-06-08                                                                             | Wild-caught                                 | Total RNA                                   | Pool of 40 mosquitoes                                                                                                                                                                                                                        | (123)      |

Table S3. Incidence of ISVs in *Aedes aegypti* colonies and wild-caught samples

| Colony designation, City and country of original catch and Accession number                                                                            | AeAV | FoV | PCLV | GMQLV-1 | CFAV | HTV | LTLV | RaV | AeBNV-1 | ReV | APLV-1 | VeV | ATLV-1 | ATV | CYV | AOLV-1 | TMTLV | REF      |
|--------------------------------------------------------------------------------------------------------------------------------------------------------|------|-----|------|---------|------|-----|------|-----|---------|-----|--------|-----|--------|-----|-----|--------|-------|----------|
| <b>African</b>                                                                                                                                         |      |     |      |         |      |     |      |     |         |     |        |     |        |     |     |        |       |          |
| Bakoumba, Gabon<br>BioProject accession: PRJNA386453                                                                                                   | +    | -   | -    | -       | -    | -   | -    | -   | -       | -   | -      | -   | +      | -   | -   | -      | -     | (1)      |
| Rabai, Kenya (K2)<br>BioProject accession: PRJNA233429                                                                                                 | +    | -   | +    | -       | -    | +   | -    | +   | -       | -   | +      | -   | -      | +   | -   | -      | -     | (2)      |
| Rabai, Kenya (K4)<br>BioProject accession: PRJNA233429                                                                                                 | -    | -   | +    | -       | -    | +   | -    | +   | -       | -   | +      | -   | -      | +   | -   | -      | -     | (2)      |
| Rabai, Kenya (K14)<br>BioProject accession: PRJNA233429                                                                                                | +    | -   | +    | -       | -    | +   | -    | -   | -       | -   | +      | -   | -      | -   | -   | -      | -     | (2)      |
| Rabai, Kenya (K18)<br>BioProject accession: PRJNA233429                                                                                                | -    | -   | -    | -       | -    | -   | -    | -   | -       | -   | -      | -   | -      | -   | -   | -      | -     | (2)      |
| Rabai, Kenya (K19)<br>BioProject accession: PRJNA233429                                                                                                | -    | -   | +    | -       | -    | -   | -    | -   | -       | -   | -      | +   | -      | +   | -   | -      | -     | (2)      |
| Rabai, Kenya (K27)<br>BioProject accession: PRJNA233429                                                                                                | -    | -   | -    | -       | -    | -   | -    | -   | -       | -   | -      | -   | -      | -   | -   | -      | -     | (2)      |
| Rabai, Kenya K27 x K14 cross colonies (GP, GP2, HP1, HP2)<br>BioProject accession: PRJNA233429                                                         | +    | -   | +    | -       | -    | +   | -    | -   | -       | -   | +      | -   | -      | -   | -   | -      | -     | (2)      |
| Shauri Moyo (Moyo-S/R), Mombasa, Kenya<br>BioProject accession: PRJNA396016                                                                            | -    | -   | -    | -       | -    | -   | -    | -   | -       | -   | -      | -   | -      | -   | -   | -      | -     | (3)      |
| Bundibugyo (U30), Uganda<br>BioProject accession: PRJNA233429                                                                                          | -    | +   | +    | -       | -    | -   | -    | -   | -       | -   | -      | -   | -      | +   | -   | -      | -     | (2)      |
| Wakiso, Uganda<br>BioProject accession: PRJNA556544                                                                                                    | -    | -   | -    | -       | +    | -   | -    | -   | -       | -   | -      | -   | -      | -   | -   | -      | -     | (4)      |
| <b>Australian/ Asian Samples</b>                                                                                                                       |      |     |      |         |      |     |      |     |         |     |        |     |        |     |     |        |       |          |
| Cairns, Queensland, Australia<br>BioProject accession: PRJNA413709                                                                                     | -    | -   | +    | +       | +    | +   | -    | -   | -       | -   | +      | -   | +      | +   | -   | +      | -     | (5)      |
| Cairns, Queensland, Australia<br>Available on FigShare:<br><a href="https://doi.org/10.26180/5bb0d5ae69035">https://doi.org/10.26180/5bb0d5ae69035</a> | -    | -   | +    | -       | +    | +   | -    | -   | -       | -   | +      | -   | +      | +   | -   | +      | -     | (6)      |
| Innisfail, North Queensland, Australia<br>BioProject accession: PRJNA630779                                                                            | -    | -   | +    | +       | -    | +   | -    | -   | -       | -   | +      | -   | +      | +   | -   | +      | -     | (8)      |
| Innisfail, Australia<br>BioProject accession: PRJNA545086                                                                                              | -    | -   | +    | +       | -    | +   | -    | -   | -       | -   | +      | -   | +      | +   | -   | +      | -     | (9)      |
| North Queensland Strain, Australia<br>GEO accession: PRJNA255495                                                                                       | -    | -   | +    | +       | +    | +   | -    | -   | -       | -   | +      | -   | +      | +   | -   | +      | -     | (7)      |
| Townsville, Queensland, Australia<br>GEO accession: GSE100917<br>BioProject accession: PRJNA393424                                                     | -    | -   | +    | -       | +    | +   | -    | -   | -       | -   | +      | -   | +      | +   | -   | -      | -     | (10)     |
| Kampong Cham, Cambodia<br>BioProject: PRJNA556544                                                                                                      | -    | -   | +    | -       | +    | +   | -    | -   | -       | -   | -      | -   | -      | +   | -   | -      | -     | (4)      |
| Phnom Penh, Cambodia<br>BioProject: PRJNA556544<br>SRA accession: SRR9830742                                                                           | -    | -   | +    | -       | +    | +   | -    | -   | -       | -   | -      | -   | -      | +   | -   | -      | -     | (4)      |
| Fuzhou, Fujian province, China<br>BioProject accession: PRJNA476690                                                                                    | -    | -   | -    | -       | -    | -   | -    | -   | -       | -   | -      | -   | -      | -   | -   | -      | -     | (11)     |
| Bora-Bora, French Polynesia<br>BioProject accession: PRJEB15531                                                                                        | +    | -   | -    | -       | +    | -   | -    | -   | -       | -   | -      | -   | +      | -   | -   | -      | -     | (12)     |
| Bora-Bora, French Polynesia<br>BioProject accession: PRJEB1859                                                                                         | +    | -   | -    | -       | +    | -   | -    | -   | -       | -   | -      | -   | +      | -   | -   | -      | -     | (13, 14) |

|                                                                                                         |             |            |             |                |             |            |             |            |                |            |               |            |               |            |            |               |              |            |
|---------------------------------------------------------------------------------------------------------|-------------|------------|-------------|----------------|-------------|------------|-------------|------------|----------------|------------|---------------|------------|---------------|------------|------------|---------------|--------------|------------|
| Bora-Bora, French Polynesia<br>BioProject accession: PRJEB32622                                         | +           | -          | -           | -              | +           | -          | -           | -          | -              | -          | -             | -          | +             | -          | -          | -             | -            | (15)       |
| <b>Colony designation, City and country of original catch and Accession number</b>                      | <b>AeAV</b> | <b>FoV</b> | <b>PCLV</b> | <b>GMQLV-1</b> | <b>CFAV</b> | <b>HTV</b> | <b>LTLV</b> | <b>RaV</b> | <b>AeBNV-1</b> | <b>ReV</b> | <b>APLV-1</b> | <b>VeV</b> | <b>ATLV-1</b> | <b>ATV</b> | <b>CYV</b> | <b>AOLV-1</b> | <b>TMTLV</b> | <b>REF</b> |
| Toahotu, Tahiti, French Polynesia<br>BioProject accession: PRJNA382618                                  | -           | -          | -           | -              | -           | -          | -           | -          | -              | -          | -             | -          | -             | -          | -          | -             | -            | (16)       |
| New Delhi, India                                                                                        | -           | -          | +           | -              | -           | -          | -           | -          | -              | -          | +             | -          | +             | +          | +          | -             | -            | (17)       |
| Xayaboury, Luang Prabang, Vientiane Capital, Saravane, Attapeu Laos<br>BioProject accession: PRJEB37991 | -           | -          | -           | -              | +           | -          | -           | -          | -              | -          | +             | -          | -             | -          | -          | -             | -            | (18)       |
| Jinjang, Selangor, Malaysia<br>BioProject accession: PRJNA320356                                        | +           | -          | -           | -              | -           | -          | -           | -          | -              | -          | -             | -          | +             | -          | -          | -             | -            | (19)       |
| Bangkok, Thailand<br>BioProject accession: PRJNA413709                                                  | +           | -          | +           | +              | +           | +          | -           | -          | +              | +          | -             | +          | +             | +          | -          | -             | -            | (5)        |
| Bangkok, Thailand<br>BioProject accession: PRJNA612326                                                  | +           | -          | -           | -              | -           | -          | -           | -          | +              | -          | -             | -          | +             | -          | -          | -             | -            | (20)       |
| Kamphaeng Phet, Thailand<br>BioProject accession: PRJNA310013                                           | +           | -          | +           | +              | -           | +          | -           | -          | +              | -          | -             | -          | +             | -          | -          | -             | -            | (21)       |
| Kamphaeng Phet, Thailand<br>BioProject accession: PRJNA487089                                           | +           | -          | +           | +              | +           | +          | -           | -          | -              | -          | +             | +          | +             | -          | -          | -             | -            | (22)       |
| Kamphaeng Phet Province, Thailand<br>BioProject accession: PRJNA482553                                  | +           | -          | -           | -              | -           | +          | -           | -          | -              | -          | +             | -          | -             | -          | -          | -             | -            | (23)       |
| Nakhonsawan, Thailand<br>BioProject accession: PRJEB15531                                               | -           | -          | +           | -              | -           | +          | -           | -          | +              | +          | -             | -          | +             | -          | -          | -             | -            | (12)       |
| Nakhon Nayok Province, Thailand<br>BioProject accession: PRJNA276135                                    | +           | -          | +           | -              | -           | +          | -           | -          | -              | +          | -             | +          | +             | +          | -          | -             | -            | (24)       |
| Phetchaburi, Thailand<br>BioProject accession: PRJEB15531                                               | -           | -          | +           | +              | +           | +          | -           | -          | +              | -          | -             | -          | +             | -          | -          | -             | -            | (12)       |
| Thep Na Korn (KPP), Thailand<br>BioProject accession: PRJNA386455                                       | +           | -          | +           | -              | +           | +          | -           | -          | -              | +          | +             | +          | -             | +          | -          | -             | -            | (25)       |
| Thep Na Korn (KPP), Thailand<br>BioProject accession: PRJNA540058                                       | -           | -          | -           | -              | +           | -          | -           | -          | -              | -          | -             | -          | -             | -          | +          | -             | -            | (26)       |
| Rayong (T32), Thailand<br>BioProject accession: PRJNA233429                                             | +           | -          | -           | +              | -           | +          | -           | -          | -              | -          | -             | -          | -             | +          | -          | -             | -            | (2)        |
| Ang Mo Kio, Singapore                                                                                   | -           | -          | +           | -              | +           | +          | -           | -          | -              | -          | +             | -          | +             | -          | -          | -             | -            | (27)       |
| Ang Mo Kio, Singapore<br>BioProject accession: PRJNA533031                                              | -           | -          | +           | -              | +           | +          | -           | -          | -              | -          | +             | -          | +             | -          | -          | -             | -            | (28)       |
| <b>American</b>                                                                                         |             |            |             |                |             |            |             |            |                |            |               |            |               |            |            |               |              |            |
| Tapachula, Mexico<br>BioProject accession: PRJNA615972                                                  | +           | -          | +           | -              | -           | +          | -           | -          | -              | -          | +             | -          | -             | -          | -          | -             | -            | (40)       |
| Humaita, Tubiacanga and Belford Roxo, Rio de Janeiro, Brazil<br>BioProject accession: PRJNA277466       | -           | -          | +           | -              | -           | +          | -           | -          | -              | -          | -             | -          | -             | -          | -          | -             | -            | (29)       |
| Humaita, Tubiacanga and Belford Roxo, Rio de Janeiro, Brazil<br>BioProject accession: PRJNA401335       | -           | -          | +           | -              | -           | +          | -           | -          | -              | -          | -             | -          | -             | -          | -          | -             | -            | (30)       |
| Nova Iguaçu, Rio de Janeiro, Brazil<br>BioProject accession: PRJNA327841                                | -           | -          | +           | -              | -           | +          | -           | -          | -              | -          | -             | -          | -             | -          | -          | -             | -            | (31)       |
| St-Georges & Cayenne, French Guiana<br>BioProject accession: PRJEB15531                                 | +           | -          | +           | -              | +           | +          | -           | -          | +              | +          | -             | -          | +             | +          | -          | -             | -            | (12)       |
| Les Abymes & Petit-Bourg, Guadeloupe<br>BioProject accession: PRJNA515586                               | +           | -          | +           | +              | +           | +          | -           | -          | -              | +          | +             | -          | +             | +          | -          | -             | -            | (32)       |

[illegible]

| Colony designation, City and country of original catch and Accession number                       | AeAV | FoV | PCLV | GMQLV-1 | CAFAV | HTV | LTLV | RaV | AeBNV-1 | ReV | APLV-1 | VeV | ATLV-1 | ATV | CYV | AOLV-1 | TMTLV | REF   |
|---------------------------------------------------------------------------------------------------|------|-----|------|---------|-------|-----|------|-----|---------|-----|--------|-----|--------|-----|-----|--------|-------|-------|
| Higgs White Eye (HWE) strain (Variant of Rex-D), Puerto Rico<br>BioProject accession: PRJNA475410 | -    | -   | -    | -       | -     | -   | +    | -   | -       | -   | -      | -   | -      | -   | -   | -      | -     | (53)  |
| Rockefeller strain (ROCK)<br>BioProject accession: PRJNA396016                                    | -    | -   | -    | -       | -     | -   | -    | -   | -       | -   | -      | -   | -      | -   | -   | -      | -     | (3)   |
| Rockefeller strain<br>BioProject accession: PRJNA525617                                           | -    | -   | -    | -       | -     | -   | -    | -   | -       | -   | -      | -   | -      | -   | -   | -      | -     | (54)  |
| Rockefeller strain (ROCK)<br>BioProject accession: PRJNA388655                                    | -    | -   | -    | -       | -     | -   | -    | -   | -       | -   | -      | -   | -      | -   | -   | -      | -     | (55)  |
| Rockefeller strain (ROCK)<br>BioProject accession: PRJNA311123                                    | -    | -   | -    | -       | -     | -   | -    | -   | -       | -   | -      | -   | -      | -   | -   | -      | -     | (56)  |
| Rockefeller strain, (ROCK)<br>BioProject accession: PRJNA379149                                   | -    | -   | -    | -       | -     | -   | -    | -   | -       | -   | -      | -   | -      | -   | -   | -      | -     | (57)  |
| Rockefeller strain (ROCK)<br>BioProject accession: PRJNA54037                                     | -    | -   | -    | -       | -     | -   | -    | -   | -       | -   | -      | -   | -      | -   | -   | -      | -     | (58)  |
| Rockefeller strain (ROCK)<br>BioProject accession: PRJNA246607                                    | -    | -   | -    | -       | -     | -   | -    | -   | -       | -   | -      | -   | -      | -   | -   | -      | -     | (59)  |
| Rockefeller (ROCK) (Publication)<br>Liverpool (Metadata)<br>BioProject accession: PRJNA314871     | -    | -   | -    | -       | -     | -   | -    | -   | -       | -   | -      | -   | +      | -   | -   | -      | -     | (60)  |
| Rockefeller (ROCK)<br>BioProject accession: PRJNA507369                                           | -    | -   | -    | -       | -     | -   | -    | -   | -       | -   | -      | -   | -      | -   | -   | -      | +     | (61)  |
| Rockefeller (ROCK)<br>BioProject accession: PRJNA551490                                           | -    | -   | -    | -       | -     | -   | -    | -   | -       | -   | -      | -   | -      | -   | -   | -      | -     | (62)  |
| UGAL mGFP (transgenic strain)<br>BioProject accession: PRJNA79693                                 | -    | -   | -    | -       | -     | -   | -    | -   | -       | -   | -      | -   | -      | -   | -   | -      | -     | (63)  |
| UGAL/Rockefeller<br>BioProject accession: PRJNA360643                                             | -    | -   | -    | -       | -     | -   | -    | -   | -       | -   | -      | -   | -      | -   | -   | -      | -     | (64)  |
| UGAL/Rockefeller<br>BioProject accession: PRJNA340082                                             | -    | -   | -    | -       | -     | -   | -    | -   | -       | -   | -      | -   | -      | -   | -   | -      | -     | (65)  |
| UGAL New Mexico State University<br>BioProject accession: PRJNA246243                             | -    | -   | -    | -       | -     | -   | -    | -   | -       | -   | -      | -   | -      | -   | -   | -      | -     | (66)  |
| UGA<br>BioProject accession: PRJNA421500                                                          | -    | -   | -    | -       | -     | -   | -    | -   | -       | -   | -      | -   | -      | -   | -   | -      | -     | (67)  |
| UGAL<br>BioProject accession: PRJNA598930                                                         | -    | -   | -    | -       | -     | -   | -    | -   | -       | -   | -      | -   | -      | -   | -   | -      | -     | (124) |
| Liverpool, kh <sup>w</sup> (white eye)<br>BioProject accession: PRJNA261751                       | -    | -   | -    | -       | -     | -   | +    | -   | -       | -   | -      | -   | +      | -   | -   | -      | -     | (88)  |
| Liverpool, kh <sup>w</sup> (white eye)<br>BioProject accession: PRJNA214946                       | -    | -   | -    | -       | -     | -   | -    | -   | -       | -   | -      | -   | +      | -   | -   | -      | -     | (68)  |
| Liverpool strain<br>BioProject accession: PRJNA147359                                             | -    | -   | -    | -       | -     | -   | -    | -   | -       | -   | -      | -   | +      | -   | -   | -      | -     | (69)  |
| Liverpool strain<br>BioProject accession: PRJEB15531                                              | -    | -   | -    | -       | +     | -   | -    | -   | -       | +   | -      | -   | +      | -   | -   | -      | -     | (12)  |
| Liverpool strain<br>GEO Accession: GSE35161<br>BioProject accession: PRJNA150789                  | -    | -   | -    | -       | -     | -   | +    | -   | -       | -   | -      | -   | +      | -   | -   | -      | -     | (70)  |
| Liverpool strain<br>BioProject accession: PRJNA232374                                             | -    | -   | -    | -       | -     | -   | +    | -   | -       | -   | -      | -   | +      | -   | -   | -      | -     | (71)  |
| Liverpool strain (Tu strain)<br>GEO Accession: GSE34480<br>BioProject accession: PRJNA151475      | -    | -   | -    | -       | -     | -   | +    | -   | -       | -   | -      | -   | +      | -   | -   | -      | -     | (72)  |
| Liverpool strain<br>BioProject accession: PRJNA319716                                             | -    | -   | -    | -       | -     | -   | -    | -   | -       | -   | -      | -   | +      | -   | -   | -      | -     | (73)  |
| Liverpool strain Colorado State University<br>BioProject accession: PRJNA261799                   | -    | -   | -    | -       | -     | -   | +    | -   | -       | -   | -      | -   | +      | -   | -   | -      | -     | (74)  |
| Liverpool strain<br>BioProject accession: PRJNA356717                                             | -    | -   | -    | -       | -     | -   | -    | -   | -       | -   | -      | -   | +      | -   | -   | -      | -     | (75)  |

| Colony designation, City and country of original catch and Accession number                                                          | AeAV | FoV | PCLV | GMQLV-1 | CFAV | HTV | LTLV | RaV | AeBNV-1 | ReV | APLV-1 | VeV | ATLV-1 | ATV | CYV | AOLV-1 | TMTLV | REF  |
|--------------------------------------------------------------------------------------------------------------------------------------|------|-----|------|---------|------|-----|------|-----|---------|-----|--------|-----|--------|-----|-----|--------|-------|------|
| Liverpool strain<br>BioProject accession: PRJNA298592                                                                                | -    | -   | -    | -       | -    | -   | -    | -   | +       | -   | -      | -   | +      | -   | -   | -      | -     | (76) |
| Liverpool strain<br>BioProject accession: PRJNA445828                                                                                | -    | -   | -    | -       | -    | -   | +    | -   | -       | -   | -      | -   | +      | -   | -   | -      | -     | (77) |
| Liverpool strain<br>BioProject accession: PRJNA192626                                                                                | -    | -   | -    | -       | -    | -   | -    | -   | -       | -   | -      | -   | -      | -   | -   | -      | -     | (35) |
| Liverpool strain<br>Pasteur Institute (Paris, France)<br>BioProject accession: PRJEB23850                                            | -    | -   | -    | -       | +    | -   | -    | -   | -       | -   | -      | -   | +      | -   | -   | -      | -     | (78) |
| Liverpool strain<br>BioProject accession: PRJNA132131                                                                                | -    | -   | -    | -       | -    | -   | -    | -   | +       | -   | -      | -   | -      | -   | -   | -      | -     | (79) |
| Liverpool strain<br>GEO accession: GSE24872<br>BioProject accession: PRJNA132131                                                     | -    | -   | -    | -       | -    | -   | -    | -   | -       | -   | -      | -   | -      | -   | -   | -      | -     | (80) |
| Liverpool (Black-eyed strain)<br>GEO Accession: GSE53664<br>BioProject accession: PRJNA232599                                        | -    | -   | -    | -       | -    | -   | +    | -   | -       | -   | -      | -   | +      | -   | -   | -      | -     | (81) |
| Liverpool strain<br>BioProject accession: PRJNA255467                                                                                | -    | -   | -    | -       | -    | -   | -    | -   | -       | -   | -      | -   | +      | -   | -   | -      | -     | (82) |
| Liverpool strain LVP_ib12<br>BioProject accession: PRJNA209388,<br>PRJNA419241                                                       | -    | -   | -    | -       | -    | -   | -    | -   | -       | -   | -      | -   | -      | -   | -   | -      | -     | (83) |
| Liverpool strain (LVPIB12)<br>BioProject accession: PRJNA236239                                                                      | -    | -   | -    | -       | -    | -   | -    | -   | -       | -   | -      | -   | -      | -   | -   | -      | -     | (84) |
| Liverpool (Black-eyed strain)<br>BioProject accession: PRJNA503353,<br>PRJNA294263, PRJNA294264,<br>PRJNA294265 and PRJNA294281.     | -    | -   | -    | -       | -    | -   | -    | -   | -       | -   | -      | -   | +      | -   | -   | -      | -     | (85) |
| Liverpool strain (LVP-IB12)<br>BioProject accession: SAMN00006233                                                                    | -    | -   | -    | -       | -    | -   | -    | -   | -       | -   | -      | -   | -      | -   | -   | -      | -     | (86) |
| Liverpool strain (Strain LVP-IB12, Eggs,<br>MRA-735) Liverpool (Black-eyed strain) NR-<br>48921<br>BioProject accession: PRJNA595990 | -    | -   | -    | -       | -    | -   | -    | -   | -       | -   | -      | -   | +      | -   | -   | -      | -     | (87) |
| Bayer laboratory colony (Likely Liverpool<br>Strain)<br>BioProject accession: PRJNA383480                                            | -    | -   | -    | -       | -    | -   | -    | -   | -       | -   | -      | -   | +      | -   | -   | -      | -     | (89) |

**Legend:** **AeAV:** Aedes aegypti anphevirus, **FoV:** Formosus virus, **GMQLV-1:** Guadeloupe mosquito quaranja-like virus 1, **PCLV:** Phasi Charoen Like virus, **CFAV:** Cell fusing agent virus, **HTV:** Humaita-Tubiacanga virus, **LTLV:** Liverpool tombus-like virus, **RaV:** Rabai virus, **AeBNV-1:** Aedes bi-negev like virus 1, **VeV:** Verdadero virus, **ATLV-1:** Aedes aegypti toti-like virus 1, **ATV:** Aedes aegypti toti virus, **CYV:** Culex Y virus, **AOLV-1:** Aedes orbi-like virus 1

Table S4. Incidence of ISVs in *Aedes albopictus* colonies and wild-caught samples

| Colony designation, City and country of original catch                                                    | AaAV | SGM | LMCV | APV | AOMV-2 | UsV | JMTV | AeFV | AaNLV | AeBNV-2 | TMTLV | LTLV | FTBLV | WBLV-4 | DANV | NeV | AaIDNV-2 | CpDNV | REF        |
|-----------------------------------------------------------------------------------------------------------|------|-----|------|-----|--------|-----|------|------|-------|---------|-------|------|-------|--------|------|-----|----------|-------|------------|
| <b>American samples</b>                                                                                   |      |     |      |     |        |     |      |      |       |         |       |      |       |        |      |     |          |       |            |
| Chiapas, Mexico<br>BioProject accession: PRJNA505498                                                      | -    | -   | -    | -   | -      | -   | -    | -    | -     | -       | -     | -    | -     | +      | -    | -   | -        | -     | (37)       |
| Gainesville (MRA-804), USA<br>BioProject accession: PRJNA327857                                           | -    | -   | -    | -   | -      | -   | -    | -    | -     | -       | +     | -    | -     | -      | -    | -   | -        | -     | (90)       |
| Gainesville (MRA-804), USA<br>BioProject accession: PRJNA232489, PRJNA279095                              | +    | -   | -    | -   | -      | -   | -    | -    | -     | -       | +     | -    | -     | -      | -    | -   | -        | -     | (91, 92)   |
| Manassas, USA<br>BioProject accession: PRJNA268379                                                        | +    | -   | -    | +   | -      | -   | -    | -    | -     | +       | +     | -    | -     | +      | -    | +   | -        | -     | (93)       |
| Manassas, United States of America<br>BioProject accession: PRJNA71721                                    | +    | -   | -    | -   | -      | -   | -    | -    | -     | -       | +     | -    | -     | -      | -    | +   | -        | -     | (94)       |
| Manassas, USA<br>BioProject accession: PRJNA158021                                                        | +    | -   | -    | +   | -      | -   | -    | -    | -     | -       | +     | -    | -     | +      | -    | -   | +        | -     | (95)       |
| Manassas, USA<br>BioProject accession: PRJNA187045                                                        | +    | -   | -    | +   | -      | -   | -    | -    | -     | -       | +     | -    | -     | +      | -    | -   | +        | -     | (96)       |
| Manassas, USA<br>BioProject accession: PRJNA360961                                                        | +    | -   | -    | +   | -      | -   | -    | -    | -     | -       | +     | -    | -     | +      | -    | -   | -        | -     | (97)       |
| Manassas, USA<br>BioProject accession: PRJNA694122                                                        | -    | -   | -    | -   | -      | -   | -    | -    | -     | -       | +     | -    | -     | +      | -    | -   | -        | -     | (98)       |
| New Jersey, USA<br>BioProject accession: PRJNA223166                                                      | +    | -   | -    | +   | -      | -   | -    | -    | -     | -       | -     | -    | -     | +      | -    | -   | -        | -     | (99)       |
| San Gabriel Valley, CA, USA<br>BioProject accession: PRJNA563095                                          | +    | +   | -    | +   | -      | +   | -    | -    | -     | -       | -     | -    | -     | -      | -    | +   | -        | -     | (100)      |
| San Gabriel Valley, CA, USA<br>BioProject accession: PRJNA610833                                          | +    | +   | -    | +   | -      | -   | -    | -    | -     | -       | -     | -    | -     | -      | +    | +   | -        | -     | (101)      |
| Wise County, Virginia, USA<br>BioProject accession: PRJNA147359                                           | +    | -   | -    | -   | -      | -   | -    | -    | -     | -       | -     | -    | -     | -      | -    | +   | -        | -     | (69)       |
| Wise County, Virginia, USA<br>BioProject accession: PRJNA214946                                           | -    | -   | -    | -   | -      | -   | -    | -    | -     | -       | +     | +    | +     | -      | -    | -   | -        | -     | (68)       |
| <b>Australian/ Asian Samples</b>                                                                          |      |     |      |     |        |     |      |      |       |         |       |      |       |        |      |     |          |       |            |
| Torres Strait Islands, Australia<br>BioProject accession: PRJNA450281                                     | -    | -   | -    | -   | +      | -   | -    | -    | -     | -       | -     | -    | -     | -      | -    | -   | -        | -     | (102, 103) |
| Foshan strain, Guangdong, China<br>Housed at the University of Pavia<br>BioProject accession: PRJNA607026 | -    | -   | -    | -   | -      | -   | -    | -    | -     | -       | +     | -    | -     | -      | -    | +   | -        | -     | (104, 105) |
| Foshan strain, Guangdong, China<br>BioProject accession: PRJNA577831                                      | -    | -   | -    | -   | -      | -   | -    | -    | -     | -       | -     | -    | +     | -      | -    | -   | -        | -     | (106)      |
| Foshan strain, Guangdong, China<br>BioProject accession: PRJNA178303                                      | -    | -   | -    | -   | -      | -   | -    | -    | -     | -       | -     | -    | -     | -      | -    | +   | -        | -     | (107)      |
| Foshan strain, Guangdong, China<br>BioProject accession: PRJNA275727                                      | -    | -   | -    | -   | +      | -   | -    | -    | -     | -       | -     | -    | -     | -      | -    | -   | -        | +     | (88)       |
| Foshan strain, Guangdong, China<br>BioProject accession: PRJNA266286                                      | -    | -   | -    | -   | -      | -   | -    | -    | -     | -       | -     | -    | -     | -      | -    | -   | -        | -     | (108)      |
| Foshan strain, Guangdong, China<br>BioProject accession: PRJNA236401                                      | -    | -   | -    | -   | -      | -   | -    | -    | -     | -       | -     | -    | +     | -      | -    | +   | -        | +     | (109, 110) |
| Foshan strain, Guangdong, China<br>BioProject accession: PRJNA270274                                      | -    | -   | -    | -   | +      | -   | -    | -    | -     | -       | -     | -    | -     | +      | -    | -   | -        | +     | (111)      |
| Foshan strain, Guangdong, China<br>BioProject accession: PRJNA495114                                      | -    | -   | -    | -   | -      | -   | -    | -    | -     | -       | +     | -    | +     | -      | -    | -   | -        | +     | (112)      |

|                                                                                   |             |            |             |            |               |            |             |             |              |                |              |             |              |               |             |            |                 |              |            |
|-----------------------------------------------------------------------------------|-------------|------------|-------------|------------|---------------|------------|-------------|-------------|--------------|----------------|--------------|-------------|--------------|---------------|-------------|------------|-----------------|--------------|------------|
| Longgang District, Shenzhen, China<br>BioProject accession: PRJNA475859           | +           | -          | +           | +          | -             | -          | -           | -           | +            | +              | -            | -           | -            | +             | -           | -          | -               | -            | (113)      |
| <b>Colony designation, City and country of original catch</b>                     | <b>AaAV</b> | <b>SGM</b> | <b>LMCV</b> | <b>APV</b> | <b>AOMV-2</b> | <b>UsV</b> | <b>JMTV</b> | <b>AeFV</b> | <b>AaNLV</b> | <b>AeBNV-2</b> | <b>TMTLV</b> | <b>LTLV</b> | <b>FTBLV</b> | <b>WBLV-4</b> | <b>DANV</b> | <b>NeV</b> | <b>AalDNV-2</b> | <b>CpDNV</b> | <b>REF</b> |
| Yunnan, China<br>BioProject accession: PRJNA472635<br>SRA accession: SRR7204305   | +           | +          | -           | +          | -             | +          | -           | -           | -            | -              | -            | -           | -            | +             | -           | -          | -               | +            | (114)      |
| Yunnan, China<br>BioProject accession: PRJNA474574<br>SRA accession: SRR7286979   | -           | -          | -           | -          | -             | -          | -           | -           | +            | -              | -            | -           | -            | +             | -           | -          | -               | +            | (115)      |
| Zhejiang, China<br>BioProject accession: PRJNA271540<br>SRA accession: SRR1745767 | +           | -          | -           | +          | +             | +          | -           | -           | +            | -              | -            | -           | -            | +             | -           | +          | -               | +            | (125)      |
| Kawasaki, Kanagawa Prefecture, Japan<br>BioProject accession: PRJNA587399         | +           | +          | -           | -          | -             | -          | -           | -           | -            | -              | +            | -           | -            | +             | +           | -          | -               | -            | (117)      |
| Kuala Lumpur, Malaysia<br>BioProject accession: PRJNA694122                       | +           | -          | -           | -          | -             | -          | -           | -           | -            | -              | +            | -           | -            | +             | -           | -          | -               | -            | (98)       |
| Phu Hoa, Binh Duong Province Vietnam<br>BioProject accession: PRJNA293817         | -           | -          | -           | +          | -             | -          | -           | -           | -            | -              | +            | -           | -            | +             | +           | -          | -               | -            | (118)      |
| Phu Hoa, Binh Duong Province Vietnam<br>BioProject accession: PRJNA587399         | -           | -          | -           | +          | -             | -          | -           | -           | -            | -              | +            | -           | -            | +             | +           | +          | -               | -            | (117)      |
| <b>European</b>                                                                   |             |            |             |            |               |            |             |             |              |                |              |             |              |               |             |            |                 |              |            |
| Nice, France<br>BioProject accession: PRJNA449278                                 | -           | -          | -           | -          | -             | -          | -           | +           | -            | -              | +            | -           | -            | -             | -           | -          | -               | -            | (119)      |
| Athens, Greece<br>BioProject accession: PRJNA282718                               | -           | -          | -           | -          | -             | -          | -           | -           | -            | -              | -            | -           | -            | -             | -           | -          | -               | -            | (120)      |
| Rome, Italy<br>BioProject accession: PRJNA314492                                  | +           | -          | -           | +          | +             | -          | -           | -           | -            | -              | -            | -           | -            | +             | -           | -          | -               | -            | (121)      |
| Rimini, Italy<br>BioProject accession: PRJNA493544                                | -           | -          | -           | -          | -             | -          | +           | -           | -            | -              | -            | -           | -            | -             | -           | -          | -               | -            | (122)      |
| Ticino, Muzzano Switzerland<br>SRA accession: PRJNA638077                         | +           | +          | -           | +          | +             | +          | -           | -           | -            | -              | -            | -           | -            | +             | -           | +          | -               | -            | (123)      |

**Legend:** **SGM:** San Gabriel Mononegavirus, **AaAV:** Aedes albopictus Anphevirus (126), **LMCV:** Longgang mosquito chu-like virus, **APV:** Aedes phasma-virus (127), **AOMV-2:** Aedes orthomyxo-like virus 2, **UsV:** Usinis virus, **JMTV:** Jingmen tick virus, **AeFV:** Aedes flavivirus, **AaNLV:** Aedes albopictus negev-like virus (128), **AeBNV-2:** Aedes bi-negev like virus 2, **TMTLV:** Tiger mosquito bi-segmented tombus-like virus, **LTLV:** Liverpool tombus-like virus, **FTBLV:** Foshan tombus-like virus, **WBLV-4:** Wenzhou sobemo-like virus 4, **DANV:** Drosophila American nodavirus, **AalDNV-2:** Aedes albopictus densovirus 2, **CpDNV:** Culex pipiens densovirus

Table S5. Incidence of ISVs in *Aedes aegypti* and *Aedes albopictus* cell lines

[illegible]

|                                                              |            |             |            |             |              |             |             |             |              |                 |                |             |            |               |
|--------------------------------------------------------------|------------|-------------|------------|-------------|--------------|-------------|-------------|-------------|--------------|-----------------|----------------|-------------|------------|---------------|
| U4.4 PRJNA525601                                             | (137)      | -           | -          | +           | -            | -           | -           | -           | -            | -               | -              | -           | +          | -             |
| <b>Cell lines</b>                                            | <b>REF</b> | <b>AeAV</b> | <b>SGM</b> | <b>PCLV</b> | <b>AaNLV</b> | <b>CFAV</b> | <b>LTLV</b> | <b>FTLV</b> | <b>TMTLV</b> | <b>AalDNV-2</b> | <b>WSBLV-4</b> | <b>DANV</b> | <b>CYV</b> | <b>CppDNV</b> |
| C6/36 PRJNA464394 Total-RNA                                  | (134)      | -           | -          | -           | -            | -           | -           | -           | -            | -               | -              | -           | -          | -             |
| C6/36 PRJNA436549 mRNA                                       | (141)      | -           | -          | -           | -            | -           | -           | -           | -            | -               | -              | -           | -          | -             |
| C6/36 PRJNA610833: SRR11252294 sRNA                          | (101)      | -           | -          | +           | -            | -           | -           | -           | -            | +               | +              | +           | -          | -             |
| C6/36 PRJNA610833: SRR11252293 sRNA                          | (101)      | -           | -          | +           | -            | -           | -           | -           | -            | +               | -              | -           | -          | -             |
| C6/36 PRJNA556544 vRNA                                       | (4)        | -           | -          | -           | -            | -           | -           | -           | -            | +               | -              | +           | -          | -             |
| C6/36 PRJNA703391 mRNA                                       | (142)      | -           | -          | -           | -            | -           | -           | -           | -            | -               | -              | -           | -          | -             |
| C6/36 PRJNA516868 mRNA                                       | (143)      | -           | -          | -           | -            | -           | -           | -           | -            | -               | -              | -           | -          | -             |
| C6/36 PRJNA503588 vRNA                                       | (26)       | -           | -          | -           | -            | -           | -           | -           | +            | +               | -              | +           | -          | -             |
| C6/36 PRJNA540058 vRNA                                       | (26)       | -           | -          | -           | -            | -           | -           | -           | +            | +               | -              | +           | -          | -             |
| C6/36 PRJNA565571 mRNA                                       | (144)      | -           | -          | -           | -            | -           | -           | -           | -            | -               | -              | -           | +          | -             |
| C6/36 PRJNA449278 mRNA                                       | (119)      | -           | -          | -           | -            | -           | -           | -           | +            | +               | -              | +           | -          | -             |
| C6/36 PRJNA430004 mRNA                                       | (145)      | -           | -          | -           | -            | -           | -           | -           | -            | -               | -              | +           | -          | -             |
| C6/36 PRJNA345486 mRNA                                       | (146)      | -           | -          | -           | -            | -           | -           | -           | -            | -               | -              | -           | -          | -             |
| C6/36 PRJNA525601                                            | (137)      | -           | -          | -           | -            | -           | -           | -           | -            | -               | -              | -           | -          | -             |
| C6/36 PRJNA374578 sRNA                                       | (147)      | -           | -          | -           | -            | -           | -           | -           | -            | -               | -              | -           | -          | +             |
| C6/36 SRP062828 sRNA                                         | (118)      | -           | -          | -           | -            | -           | -           | -           | -            | -               | -              | +           | +          | -             |
| C6/36 PRJNA147359 sRNA                                       | (69)       | -           | -          | -           | -            | -           | +           | +           | -            | +               | -              | -           | -          | -             |
| <b>Wolbachia infected Aedes cells</b>                        |            |             |            |             |              |             |             |             |              |                 |                |             |            |               |
| <i>Ae. albopictus</i> wAlbB Aa23 PRJNA670506                 | (148)      | +           | +          | -           | +            | -           | -           | -           | -            | +               | +              | -           | -          | -             |
| <i>Ae. albopictus</i> RML-12.wMelPop PRJNA227164             | (149)      | +           | +          | +           | -            | -           | -           | -           | -            | -               | +              | -           | -          | -             |
| <i>Ae. albopictus</i> C6/36.wMelPop PRJNA516868, PRJNA266744 | (143, 150) | +           | +          | +           | -            | -           | -           | -           | -            | -               | +              | -           | -          | -             |
| <i>Ae. aegypti</i> Aag2.wMelPop PRJNA238976                  | (130, 131) | +           | +          | +           | -            | -           | -           | -           | -            | +               | +              | -           | -          | -             |
| <i>Ae. aegypti</i> wAlbB PRJNA670506                         | (148)      | +           | +          | +           | +            | -           | -           | -           | -            | +               | -              | -           | -          | -             |

Legend: **AeAV**: Aedes aegypti anphevirus, **SGM**: San Gabriel Mononegavirus **PCLV**: Phasi Charoen Like virus, **AaNLV**: Aedes albopictus negev-like virus, **CFAV**: Cell fusing agent virus, **LTLV**: Liverpool tombus-like virus, **FTBLV**: Foshan tombus-like virus, **TMTLV**: Tiger mosquito bi-segmented tombus-like virus, **AalDNV-2**: Aedes albopictus densovirus, **WSBL-4**: Wenzhou-Sobemo like virus 4, **DANV**: Drosophila American nodavirus, **CYV**: Culex Y virus, **CpDNV**: Culex pipiens densovirus

## Supplementary Tables: References

1. Suzuki Y, Frangeul L, Dickson LB, Blanc H, Verdier Y, Vinh J, Lambrechts L, Saleh MC. 2017. Uncovering the Repertoire of Endogenous Flaviviral Elements in *Aedes* Mosquito Genomes. *J Virol* 91:e00571-17.
2. McBride CS, Baier F, Omondi AB, Spitzer SA, Lutomiah J, Sang R, Ignell R, Vosshall LB. 2014. Evolution of mosquito preference for humans linked to an odorant receptor. *Nature* 515:222-7.
3. Eng MW, Clemons A, Hill C, Engel R, Severson DW, Behura SK. 2018. Multifaceted functional implications of an endogenously expressed tRNA fragment in the vector mosquito *Aedes aegypti*. *PLoS Negl Trop Dis* 12:e0006186.
4. Baidaliuk A, Miot EF, Lequime S, Moltini-Conclois I, Delaigue F, Dabo S, Dickson LB, Aubry F, Merkling SH, Cao-Lormeau VM, Lambrechts L. 2019. Cell-Fusing Agent Virus Reduces Arbovirus Dissemination in *Aedes aegypti* Mosquitoes In Vivo. *J Virol* 93:JVI.00705-19.
5. Zakrzewski M, Rasic G, Darbro J, Krause L, Poo YS, Filipovic I, Parry R, Asgari S, Devine G, Suhrbier A. 2018. Mapping the virome in wild-caught *Aedes aegypti* from Cairns and Bangkok. *Sci Rep* 8:4690.
6. Koh C, Allen SL, Herbert RI, McGraw EA, Chenoweth SF. 2018. The Transcriptional Response of *Aedes aegypti* with Variable Extrinsic Incubation Periods for Dengue Virus. *Genome Biol Evol* 10:3141-3151.
7. Etebari K, Osei-Amo S, Blomberg SP, Asgari S. 2015. Dengue virus infection alters post-transcriptional modification of microRNAs in the mosquito vector *Aedes aegypti*. *Sci Rep* 5:15968.
8. Wimalasiri-Yapa B, Barrero RA, Stassen L, Hafner LM, McGraw EA, Pyke AT, Jansen CC, Suhrbier A, Yakob L, Hu W, Devine GJ, Frentiu FD. 2021. Temperature modulates immune gene expression in mosquitoes during arbovirus infection. *Open Biol* 11:200246.
9. Slonchak A, Hugo LE, Freney ME, Hall-Mendelin S, Amarilla AA, Torres FJ, Setoh YX, Peng NYG, Sng JDJ, Hall RA, van den Hurk AF, Devine GJ, Khromykh AA. 2020. Zika virus noncoding RNA suppresses apoptosis and is required for virus transmission by mosquitoes. *Nat Commun* 11:2205.
10. Lee M, Etebari K, Hall-Mendelin S, van den Hurk AF, Hobson-Peters J, Vatipally S, Schnettler E, Hall R, Asgari S. 2017. Understanding the role of microRNAs in the interaction of *Aedes aegypti* mosquitoes with an insect-specific flavivirus. *J Gen Virol* 98:1892-1903.
11. Batool K, Alam I, Wu S, Liu W, Zhao G, Chen M, Wang J, Xu J, Huang T, Pan X, Yu X, Guan X, Xu L, Zhang L. 2018. Transcriptomic Analysis of *Aedes aegypti* in Response to Mosquitocidal *Bacillus thuringiensis* LLP29 Toxin. *Sci Rep* 8:12650.
12. Faucon F, Gaude T, Dusfour I, Navratil V, Corbel V, Juntarajumnong W, Girod R, Poupardin R, Boyer F, Reynaud S, David JP. 2017. In the hunt for genomic markers of metabolic resistance to pyrethroids in the mosquito *Aedes aegypti*: An integrated next-generation sequencing approach. *PLoS Negl Trop Dis* 11:e0005526.
13. Tetreau G, Bayyareddy K, Jones CM, Stalinski R, Riaz MA, Paris M, David JP, Adang MJ, Despres L. 2012. Larval midgut modifications associated with Bti resistance in the yellow fever mosquito using proteomic and transcriptomic approaches. *BMC Genomics* 13:248.
14. David JP, Faucon F, Chandor-Proust A, Poupardin R, Riaz MA, Bonin A, Navratil V, Reynaud S. 2014. Comparative analysis of response to selection with three insecticides in the dengue mosquito *Aedes aegypti* using mRNA sequencing. *BMC Genomics* 15:174.
15. Stalinski R, Laporte F, Tetreau G, Despres L. 2016. Receptors are affected by selection with each *Bacillus thuringiensis israelensis* Cry toxin but not with the full Bti mixture in *Aedes aegypti*. *Infect Genet Evol* 44:218-227.
16. Lequime S, Richard V, Cao-Lormeau VM, Lambrechts L. 2017. Full-genome dengue virus sequencing in mosquito saliva shows lack of convergent positive selection during transmission by *Aedes aegypti*. *Virus Evol* 3:vex031.
17. Shrinet J, Srivastava P, Sunil S. 2017. Transcriptome analysis of *Aedes aegypti* in response to mono-infections and co-infections of dengue virus-2 and chikungunya virus. *Biochem Biophys Res Commun* 492:617-623.
18. Cattel J, Haberkorn C, Laporte F, Gaude T, Cumer T, Renaud J, Sutherland IW, Hertz JC, Bonneville J, Arnaud V, Fustec B, Boyer S, Marcombe S, David J. 2021. A genomic amplification affecting a carboxylesterase gene cluster confers organophosphate resistance in the mosquito *Aedes aegypti*: From genomic characterization to high-throughput field detection. *Evol Appl* DOI: 10.1111/eva.13177.
19. Sutton ER, Yu Y, Shimeld SM, White-Cooper H, Alphey AL. 2016. Identification of genes for engineering the male germline of *Aedes aegypti* and *Ceratitis capitata*. *BMC Genomics* 17:948.
20. Camargo C, Ahmed-Braimah YH, Amaro IA, Harrington LC, Wolfner MF, Avila FW. 2020. Mating and blood-feeding induce transcriptome changes in the spermathecae of the yellow fever mosquito *Aedes aegypti*. *Sci Rep* 10:14899.
21. Alfonso-Parra C, Ahmed-Braimah YH, Degner EC, Avila FW, Villarreal SM, Pleiss JA, Wolfner MF, Harrington LC. 2016. Mating-Induced Transcriptome Changes in the Reproductive Tract of Female *Aedes aegypti*. *PLoS Negl Trop Dis* 10:e0004451.
22. Degner EC, Ahmed-Braimah YH, Borziak K, Wolfner MF, Harrington LC, Dorus S. 2019. Proteins, Transcripts, and Genetic Architecture of Seminal Fluid and Sperm in the Mosquito *Aedes aegypti*. *Mol Cell Proteomics* 18:S6-S22.
23. Halbach R, Miesen P, Joosten J, Taskopru E, Rondeel I, Pennings B, Vogels CBF, Merkling SH, Koenraadt CJ, Lambrechts L, van Rij RP. 2020. A satellite repeat-derived piRNA controls embryonic development of *Aedes*. *Nature* 580:274-277.

24. Chandler JA, Thongsripong P, Green A, Kittayapong P, Wilcox BA, Schroth GP, Kapan DD, Bennett SN. 2014. Metagenomic shotgun sequencing of a Bunyavirus in wild-caught *Aedes aegypti* from Thailand informs the evolutionary and genomic history of the Phleboviruses. *Virology* 464-465:312-319.
25. Raquin V, Merklings SH, Gausson V, Moltini-Conclois I, Frangeul L, Varet H, Dillies MA, Saleh MC, Lambrechts L. 2017. Individual co-variation between viral RNA load and gene expression reveals novel host factors during early dengue virus infection of the *Aedes aegypti* midgut. *PLoS Negl Trop Dis* 11:e0006152.
26. Baidaliuk A, Lequime S, Moltini-Conclois I, Dabo S, Dickson LB, Prot M, Duong V, Dussart P, Boyer S, Shi C, Matthijnssens J, Guglielmini J, Gloria-Soria A, Simon-Loriere E, Lambrechts L. 2020. Novel genome sequences of cell-fusing agent virus allow comparison of virus phylogeny with the genetic structure of *Aedes aegypti* populations. *Virus Evol* 6:veaa018.
27. Choy MM, Sessions OM, Gubler DJ, Ooi EE. 2015. Production of Infectious Dengue Virus in *Aedes aegypti* Is Dependent on the Ubiquitin Proteasome Pathway. *PLoS Negl Trop Dis* 9:e0004227.
28. Chowdhury A, Modahl CM, Tan ST, Wong Wei Xiang B, Misse D, Vial T, Kini RM, Pompon JF. 2020. JNK pathway restricts DENV2, ZIKV and CHIKV infection by activating complement and apoptosis in mosquito salivary glands. *PLoS Pathog* 16:e1008754.
29. Aguiar ER, Olmo RP, Paro S, Ferreira FV, de Faria IJ, Todjro YM, Lobo FP, Kroon EG, Meignin C, Gatherer D, Imler JL, Marques JT. 2015. Sequence-independent characterization of viruses based on the pattern of viral small RNAs produced by the host. *Nucleic Acids Res* 43:6191-206.
30. Olmo RP, Ferreira AGA, Izidoro-Toledo TC, Aguiar E, de Faria IJS, de Souza KPR, Osorio KP, Kuhn L, Hammann P, de Andrade EG, Todjro YM, Rocha MN, Leite T, Amadou SCG, Armache JN, Paro S, de Oliveira CD, Carvalho FD, Moreira LA, Marois E, Imler JL, Marques JT. 2018. Control of dengue virus in the midgut of *Aedes aegypti* by ectopic expression of the dsRNA-binding protein Loqs2. *Nat Microbiol* 3:1385-1393.
31. Bona AC, Chitolina RF, Fermino ML, de Castro Poncio L, Weiss A, Lima JB, Paldi N, Bernardes ES, Henen J, Maori E. 2016. Larval application of sodium channel homologous dsRNA restores pyrethroid insecticide susceptibility in a resistant adult mosquito population. *Parasit Vectors* 9:397.
32. Shi C, Beller L, Deboutte W, Yinda KC, Delang L, Vega-Rua A, Failloux AB, Matthijnssens J. 2019. Stable distinct core eukaryotic viromes in different mosquito species from Guadeloupe, using single mosquito viral metagenomics. *Microbiome* 7:121.
33. Bonizzoni M, Dunn WA, Campbell CL, Olson KE, Marinotti O, James AA. 2012. Strain Variation in the Transcriptome of the Dengue Fever Vector, *Aedes aegypti*. *G3 (Bethesda)* 2:103-14.
34. Bonizzoni M, Dunn WA, Campbell CL, Olson KE, Marinotti O, James AA. 2012. Complex modulation of the *Aedes aegypti* transcriptome in response to dengue virus infection. *PLoS One* 7:e50512.
35. Bonizzoni M, Britton M, Marinotti O, Dunn WA, Fass J, James AA. 2013. Probing functional polymorphisms in the dengue vector, *Aedes aegypti*. *BMC Genomics* 14:739.
36. Ruckert C, Prasad AN, Garcia-Luna SM, Robison A, Grubaugh ND, Weger-Lucarelli J, Ebel GD. 2019. Small RNA responses of *Culex* mosquitoes and cell lines during acute and persistent virus infection. *Insect Biochem Mol Biol* 109:13-23.
37. Fauver JR, Akter S, Morales AIO, Black WCt, Rodriguez AD, Stenglein MD, Ebel GD, Weger-Lucarelli J. 2019. A reverse-transcription/RNase H based protocol for depletion of mosquito ribosomal RNA facilitates viral intrahost evolution analysis, transcriptomics and pathogen discovery. *Virology* 528:181-197.
38. Canton PE, Cancino-Rodezno A, Gill SS, Soberon M, Bravo A. 2015. Transcriptional cellular responses in midgut tissue of *Aedes aegypti* larvae following intoxication with Cry11Aa toxin from *Bacillus thuringiensis*. *BMC Genomics* 16:1042.
39. Cross ST, Maertens BL, Dunham TJ, Rodgers CP, Brehm AL, Miller MR, Williams AM, Foy BD, Stenglein MD. 2020. Partitiviruses Infecting *Drosophila melanogaster* and *Aedes aegypti* Exhibit Efficient Biparental Vertical Transmission. *J Virol* 94: e01070-20.
40. Ferreira PG, Tesla B, Horacio ECA, Nahum LA, Brindley MA, de Oliveira Mendes TA, Murdock CC. 2020. Temperature Dramatically Shapes Mosquito Gene Expression With Consequences for Mosquito-Zika Virus Interactions. *Front Microbiol* 11:901.
41. Frey KG, Biser T, Hamilton T, Santos CJ, Pimentel G, Mokashi VP, Bishop-Lilly KA. 2016. Bioinformatic Characterization of Mosquito Viromes within the Eastern United States and Puerto Rico: Discovery of Novel Viruses. *Evol Bioinform Online* 12:1-12.
42. Kang DS, Barron MS, Lovin DD, Cunningham JM, Eng MW, Chadee DD, Li J, Severson DW. 2018. A transcriptomic survey of the impact of environmental stress on response to dengue virus in the mosquito, *Aedes aegypti*. *PLoS Negl Trop Dis* 12:e0006568.
43. Saldana MA, Etebari K, Hart CE, Widen SG, Wood TG, Thangamani S, Asgari S, Hughes GL. 2017. Zika virus alters the microRNA expression profile and elicits an RNAi response in *Aedes aegypti* mosquitoes. *PLoS Negl Trop Dis* 11:e0005760.
44. Etebari K, Hegde S, Saldana MA, Widen SG, Wood TG, Asgari S, Hughes GL. 2017. Global Transcriptome Analysis of *Aedes aegypti* Mosquitoes in Response to Zika Virus Infection. *mSphere* 2: e00456-17.
45. Lewis SH, Quarles KA, Yang Y, Tanguy M, Frézal L, Smith SA, Sharma PP, Cordaux R, Gilbert C, Giraud I. 2017. Pan-arthropod analysis reveals somatic piRNAs as an ancestral defence against transposable elements. *Nat Ecol Evol* 1: 174-181.
46. Metsky HC, Matranga CB, Wohl S, Schaffner SF, Freije CA, Winnicki SM, West K, Qu J, Baniecki ML, Gladden-Young A, Lin AE, Tomkins-Tinch CH, Ye SH, Park DJ, Luo CY, Barnes KG, Shah RR, Chak B, Barbosa-Lima G, Delatorre E, Vieira YR, Paul LM, Tan AL, Barcellona CM, Porcelli MC, Vasquez C, Cannons AC, Cone MR,

- Hogan KN, Kopp EW, Anzinger JJ, Garcia KF, Parham LA, Ramirez RMG, Montoya MCM, Rojas DP, Brown CM, Hennigan S, Sabina B, Scotland S, Gangavarapu K, Grubaugh ND, Oliveira G, Robles-Sikisaka R, Rambaut A, Gehrke L, Smole S, Halloran ME, Villar L, Mattar S, et al. 2017. Zika virus evolution and spread in the Americas. *Nature* 546:411-415.
47. Zhao L, Alto BW, Shin D, Yu F. 2018. The Effect of Permethrin Resistance on *Aedes aegypti* Transcriptome Following Ingestion of Zika Virus Infected Blood. *Viruses* 10: 470.
  48. Arensburger P, Hice RH, Wright JA, Craig NL, Atkinson PW. 2011. The mosquito *Aedes aegypti* has a large genome size and high transposable element load but contains a low proportion of transposon-specific piRNAs. *BMC Genomics* 12:606.
  49. Boyles SM, Mavian CN, Finol E, Ukhanova M, Stephenson CJ, Hamerlinck G, Kang S, Baumgartner C, Geesey M, Stinton I, Williams K, Mathias DK, Prosperi M, Mai V, Salemi M, Buckner EA, Lednický JA, Rivers AR, Dinglasan RR. 2020. Under-the-Radar Dengue Virus Infections in Natural Populations of *Aedes aegypti* Mosquitoes. *mSphere* 5.
  50. Campbell CL, Harrison T, Hess AM, Ebel GD. 2014. MicroRNA levels are modulated in *Aedes aegypti* after exposure to Dengue-2. *Insect Mol Biol* 23:132-9.
  51. Hess AM, Prasad AN, Ptitsyn A, Ebel GD, Olson KE, Barbacioru C, Monighetti C, Campbell CL. 2011. Small RNA profiling of Dengue virus-mosquito interactions implicates the PIWI RNA pathway in anti-viral defense. *BMC Microbiol* 11:45.
  52. Dong S, Behura SK, Franz AWE. 2017. The midgut transcriptome of *Aedes aegypti* fed with saline or protein meals containing chikungunya virus reveals genes potentially involved in viral midgut escape. *BMC Genomics* 18:382.
  53. Buchman A, Gamez S, Li M, Antoshechkin I, Li HH, Wang HW, Chen CH, Klein MJ, Duchemin JB, Paradkar PN, Akbari OS. 2019. Engineered resistance to Zika virus in transgenic *Aedes aegypti* expressing a polycistronic cluster of synthetic small RNAs. *Proc Natl Acad Sci U S A* 116:3656-3661.
  54. Goertz GP, van Bree JWM, Hiralal A, Fernhout BM, Steffens C, Boeren S, Visser TM, Vogels CBF, Abbo SR, Fros JJ, Koenraadt CJM, van Oers MM, Pijlman GP. 2019. Subgenomic flavivirus RNA binds the mosquito DEAD/H-box helicase ME31B and determines Zika virus transmission by *Aedes aegypti*. *Proc Natl Acad Sci U S A* 116:19136-19144.
  55. Nouzova M, Etebari K, Noriega FG, Asgari S. 2018. A comparative analysis of corpora allata-corpora cardiaca microRNA repertoires revealed significant changes during mosquito metamorphosis. *Insect Biochem Mol Biol* 96:10-18.
  56. Grubaugh ND, Weger-Lucarelli J, Murrieta RA, Fauver JR, Garcia-Luna SM, Prasad AN, Black WCt, Ebel GD. 2016. Genetic Drift during Systemic Arbovirus Infection of Mosquito Vectors Leads to Decreased Relative Fitness during Host Switching. *Cell Host Microbe* 19:481-92.
  57. Anglero-Rodriguez YI, MacLeod HJ, Kang S, Carlson JS, Jupatanakul N, Dimopoulos G. 2017. *Aedes aegypti* Molecular Responses to Zika Virus: Modulation of Infection by the Toll and Jak/Stat Immune Pathways and Virus Host Factors. *Front Microbiol* 8:2050.
  58. Price DP, Nagarajan V, Churbanov A, Houde P, Milligan B, Drake LL, Gustafson JE, Hansen IA. 2011. The fat body transcriptomes of the yellow fever mosquito *Aedes aegypti*, pre- and post- blood meal. *PLoS One* 6:e22573.
  59. Li Y, Piermarini PM, Esquivel CJ, Price DP, Drumm HE, Schilkey FD, Hansen IA. 2017. RNA-Seq Comparison of Larval and Adult Malpighian Tubules of the Yellow Fever Mosquito *Aedes aegypti* Reveals Life Stage-Specific Changes in Renal Function. *Front Physiol* 8:283.
  60. Xiao X, Yang L, Pang X, Zhang R, Zhu Y, Wang P, Gao G, Cheng G. 2017. A Mesh-Duox pathway regulates homeostasis in the insect gut. *Nat Microbiol* 2:17020.
  61. Tallon AK, Hill SR, Ignell R. 2019. Sex and age modulate antennal chemosensory-related genes linked to the onset of host seeking in the yellow-fever mosquito, *Aedes aegypti*. *Sci Rep* 9:43.
  62. Alonso DP, Campos M, Troca H, Kunii R, Tripet F, Ribolla PEM. 2019. Gene expression profile of *Aedes aegypti* females in courtship and mating. *Sci Rep* 9:15492.
  63. Neira-Oviedo M, Tsyganov-Bodounov A, Lycett GJ, Kokoza V, Raikhel AS, Krzywinski J. 2011. The RNA-Seq approach to studying the expression of mosquito mitochondrial genes. *Insect Mol Biol* 20:141-52.
  64. Zhang X, Aksoy E, Girke T, Raikhel AS, Karginov FV. 2017. Transcriptome-wide microRNA and target dynamics in the fat body during the gonadotrophic cycle of *Aedes aegypti*. *Proc Natl Acad Sci U S A* 114:E1895-E1903.
  65. Vogel KJ, Valzania L, Coon KL, Brown MR, Strand MR. 2017. Transcriptome Sequencing Reveals Large-Scale Changes in Axenic *Aedes aegypti* Larvae. *PLoS Negl Trop Dis* 11:e0005273.
  66. Price DP, Schilkey FD, Ulanov A, Hansen IA. 2015. Small mosquitoes, large implications: crowding and starvation affects gene expression and nutrient accumulation in *Aedes aegypti*. *Parasit Vectors* 8:252.
  67. Valzania L, Coon KL, Vogel KJ, Brown MR, Strand MR. 2018. Hypoxia-induced transcription factor signaling is essential for larval growth of the mosquito *Aedes aegypti*. *Proc Natl Acad Sci U S A* 115:457-465.
  68. Adelman ZN, Anderson MA, Wiley MR, Murreddu MG, Samuel GH, Morazzani EM, Myles KM. 2013. Cooler temperatures destabilize RNA interference and increase susceptibility of disease vector mosquitoes to viral infection. *PLoS Negl Trop Dis* 7:e2239.
  69. Morazzani EM, Wiley MR, Murreddu MG, Adelman ZN, Myles KM. 2012. Production of virus-derived ping-pong-dependent piRNA-like small RNAs in the mosquito soma. *PLoS Pathog* 8:e1002470.
  70. Adelman ZN, Anderson MA, Liu M, Zhang L, Myles KM. 2012. Sindbis virus induces the production of a novel class of endogenous siRNAs in *Aedes aegypti* mosquitoes. *Insect Mol Biol* 21:357-68.

71. Hu W, Criscione F, Liang S, Tu Z. 2015. MicroRNAs of two medically important mosquito species: *Aedes aegypti* and *Anopheles stephensi*. *Insect Mol Biol* 24:240-52.
72. Biedler JK, Hu W, Tae H, Tu Z. 2012. Identification of early zygotic genes in the yellow fever mosquito *Aedes aegypti* and discovery of a motif involved in early zygotic genome activation. *PLoS One* 7:e33933.
73. Samuel GH, Wiley MR, Badawi A, Adelman ZN, Myles KM. 2016. Yellow fever virus capsid protein is a potent suppressor of RNA silencing that binds double-stranded RNA. *Proc Natl Acad Sci U S A* 113:13863-13868.
74. Jiang X, Biedler JK, Qi Y, Hall AB, Tu Z. 2015. Complete Dosage Compensation in *Anopheles stephensi* and the Evolution of Sex-Biased Genes in Mosquitoes. *Genome Biol Evol* 7:1914-24.
75. Zhu Y, Zhang R, Zhang B, Zhao T, Wang P, Liang G, Cheng G. 2017. Blood meal acquisition enhances arbovirus replication in mosquitoes through activation of the GABAergic system. *Nat Commun* 8:1262.
76. Liu J, Liu Y, Nie K, Du S, Qiu J, Pang X, Wang P, Cheng G. 2016. Flavivirus NS1 protein in infected host sera enhances viral acquisition by mosquitoes. *Nat Microbiol* 1:16087.
77. Liu P, Fu X, Zhu J. 2018. Juvenile hormone-regulated alternative splicing of the taiman gene primes the ecdysteroid response in adult mosquitoes. *Proc Natl Acad Sci U S A* 115:E7738-E7747.
78. Prud'homme SM, Renault D, David JP, Reynaud S. 2018. Multiscale Approach to Deciphering the Molecular Mechanisms Involved in the Direct and Intergenerational Effect of Ibuprofen on Mosquito *Aedes aegypti*. *Environ Sci Technol* 52:7937-7950.
79. Ribeiro JM, Martin-Martin I, Arca B, Calvo E. 2016. A Deep Insight into the Sialome of Male and Female *Aedes aegypti* Mosquitoes. *PLoS One* 11:e0151400.
80. Bonizzoni M, Dunn WA, Campbell CL, Olson KE, Dimon MT, Marinotti O, James AA. 2011. RNA-seq analyses of blood-induced changes in gene expression in the mosquito vector species, *Aedes aegypti*. *BMC Genomics* 12:82.
81. Choi YJ, Aliota MT, Mayhew GF, Erickson SM, Christensen BM. 2014. Dual RNA-seq of parasite and host reveals gene expression dynamics during filarial worm-mosquito interactions. *PLoS Negl Trop Dis* 8:e2905.
82. Juneja P, Ariani CV, Ho YS, Akorli J, Palmer WJ, Pain A, Jiggins FM. 2015. Exome and transcriptome sequencing of *Aedes aegypti* identifies a locus that confers resistance to *Brugia malayi* and alters the immune response. *PLoS Pathog* 11:e1004765.
83. Matthews BJ, Dudchenko O, Kingan SB, Koren S, Antoshechkin I, Crawford JE, Glassford WJ, Herre M, Redmond SN, Rose NH, Weedall GD, Wu Y, Batra SS, Brito-Sierra CA, Buckingham SD, Campbell CL, Chan S, Cox E, Evans BR, Fansiri T, Filipovic I, Fontaine A, Gloria-Soria A, Hall R, Joardar VS, Jones AK, Kay RGG, Kodali VK, Lee J, Lycett GJ, Mitchell SN, Muehling J, Murphy MR, Omer AD, Partridge FA, Peluso P, Aiden AP, Ramasamy V, Rasic G, Roy S, Saavedra-Rodriguez K, Sharan S, Sharma A, Smith ML, Turner J, Weakley AM, Zhao Z, Akbari OS, Black WC, Cao H, et al. 2018. Improved reference genome of *Aedes aegypti* informs arbovirus vector control. *Nature* 563:501-507.
84. Matthews BJ, McBride CS, DeGennaro M, Despo O, Vosshall LB. 2016. The neurotranscriptome of the *Aedes aegypti* mosquito. *BMC Genomics* 17:32.
85. Chung M, Teigen L, Libro S, Bromley RE, Kumar N, Sadzewicz L, Tallon LJ, Foster JM, Michalski ML, Dunning Hotopp JC. 2018. Multispecies Transcriptomics Data Set of *Brugia malayi*, Its *Wolbachia* Endosymbiont wBm, and *Aedes aegypti* across the B. malayi Life Cycle. *Microbiol Resour Announc* 7: e01306-18.
86. Gibbons JG, Janson EM, Hittinger CT, Johnston M, Abbot P, Rokas A. 2009. Benchmarking next-generation transcriptome sequencing for functional and evolutionary genomics. *Mol Biol Evol* 26:2731-44.
87. Edgerton EB, McCrea AR, Berry CT, Kwok JY, Thompson LK, Watson B, Fuller EM, Nolan TJ, Lok JB, Povelones M. 2020. Activation of mosquito immunity blocks the development of transmission-stage filarial nematodes. *Proc Natl Acad Sci U S A* 117:3711-3717.
88. Hall AB, Basu S, Jiang X, Qi Y, Timoshevskiy VA, Biedler JK, Sharakhova MV, Elahi R, Anderson MA, Chen XG, Sharakhov IV, Adelman ZN, Tu Z. 2015. SEX DETERMINATION. A male-determining factor in the mosquito *Aedes aegypti*. *Science* 348:1268-70.
89. Dietrich I, Jansen S, Fall G, Lorenzen S, Rudolf M, Huber K, Heitmann A, Schicht S, Ndiaye EH, Watson M, Castelli I, Brennan B, Elliott RM, Diallo M, Sall AA, Failloux AB, Schnettler E, Kohl A, Becker SC. 2017. RNA Interference Restricts Rift Valley Fever Virus in Multiple Insect Systems. *mSphere* 2:e00090.
90. Tsujimoto H, Hanley KA, Sundararajan A, Devitt NP, Schilkey FD, Hansen IA. 2018. Correction: Dengue virus serotype 2 infection alters midgut and carcass gene expression in the Asian tiger mosquito, *Aedes albopictus*. *PLoS One* 13:e0192128.
91. Esquivel CJ, Cassone BJ, Piermarini PM. 2016. A de novo transcriptome of the Malpighian tubules in non-blood-fed and blood-fed Asian tiger mosquitoes *Aedes albopictus*: insights into diuresis, detoxification, and blood meal processing. *PeerJ* 4:e1784.
92. Esquivel CJ, Cassone BJ, Piermarini PM. 2014. Transcriptomic evidence for a dramatic functional transition of the malpighian tubules after a blood meal in the Asian tiger mosquito *Aedes albopictus*. *PLoS Negl Trop Dis* 8:e2929.
93. Huang X, Poelchau MF, Armbruster PA. 2015. Global transcriptional dynamics of diapause induction in non-blood-fed and blood-fed *Aedes albopictus*. *PLoS Negl Trop Dis* 9:e0003724.
94. Poelchau MF, Reynolds JA, Denlinger DL, Elsik CG, Armbruster PA. 2011. A de novo transcriptome of the Asian tiger mosquito, *Aedes albopictus*, to identify candidate transcripts for diapause preparation. *BMC Genomics* 12:619.
95. Poelchau MF, Reynolds JA, Elsik CG, Denlinger DL, Armbruster PA. 2013. Deep sequencing reveals complex mechanisms of diapause preparation in the invasive mosquito, *Aedes albopictus*. *Proc Biol Sci* 280:20130143.

96. Poelchau MF, Reynolds JA, Denlinger DL, Elisk CG, Armbruster PA. 2013. Transcriptome sequencing as a platform to elucidate molecular components of the diapause response in the Asian tiger mosquito, *Aedes albopictus*. *Physiol Entomol* 38:173-181.
97. Batz ZA, Goff AC, Armbruster PA. 2017. MicroRNAs are differentially abundant during *Aedes albopictus* diapause maintenance but not diapause induction. *Insect Mol Biol* 26:721-733.
98. Boyle JH, Rastas PMA, Huang X, Garner AG, Vythilingam I, Armbruster PA. 2021. A Linkage-Based Genome Assembly for the Mosquito *Aedes albopictus* and Identification of Chromosomal Regions Affecting Diapause. *Insects* 12: 167.
99. Boes KE, Ribeiro JM, Wong A, Harrington LC, Wolfner MF, Sirot LK. 2014. Identification and characterization of seminal fluid proteins in the Asian tiger mosquito, *Aedes albopictus*. *PLoS Negl Trop Dis* 8:e2946.
100. Gamez S, Antoshechkin I, Mendez-Sanchez SC, Akbari OS. 2020. The Developmental Transcriptome of *Aedes albopictus*, a Major Worldwide Human Disease Vector. *G3 (Bethesda)* 10:1051-1062.
101. Ma Q, Srivastav SP, Gamez S, Dayama G, Feitosa-Suntheimer F, Patterson EI, Johnson RM, Matson EM, Gold AS, Brackney DE, Connor JH, Colpitts TM, Hughes GL, Rasgon JL, Nolan T, Akbari OS, Lau NC. 2021. A mosquito small RNA genomics resource reveals dynamic evolution and host responses to viruses and transposons. *Genome Res* 31:512-528.
102. Vedururu RK, Neave MJ, Tachedjian M, Klein MJ, Gorry PR, Duchemin JB, Paradkar PN. 2019. RNASeq Analysis of *Aedes albopictus* Mosquito Midguts after Chikungunya Virus Infection. *Viruses* 11: 513.
103. Vedururu RK, Neave MJ, Sundaramoorthy V, Green D, Harper JA, Gorry PR, Duchemin JB, Paradkar PN. 2019. Whole Transcriptome Analysis of *Aedes albopictus* Mosquito Head and Thorax Post-Chikungunya Virus Infection. *Pathogens* 8: 132.
104. Palatini U, Masri RA, Cosme LV, Koren S, Thibaud-Nissen F, Biedler JK, Krsticevic F, Johnston JS, Halbach R, Crawford JE, Antoshechkin I, Failloux AB, Pischedda E, Marconcini M, Ghurye J, Rhie A, Sharma A, Karagodin DA, Jenrette J, Gamez S, Miesen P, Masterson P, Caccone A, Sharakhova MV, Tu Z, Papathanos PA, Van Rij RP, Akbari OS, Powell J, Phillippy AM, Bonizzoni M. 2020. Improved reference genome of the arboviral vector *Aedes albopictus*. *Genome Biol* 21:215.
105. Marconcini M, Pischedda E, Houé V, Palatini U, Lozada-Chávez N, Sogliani D, Failloux AB, Bonizzoni M. 2021. Profile of Small RNAs, vDNA Forms and Viral Integrations in Late Chikungunya Virus Infection of *Aedes albopictus* Mosquitoes. *Viruses* 13:553.
106. Jin B, Zhao Y, Liu P, Sun Y, Li X, Zhang X, Chen XG, Gu J. 2021. The direct regulation of Aalbdx on AalVgR is indispensable for ovarian development in *Aedes albopictus*. *Pest Manag Sci* 77:1654-1667.
107. Gu J, Hu W, Wu J, Zheng P, Chen M, James AA, Chen X, Tu Z. 2013. miRNA genes of an invasive vector mosquito, *Aedes albopictus*. *PLoS One* 8:e67638.
108. Liu YX, Li FX, Liu ZZ, Jia ZR, Zhou YH, Zhang H, Yan H, Zhou XQ, Chen XG. 2016. Integrated analysis of miRNAs and transcriptomes in *Aedes albopictus* midgut reveals the differential expression profiles of immune-related genes during dengue virus serotype-2 infection. *Insect Sci* 23:377-85.
109. Wang Y, Jin B, Liu P, Li J, Chen X, Gu J. 2018. piRNA Profiling of Dengue Virus Type 2-Infected Asian Tiger Mosquito and Midgut Tissues. *Viruses* 10: 213.
110. Liu Y, Zhou Y, Wu J, Zheng P, Li Y, Zheng X, Puthiyakunnon S, Tu Z, Chen XG. 2015. The expression profile of *Aedes albopictus* miRNAs is altered by dengue virus serotype-2 infection. *Cell Biosci* 5:16.
111. Chen XG, Jiang X, Gu J, Xu M, Wu Y, Deng Y, Zhang C, Bonizzoni M, Dermauw W, Vontas J, Armbruster P, Huang X, Yang Y, Zhang H, He W, Peng H, Liu Y, Wu K, Chen J, Lirakis M, Topalis P, Van Leeuwen T, Hall AB, Jiang X, Thorpe C, Mueller RL, Sun C, Waterhouse RM, Yan G, Tu ZJ, Fang X, James AA. 2015. Genome sequence of the Asian Tiger mosquito, *Aedes albopictus*, reveals insights into its biology, genetics, and evolution. *Proc Natl Acad Sci U S A* 112:E5907-15.
112. Xu Y, Dong Y, Xu Y, Lai Z, Jin B, Hao Y, Gao Y, Sun Y, Chen XG, Gu J. 2019. Differentiation of Long Non-Coding RNA and mRNA Expression Profiles in Male and Female *Aedes albopictus*. *Front Genet* 10:975.
113. Xu J, Su X, Bonizzoni M, Zhong D, Li Y, Zhou G, Nguyen H, Tong S, Yan G, Chen XG. 2018. Comparative transcriptome analysis and RNA interference reveal CYP6A8 and SNPs related to pyrethroid resistance in *Aedes albopictus*. *PLoS Negl Trop Dis* 12:e0006828.
114. Xiao P, Han J, Zhang Y, Li C, Guo X, Wen S, Tian M, Li Y, Wang M, Liu H, Ren J, Zhou H, Lu H, Jin N. 2018. Metagenomic Analysis of Flaviviridae in Mosquito Viromes Isolated From Yunnan Province in China Reveals Genes From Dengue and Zika Viruses. *Front Cell Infect Microbiol* 8:359.
115. Xiao P, Li C, Zhang Y, Han J, Guo X, Xie L, Tian M, Li Y, Wang M, Liu H, Ren J, Zhou H, Lu H, Jin N. 2018. Metagenomic Sequencing From Mosquitoes in China Reveals a Variety of Insect and Human Viruses. *Front Cell Infect Microbiol* 8:364.
116. Shi M, Lin XD, Tian JH, Chen LJ, Chen X, Li CX, Qin XC, Li J, Cao JP, Eden JS, Buchmann J, Wang W, Xu J, Holmes EC, Zhang YZ. 2016. Redefining the invertebrate RNA virosphere. *Nature* 540:539-543.
117. Frangeul L, Blanc H, Saleh MC, Suzuki Y. 2020. Differential Small RNA Responses against Co-Infecting Insect-Specific Viruses in *Aedes albopictus* Mosquitoes. *Viruses* 12: 468.
118. Goic B, Stapleford KA, Frangeul L, Doucet AJ, Gausson V, Blanc H, Schemmel-Jofre N, Cristofari G, Lambrechts L, Vignuzzi M, Saleh MC. 2016. Virus-derived DNA drives mosquito vector tolerance to arboviral infection. *Nat Commun* 7:12410.
119. Bellone R, Lequime S, Jupille H, Goertz GP, Aubry F, Mousson L, Piorkowski G, Yen PS, Gabiane G, Vazeille M, Sakuntabhai A, Pijlman GP, de Lamballerie X, Lambrechts L, Failloux AB. 2020. Experimental adaptation of dengue virus 1 to *Aedes albopictus* mosquitoes by in vivo selection. *Sci Rep* 10:18404.

120. Grigoraki L, Lagnel J, Kioulos I, Kampouraki A, Morou E, Labbe P, Weill M, Vontas J. 2015. Transcriptome Profiling and Genetic Study Reveal Amplified Carboxylesterase Genes Implicated in Temephos Resistance, in the Asian Tiger Mosquito *Aedes albopictus*. PLoS Negl Trop Dis 9:e0003771.
121. Lombardo F, Salvemini M, Fiorillo C, Nolan T, Zwiebel LJ, Ribeiro JM, Arca B. 2017. Deciphering the olfactory repertoire of the tiger mosquito *Aedes albopictus*. BMC Genomics 18:770.
122. Dittmer J, Alafndi A, Gabrieli P. 2019. Fat body-specific vitellogenin expression regulates host-seeking behaviour in the mosquito *Aedes albopictus*. PLoS Biol 17:e3000238.
123. Kubacki J, Flacio E, Qi W, Guidi V, Tonolla M, Fraefel C. 2020. Viral Metagenomic Analysis of *Aedes albopictus* Mosquitos from Southern Switzerland. Viruses 12: 929.
124. Sharma A, Reyes J, Borgmeyer D, Ayala-Chavez C, Snow K, Arshad F, Nuss A, Gulia-Nuss M. 2020. The sugar substitute erythritol shortens the lifespan of *Aedes aegypti* potentially by N-linked protein glycosylation. Sci Rep 10:6195.
125. Shi M, Lin XD, Tian JH, Chen LJ, Chen X, Li CX, Qin XC, Li J, Cao JP, Eden JS, Buchmann J, Wang W, Xu J, Holmes EC, Zhang YZ. 2016. Redefining the invertebrate RNA virosphere. Nature 540:539–543.
126. Manni M, Zdobnov EM. 2020. A Novel Anphevirus in *Aedes albopictus* Mosquitoes Is Distributed Worldwide and Interacts with the Host RNA Interference Pathway. Viruses 12: 1264.
127. Shi C, Zhao L, Atoni E, Zeng W, Hu X, Matthijssens J, Yuan Z, Xia H. 2020. Stability of the Virome in Lab- and Field-Collected *Aedes albopictus* Mosquitoes across Different Developmental Stages and Possible Core Viruses in the Publicly Available Virome Data of *Aedes* Mosquitoes. mSystems 5: e00640-20.
128. Bishop C, Parry R, Asgari S. 2020. Effect of *Wolbachia* wAlbB on a positive-sense RNA negev-like virus: a novel virus persistently infecting *Aedes albopictus* mosquitoes and cells. J Gen Virol 101:216-225.
129. Maringer K, Yousuf A, Heesom KJ, Fan J, Lee D, Fernandez-Sesma A, Bessant C, Matthews DA, Davidson AD. 2017. Proteomics informed by transcriptomics for characterising active transposable elements and genome annotation in *Aedes aegypti*. BMC Genomics 18:101.
130. Mayoral JG, Etebari K, Hussain M, Khromykh AA, Asgari S. 2014. *Wolbachia* infection modifies the profile, shuttling and structure of microRNAs in a mosquito cell line. PLoS One 9:e96107.
131. Mayoral JG, Hussain M, Joubert DA, Iturbe-Ormaetxe I, O'Neill SL, Asgari S. 2014. *Wolbachia* small noncoding RNAs and their role in cross-kingdom communications. Proc Natl Acad Sci U S A 111:18721-6.
132. Xu YP, Qiu Y, Zhang B, Chen G, Chen Q, Wang M, Mo F, Xu J, Wu J, Zhang RR, Cheng ML, Zhang NN, Lyu B, Zhu WL, Wu MH, Ye Q, Zhang D, Man JH, Li XF, Cui J, Xu Z, Hu B, Zhou X, Qin CF. 2019. Zika virus infection induces RNAi-mediated antiviral immunity in human neural progenitors and brain organoids. Cell Res 29:265-273.
133. Tassetto M, Kunitomi M, Whitfield ZJ, Dolan PT, Sanchez-Vargas I, Garcia-Knight M, Ribiero I, Chen T, Olson KE, Andino R. 2019. Control of RNA viruses in mosquito cells through the acquisition of vDNA and endogenous viral elements. eLife 8:e05378.
134. Weger-Lucarelli J, Ruckert C, Grubaugh ND, Misencik MJ, Armstrong PM, Stenglein MD, Ebel GD, Brackney DE. 2018. Adventitious viruses persistently infect three commonly used mosquito cell lines. Virology 521:175-180.
135. Varjak M, Dietrich I, Sreenu VB, Till BE, Merits A, Kohl A, Schnettler E. 2018. Spindle-E Acts Antivirally Against Alphaviruses in Mosquito Cells. Viruses 10: 88.
136. Varjak M, Donald CL, Mottram TJ, Sreenu VB, Merits A, Maringer K, Schnettler E, Kohl A. 2017. Characterization of the Zika virus induced small RNA response in *Aedes aegypti* cells. PLoS Negl Trop Dis 11:e0006010.
137. Goertz GP, Miesen P, Overheul GJ, van Rij RP, van Oers MM, Pijlman GP. 2019. Mosquito Small RNA Responses to West Nile and Insect-Specific Virus Infections in *Aedes* and *Culex* Mosquito Cells. Viruses 11: 271.
138. Dietrich I, Shi X, McFarlane M, Watson M, Blomstrom AL, Skelton JK, Kohl A, Elliott RM, Schnettler E. 2017. The Antiviral RNAi Response in Vector and Non-vector Cells against Orthobunyaviruses. PLoS Negl Trop Dis 11:e0005272.
139. Skalsky RL, Vanlandingham DL, Scholle F, Higgs S, Cullen BR. 2010. Identification of microRNAs expressed in two mosquito vectors, *Aedes albopictus* and *Culex quinquefasciatus*. BMC Genomics 11:119.
140. Hermanns K, Marklewitz M, Zirkel F, Overheul GJ, Page RA, Loaiza JR, Drosten C, van Rij RP, Junglen S. 2020. Agua Salud alphavirus defines a novel lineage of insect-specific alphaviruses discovered in the New World. J Gen Virol 101:96-104.
141. Du J, Gao S, Tian Z, Guo Y, Kang D, Xing S, Zhang G, Liu G, Luo J, Chang H, Yin H. 2019. Transcriptome analysis of responses to bluetongue virus infection in *Aedes albopictus* cells. BMC Microbiol 19:121.
142. Li M, Xing D, Su D, Wang D, Gao H, Lan C, Gu Z, Zhao T, Li C. 2021. Transcriptome Analysis of Responses to Dengue Virus 2 Infection in *Aedes albopictus* (Skuse) C6/36 Cells. Viruses 13: 343.
143. Teramoto T, Huang X, Armbruster PA, Padmanabhan R. 2019. Infection of *Aedes albopictus* Mosquito C6/36 Cells with the wMelpop Strain of *Wolbachia* Modulates Dengue Virus-Induced Host Cellular Transcripts and Induces Critical Sequence Alterations in the Dengue Viral Genome. J Virol 93.
144. Azlan A, Obeidat SM, Theva Das K, Yunus MA, Azzam G. 2021. Genome-wide identification of *Aedes albopictus* long noncoding RNAs and their association with dengue and Zika virus infection. PLoS Negl Trop Dis 15:e0008351.

145. Peccoud J, Lequime S, Moltini-Conclois I, Giraud I, Lambrechts L, Gilbert C. 2018. A Survey of Virus Recombination Uncovers Canonical Features of Artificial Chimeras Generated During Deep Sequencing Library Preparation. *G3 (Bethesda)* 8:1129-1138.
146. Miller JR, Koren S, Dilley KA, Puri V, Brown DM, Harkins DM, Thibaud-Nissen F, Rosen B, Chen XG, Tu Z, Sharakhov IV, Sharakhova MV, Sebra R, Stockwell TB, Bergman NH, Sutton GG, Phillippy AM, Piermarini PM, Shabman RS. 2018. Analysis of the *Aedes albopictus* C6/36 genome provides insight into cell line utility for viral propagation. *Gigascience* 7:1-13.
147. Avila-Bonilla RG, Yocupicio-Monroy M, Marchat LA, De Nova-Ocampo MA, Del Angel RM, Salas-Benito JS. 2017. Analysis of the miRNA profile in C6/36 cells persistently infected with dengue virus type 2. *Virus Res* 232:139-151.
148. Bishop C, Asgari S. 2020. Altered gene expression profile of *Wolbachia pipientis* wAlbB strain following transinfection from its native host *Aedes albopictus* to *Aedes aegypti* cells. *Mol Microbiol* doi:10.1111/mmi.14668.
149. Darby AC, Gill AC, Armstrong SD, Hartley CS, Xia D, Wastling JM, Makepeace BL. 2014. Integrated transcriptomic and proteomic analysis of the global response of *Wolbachia* to doxycycline-induced stress. *ISME J* 8:925-37.
150. Woolfit M, Algama M, Keith JM, McGraw EA, Popovici J. 2015. Discovery of putative small non-coding RNAs from the obligate intracellular bacterium *Wolbachia pipientis*. *PLoS One* 10:e0118595.
